# Supplementary material for: exo-Selective construction of spiro-[butyrolactone-pyrrolidine] via 1,3-dipolar cycloaddition of azomethine ylides with α-methylene-γ-butyrolactone catalyzed by Cu(i)/DTBM-BIPHEP
Source: Royal Society of Chemistry journal article supplement (doi:10.1039/c3cc45493b), 2013-01-01
Supplement: c3cc45493b.pdf [file c3cc45493b.pdf]

*Supporting Information for*

***exo*-Selective Construction of Spiro-[butyrolactone-pyrrolidine] via  
1,3-Dipolar Cycloaddition of Azomethine Ylides with  $\alpha$ -Methylene- $\gamma$   
Butyrolactone Catalyzed by Cu(I)/DTBM-BIPHEP**

Qing-Hua Li, Tang-Lin Liu, Liang Wei, Xiang Zhou, Hai-Yan Tao, and Chun-Jiang Wang\*

Table of Contents

|       |                                                                                                                                                                           |          |
|-------|---------------------------------------------------------------------------------------------------------------------------------------------------------------------------|----------|
| I.    | General Remarks.....                                                                                                                                                      | S2       |
| II.   | Metal salt Screening for Asymmetric 1,3-Dipolar Cycloaddition of Azomethine Ylides with $\alpha$ -methylene- $\gamma$ -butyrolactone.....                                 | S2       |
| III.  | General Procedure for Racemic 1,3-Dipolar Cycloaddition of $\alpha$ -Methylene- $\gamma$ -butyrolactone.....                                                              | S3       |
| IV.   | General Procedure for Asymmetric 1,3-Dipolar Cycloaddition of Imino Esters with $\alpha$ -Methylene- $\gamma$ -butyrolactone.....                                         | S3-19    |
| V.    | Proposed Transition States of the <i>exo</i> -Selectivity for Asymmetric 1,3-Dipolar Cycloaddition of Imino Esters with $\alpha$ -Methylene- $\gamma$ -butyrolactone..... | S20      |
| VI.   | <sup>31</sup> P NMR Spectra of ( <i>R</i> )-DTBM-BIPHEP /Cu(MeCN) <sub>4</sub> BF <sub>4</sub> complex.....                                                               | S21-23   |
| VII.  | References.....                                                                                                                                                           | S23      |
| VIII. | <sup>1</sup> H NMR and <sup>13</sup> C NMR Spectra.....                                                                                                                   | S24-79   |
| IX.   | HPLC Chromatograms.....                                                                                                                                                   | S80-S135 |

## I. General Remarks

<sup>1</sup>H NMR spectra were recorded on a VARIAN Mercury 300 MHz spectrometer in CDCl<sub>3</sub>. Chemical shifts are reported in ppm with the internal TMS signal at 0.0 ppm as a standard. The data are reported as (s = single, d = double, t = triple, q = quartet, m = multiple or unresolved, and brs = broad single). <sup>13</sup>C NMR spectra were recorded on a Bruker 75 MHz or 100 MHz spectrometer in CDCl<sub>3</sub>. Chemical shifts are reported in ppm with the internal chloroform signal at 77.0 ppm as a standard. Commercially available reagents were used without further purification. All reactions were monitored by TLC with silica gel-coated plates. Diastereomeric ratios were determined from crude <sup>1</sup>H NMR or HPLC analysis. Enantiomeric ratios were determined by HPLC, using a chiralpak AD-H column, a chiralpak AS-H column or a chiralcel OD-H column with hexane and *i*-PrOH as solvents.  $\alpha$ -methylene- $\gamma$ -butyrolactone was prepared according to the literature procedure.<sup>1</sup> The racemic adducts were obtained by using AgOAc/BINAP as the catalyst. The absolute configuration of **5a** was determined unequivocally according to the X-ray diffraction analysis, and those of other adducts were deduced on the basis of these results.

## II. Metal salt Screening for Asymmetric 1,3-Dipolar Cycloaddition of Azomethine Ylides with $\alpha$ -methylene- $\gamma$ -butyrolactone.

**Table S1.** Screening studies of the catalytic asymmetric 1,3-DC of imino ester **1a** with  $\alpha$ -methylene- $\gamma$ -butyrolactone **2a**<sup>a</sup>

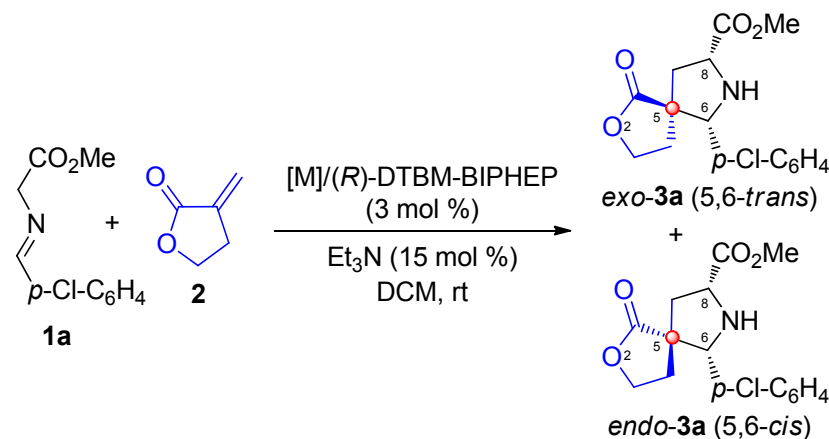

| Entry | [M]                                    | <i>exo/endo</i> | yield (%) <sup>b</sup> | ee (%) <sup>c</sup> |
|-------|----------------------------------------|-----------------|------------------------|---------------------|
| 1     | AgBF <sub>4</sub>                      | >98:2           | 80                     | 98                  |
| 2     | CuOTf·1/2C <sub>6</sub> H <sub>6</sub> | >98:2           | 70                     | 98                  |
| 3     | CuOAc                                  | >98:2           | 83                     | 97                  |
| 4     | Cu(OTf) <sub>2</sub>                   | 92:8            | 68                     | 97                  |

<sup>a</sup> All reactions were carried out with 0.35 mmol of **1a** and 0.23 mmol of **2** in 2 mL solvent for 1-2 h. <sup>b</sup> Isolated yields of *exo*-**3a** and *endo*-**3a**.  
<sup>c</sup> Ee of *exo*-**3a** was determined by HPLC analysis.

## III. General Procedure for Asymmetric 1,3-Dipolar Cycloaddition of Imino Esters with $\alpha$ -Methylene- $\gamma$ -butyrolactone

Under argon atmosphere, *rac*-BINAP (4.7 mg, 0.0076 mmol) and AgOAc (1.1 mg, 0.0069 mmol) were dissolved in 2 mL of DCM, and stirred at room temperature for about 0.5 h. Then, imine substrate (0.35 mmol), Et<sub>3</sub>N (0.03 mmol) and  $\alpha$ -Methylenebutyrolactone (0.23 mmol) were added sequentially. Once starting material was consumed (monitored by TLC), the organic solvent was removed and the residue was purified by column chromatography.

#### IV. General Procedure for Asymmetric 1,3-Dipolar Cycloaddition of Azomethine Ylides with $\alpha$ -Methylenebutyrolatone.

Under argon atmosphere, (*R*)-DTBM-Biphep (**L5**) (8.7 mg, 0.0076 mmol) and  $\text{Cu}(\text{CH}_3\text{CN})_4\text{BF}_4$  (2.2 mg, 0.0069 mmol) were dissolved in 2 mL of DCM, and stirred at room temperature for about 0.5 h. After imine substrate (0.35 mmol) was added. Then,  $\alpha$ -Methylenebutyrolatone (0.23 mmol) and  $\text{Et}_3\text{N}$  (0.03 mmol) was added sequentially. Once starting material was consumed (monitored by TLC), the mixture was filtered through celite and the filtrate was concentrated to dryness. The residue was purified by column chromatography to give the corresponding cycloaddition product, which was then directly analyzed by HPLC analysis to determine the enantiomeric excess.

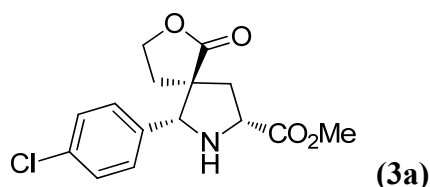

#### **(5*R*,6*R*,8*R*)-methyl 6-(4-chlorophenyl)-1-oxo-2-oxa-7-azaspiro[4.4]nonane-8-carboxylate**

The title compound was prepared according to the general procedure as described above in 87% yield;  $[\alpha]_D^{25} = +24.0$  (*c* 0.75,  $\text{CHCl}_3$ );  $^1\text{H}$  NMR ( $\text{CDCl}_3$ , TMS, 300 MHz)  $\delta$  7.40-7.26 (m, 4H), 4.60 (s, 1H), 4.15-4.09 (m, 1H), 4.06-3.98 (m, 1H), 3.79 (s, 3H), 3.36 (dd,  $J_1 = 8.1$  Hz,  $J_2 = 15.9$  Hz, 1H), 2.80-2.72 (m, 1H), 2.27-2.23 (m, 1H), 2.11-2.02 (m, 1H), 1.95-1.86 (m, 1H);  $^{13}\text{C}$  NMR ( $\text{CDCl}_3$ , TMS, 75 MHz) 179.7, 174.0, 136.2, 134.0, 128.7, 128.2, 67.7, 65.8, 56.9, 52.3, 40.4, 30.7; IR (KBr)  $\nu$  3360, 2952, 2820, 2341, 1739, 1513, 1440, 1248, 1216, 1192, 1030, 758  $\text{cm}^{-1}$ . HRMS: calcd. for  $\text{C}_{15}\text{H}_{16}\text{ClNO}_4 + \text{H}^+$ : 310.0839, found: 310.0841. The product was analyzed by HPLC to determine the enantiomeric excess: >99% ee (Chiralpak AS-H, *i*-propanol/hexane = 30/70, flow rate 1.0 mL/min,  $\lambda = 220$  nm);  $t_r = 16.76$  and 22.26 min.

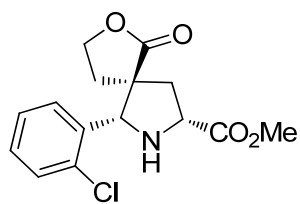

(3b)

**(5R,6S,8R)-methyl 6-(2-chlorophenyl)-1-oxo-2-oxa-7-azaspiro[4.4]nonane-8-carboxylate**

The title compound was prepared according to the general procedure as described above in 80% yield.  $[\alpha]_D^{25} = -13.1$  (*c* 0.76, CHCl<sub>3</sub>); <sup>1</sup>H NMR (CDCl<sub>3</sub>, TMS, 300 MHz) δ 7.91 (d, *J* = 7.2 Hz, 1H), 7.36-7.21 (m, 3H), 5.12 (s, 1H), 4.22 (t, *J* = 8.1 Hz, 1H), 4.07 (dd, *J*<sub>1</sub> = 7.8 Hz, *J*<sub>2</sub> = 15.6 Hz, 1H), 3.79-3.70 (m, 4H), 2.74-2.67 (m, 1H), 2.18-2.04 (m, 2H), 1.82-1.73 (m, 1H); <sup>13</sup>C NMR (CDCl<sub>3</sub>, TMS, 75 MHz) δ 180.2, 173.5, 137.5, 133.3, 129.4, 129.3, 129.0, 127.0, 66.0, 62.7, 57.5, 52.1, 51.1, 40.4, 32.4; IR (KBr) ν 3350, 2912, 2355, 1730, 1513, 1433, 1240, 1218, 1188, 1028, 759 cm<sup>-1</sup>. HRMS: calcd. for C<sub>15</sub>H<sub>16</sub>ClNO<sub>4</sub> + H<sup>+</sup>: 310.0841, found: 310.0841. The product was analyzed by HPLC to determine the enantiomeric excess: 98% ee (Chiralpak AD-H, *i*-propanol/hexane = 30/70, flow rate 1.0 mL/min, λ = 220 nm); t<sub>r</sub> = 8.78 and 9.78 min.

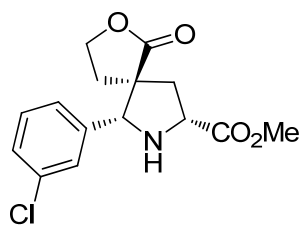

(3c)

**(5R,6R,8R)-methyl 6-(3-chlorophenyl)-1-oxo-2-oxa-7-azaspiro[4.4]nonane-8-carboxylate**

The title compound was prepared according to the general procedure as described above in 72% yield.  $[\alpha]_D^{25} = +30.6$  (*c* 0.65, CHCl<sub>3</sub>); <sup>1</sup>H NMR (CDCl<sub>3</sub>, TMS, 300 MHz) δ 7.50 (s, 1H), 7.28 (m, 3H), 4.60 (s, 1H), 4.17-4.13 (m, 1H), 4.05-4.02 (m, 1H), 3.80 (s, 3H), 3.46-3.38 (m, 1H), 2.78-2.71 (m, 1H), 2.27 (dd, *J*<sub>1</sub> = 4.2 Hz, *J*<sub>2</sub> = 13.2 Hz, 1H), 2.12-1.97 (m, 1H), 1.92-1.88 (m, 1H); <sup>13</sup>C NMR (CDCl<sub>3</sub>, TMS, 75 MHz) 179.7, 173.8, 140.0, 134.6, 129.8, 128.4, 126.9, 125.2, 67.7, 65.8, 56.9, 52.4, 52.3, 40.2, 30.8;

IR (KBr)  $\nu$  2945, 2818, 2340, 1720, 1512, 1453, 1240, 1215, 1185, 1023, 757  $\text{cm}^{-1}$ .  
HRMS: calcd. for  $\text{C}_{15}\text{H}_{16}\text{ClNO}_4 + \text{H}^+$ : 310.0828, found: 310.0841. The product was analyzed by HPLC to determine the enantiomeric excess: 99% ee (Chiralpak AS-H, *i*-propanol/hexane = 30/70, flow rate 1.0 mL/min,  $\lambda$  = 220 nm);  $t_r$  = 17.34 and 21.35 min.

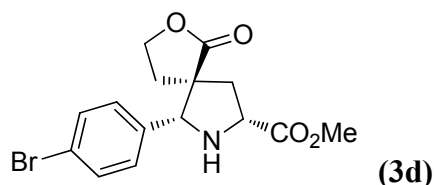

**(5R,6R,8R)-methyl 6-(4-bromophenyl)-1-oxo-2-oxa-7-azaspiro[4.4]nonane-8-carboxylate**

The title compound was prepared according to the general procedure as described above in 85% yield.  $[\alpha]_D^{25} = +27.7$  (*c* 0.95,  $\text{CHCl}_3$ );  $^1\text{H}$  NMR ( $\text{CDCl}_3$ , TMS, 300 MHz)  $\delta$  7.47 (d,  $J$  = 8.4 Hz, 2H), 7.32 (d,  $J$  = 8.4 Hz, 2H), 4.57 (s, 1H), 4.15-4.12 (m, 1H), 4.02 (dd,  $J_1$  = 8.4 Hz,  $J_2$  = 14.7 Hz, 1H), 3.79 (s, 3H), 3.37 (dd,  $J_1$  = 7.8 Hz,  $J_2$  = 15.0 Hz, 1H), 2.75 (dd,  $J_1$  = 10.2 Hz,  $J_2$  = 13.2 Hz, 1H), 2.25 (dd,  $J_1$  = 4.5 Hz,  $J_2$  = 13.2 Hz, 1H), 2.10-2.01 (m, 1H), 1.95-1.86 (m, 1H);  $^{13}\text{C}$  NMR ( $\text{CDCl}_3$ , TMS, 75 MHz) 179.2, 173.5, 136.3, 131.1, 128.1, 121.6, 67.3, 65.3, 56.4, 51.8, 39.8, 30.2; IR (KBr)  $\nu$  3330, 2950, 2810, 2338, 1730, 1508, 1436, 1245, 1208, 1183, 1021, 759  $\text{cm}^{-1}$ .  
HRMS: calcd. for  $\text{C}_{15}\text{H}_{16}\text{BrNO}_4 + \text{H}^+$ : 354.0347, found: 354.0335. The product was analyzed by HPLC to determine the enantiomeric excess: 99% ee (Chiralpak AS-H, *i*-propanol/hexane = 30/70, flow rate 1.0 mL/min,  $\lambda$  = 220 nm);  $t_r$  = 17.82 and 22.15 min.

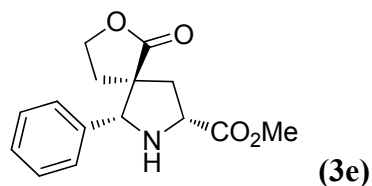

**(5R,6R,8R)-methyl 1-oxo-6-phenyl-2-oxa-7-azaspiro[4.4]nonane-8-carboxylate**

The title compound was prepared according to the general procedure as described

above in 83% yield.  $[\alpha]_D^{25} = +14.3$  ( $c$  0.40,  $\text{CHCl}_3$ );  $^1\text{H}$  NMR ( $\text{CDCl}_3$ , TMS, 300 MHz)  $\delta$  7.44-7.33 (m, 4H), 4.60 (s, 1H), 4.14 (dd,  $J_1 = 4.5$  Hz,  $J_2 = 9.9$  Hz, 1H), 3.97 (dd,  $J_1 = 3.3$  Hz,  $J_2 = 8.4$  Hz, 1H), 3.80 (s, 3H), 3.19 (dd,  $J_1 = 7.8$  Hz,  $J_2 = 15.9$  Hz, 1H), 2.80 (dd,  $J_1 = 9.9$  Hz,  $J_2 = 16.2$  Hz, 1H), 2.23 (dd,  $J_1 = 4.5$  Hz,  $J_2 = 10.2$  Hz, 1H), 2.16-2.09 (m, 1H), 1.93-1.83 (m, 1H);  $^{13}\text{C}$  NMR ( $\text{CDCl}_3$ , TMS, 75 MHz) 180.0, 174.2, 137.4, 128.5, 128.2, 126.8, 68.6, 65.8, 57.1, 52.6, 52.3, 40.8, 31.0; IR (KBr)  $\nu$  3362, 2948, 2807, 2335, 1739, 1513, 1440, 1215, 1180, 1019, 757  $\text{cm}^{-1}$ . HRMS: calcd. for  $\text{C}_{15}\text{H}_{17}\text{NO}_4 + \text{H}^+$ : 276.1229, found: 276.1230. The product was analyzed by HPLC to determine the enantiomeric excess: 99% ee (Chiralpak AS-H, *i*-propanol/hexane = 30/70, flow rate 1.0 mL/min,  $\lambda = 220$  nm);  $t_r = 14.30$  and 21.29 min.

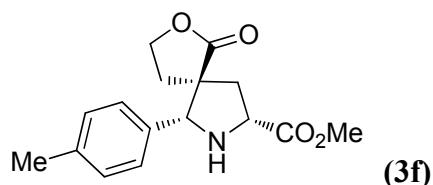

**(5R,6R,8R)-methyl 1-oxo-6-(p-tolyl)-2-oxa-7-azaspiro[4.4]nonane-8-carboxylate**

The title compound was prepared according to the general procedure as described above in 78% yield.  $[\alpha]_D^{25} = +9.1$  ( $c$  1.25,  $\text{CHCl}_3$ );  $^1\text{H}$  NMR ( $\text{CDCl}_3$ , TMS, 300 MHz)  $\delta$  7.30 (d,  $J = 7.8$  Hz, 2H), 7.14 (d,  $J = 7.8$  Hz, 2H), 4.55 (s, 1H), 4.12 (m, 1H), 3.96 (dd,  $J_1 = 8.1$  Hz,  $J_2 = 13.2$  Hz, 1H), 3.79 (s, 3H), 3.19 (dd,  $J_1 = 7.8$  Hz,  $J_2 = 16.8$  Hz, 1H), 2.83-2.76 (m, 1H), 2.34 (s, 3H), 2.24-2.10 (m, 2H), 1.91-1.82 (m, 1H);  $^{13}\text{C}$  NMR ( $\text{CDCl}_3$ , TMS, 75 MHz) 180.1, 174.3, 138.0, 134.1, 129.1, 126.6, 68.5, 65.8, 57.0, 52.3, 40.9, 30.9, 21.0; IR (KBr)  $\nu$  3350, 2928, 2841, 2341, 1752, 1516, 1440, 1250, 1218, 1175, 1031, 759  $\text{cm}^{-1}$ . HRMS: calcd. for  $\text{C}_{16}\text{H}_{19}\text{NO}_4 + \text{H}^+$ : 290.1388, found: 290.1387. The product was analyzed by HPLC to determine the enantiomeric excess: 99% ee (Chiralpak AS-H, *i*-propanol/hexane = 30/70, flow rate 1.0 mL/min,  $\lambda = 220$  nm);  $t_r = 12.74$  and 21.00 min.

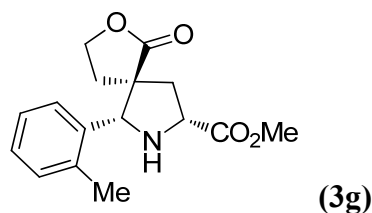

**(5R,6R,8R)-methyl 1-oxo-6-(o-tolyl)-2-oxa-7-azaspiro[4.4]nonane-8-carboxylate**

The title compound was prepared according to the general procedure as described above in 70% yield.  $[\alpha]_D^{25} = +11.5$  (*c* 0.78, CHCl<sub>3</sub>); <sup>1</sup>H NMR (CDCl<sub>3</sub>, TMS, 300 MHz) δ 7.78 (d, *J* = 6.6 Hz, 1H), 7.27-7.14 (m, 3H), 4.90 (s, 1H), 4.13 (m, 1H), 4.01-3.94 (m, 1H), 3.80 (s, 3H), 3.26 (dd, *J*<sub>1</sub> = 7.5 Hz, *J*<sub>2</sub> = 16.2 Hz, 1H), 2.86-2.79 (m, 1H), 2.29 (s, 3H), 2.25-2.14 (m, 2H), 1.92-1.82 (m, 1H); <sup>13</sup>C NMR (CDCl<sub>3</sub>, TMS, 75 MHz) 180.6, 173.9, 136.3, 136.1, 130.7, 127.8, 127.3, 125.9, 66.1, 63.6, 57.3, 52.2, 41.3, 32.4, 19.4; IR (KBr) ν 3340, 2950, 2825, 2341, 1737, 1512, 1444, 1245, 1210, 1189, 1031, 758 cm<sup>-1</sup>. HRMS: calcd. for C<sub>16</sub>H<sub>19</sub>NO<sub>4</sub> + H<sup>+</sup>: 290.1389, found: 290.1387. The product was analyzed by HPLC to determine the enantiomeric excess: 99% ee (Chiralpak OD-H, *i*-propanol/hexane = 20/80, flow rate 1.0 mL/min, λ = 220 nm); t<sub>r</sub> = 14.99 and 25.31 min.

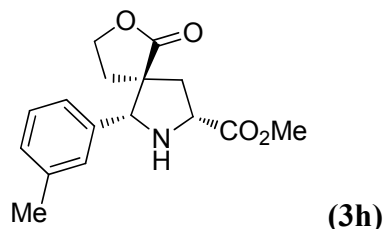

**(5R,6R,8R)-methyl 1-oxo-6-(m-tolyl)-2-oxa-7-azaspiro[4.4]nonane-8-carboxylate**

The title compound was prepared according to the general procedure as described above in 75% yield.  $[\alpha]_D^{25} = +14.9$  (*c* 0.62, CHCl<sub>3</sub>); <sup>1</sup>H NMR (CDCl<sub>3</sub>, TMS, 300 MHz) δ 7.29-7.13 (m, 4H), 4.54 (s, 1H), 4.15-4.12 (m, 1H), 3.97 (dd, *J*<sub>1</sub> = 8.7 Hz, *J*<sub>2</sub> = 13.8 Hz, 1H), 3.80 (s, 3H), 3.22 (dd, *J*<sub>1</sub> = 8.1 Hz, *J*<sub>2</sub> = 16.2 Hz, 1H), 2.83-2.75 (m, 1H), 2.55 (brs, 1H), 2.34 (s, 3H), 2.24-2.10 (m, 2H), 1.92-1.85 (m, 1H); <sup>13</sup>C NMR (CDCl<sub>3</sub>, TMS, 75 MHz) 180.0, 174.2, 138.2, 137.2, 128.9, 128.3, 127.3, 123.8, 68.6, 65.8, 57.0, 52.5, 52.2, 40.9, 31.0, 21.3; IR (KBr) ν 3351, 2970, 2817, 2340, 1735, 1516, 1236, 1211, 1185, 1025, 759 cm<sup>-1</sup>. HRMS: calcd. for C<sub>16</sub>H<sub>19</sub>NO<sub>4</sub> + H<sup>+</sup>: 290.1386,



found: 290.1387. The product was analyzed by HPLC to determine the enantiomeric excess: 97% ee (Chiralpak AS-H, *i*-propanol/hexane = 30/70, flow rate 1.0 mL/min,  $\lambda$  = 220 nm);  $t_r$  = 12.43 and 16.80 min.

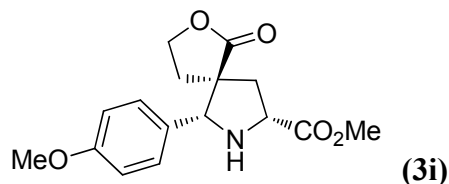

**(5*R*,6*R*,8*R*)-methyl 6-(4-methoxyphenyl)-1-oxo-2-oxa-7-azaspiro[4.4]nonane-8-carboxylate**

The title compound was prepared according to the general procedure as described above in 80% yield.  $[\alpha]_D^{25} = -19.0$  ( $c$  1.09, CHCl<sub>3</sub>); <sup>1</sup>H NMR (CDCl<sub>3</sub>, TMS, 300 MHz)  $\delta$  7.34 (d,  $J$  = 8.4 Hz, 2H), 6.87 (d,  $J$  = 8.4 Hz, 2H), 4.53 (s, 1H), 4.12 (dd,  $J_1$  = 4.5 Hz,  $J_2$  = 10.2 Hz, 1H), 4.01-3.94 (m, 1H), 3.80 (s, 3H), 3.79 (s, 3H), 3.21 (dd,  $J_1$  = 8.1 Hz,  $J_2$  = 16.5 Hz, 1H), 2.78 (dd,  $J_1$  = 10.2 Hz,  $J_2$  = 13.2 Hz, 1H), 2.24-2.11 (m, 2H), 1.92-1.83 (m, 1H); <sup>13</sup>C NMR (CDCl<sub>3</sub>, TMS, 75 MHz) 180.0, 174.2, 159.4, 129.1, 127.8, 113.8, 68.2, 65.7, 56.9, 55.1, 52.5, 52.2, 40.7, 30.9; IR (KBr)  $\nu$  3330, 2935, 2818, 2348, 1725, 1518, 1447, 1236, 1214, 1183, 1017, 759 cm<sup>-1</sup>. HRMS: calcd. for C<sub>16</sub>H<sub>19</sub>NO<sub>5</sub> + H<sup>+</sup>: 306.1339, found: 306.1336. The product was analyzed by HPLC to determine the enantiomeric excess: 99% ee (Chiralpak AS-H, *i*-propanol/hexane = 30/70, flow rate 1.0 mL/min,  $\lambda$  = 220 nm);  $t_r$  = 23.50 and 28.21 min.

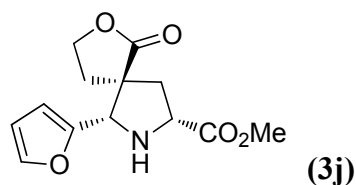

**(5*R*,6*S*,8*R*)-methyl 6-(furan-2-yl)-1-oxo-2-oxa-7-azaspiro[4.4]nonane-8-carboxylate**

The title compound was prepared according to the general procedure as described above in 74% yield.  $[\alpha]_D^{25} = +67.3$  ( $c$  0.42, CHCl<sub>3</sub>); <sup>1</sup>H NMR (CDCl<sub>3</sub>, TMS, 300 MHz)  $\delta$  7.40 (s, 1H), 6.37 (s, 2H), 4.50 (s, 1H), 4.14-4.10 (m, 2H), 3.79 (s, 3H), 3.54

(dd,  $J_1 = 7.8$  Hz,  $J_2 = 15.9$  Hz, 1H), 2.77 (dd,  $J_1 = 9.6$  Hz,  $J_2 = 13.5$  Hz, 1H), 2.29-2.16 (m, 2H), 1.95-1.85 (m, 1H);  $^{13}\text{C}$  NMR ( $\text{CDCl}_3$ , TMS, 75 MHz) 179.2, 174.1, 151.0, 142.4, 110.5, 108.1, 65.6, 63.3, 57.7, 52.7, 52.4, 41.0, 31.2; IR (KBr)  $\nu$  3352, 2950, 2816, 2335, 1730, 1514, 1445, 1236, 1215, 1175, 1050, 769  $\text{cm}^{-1}$ . HRMS: calcd. for  $\text{C}_{13}\text{H}_{15}\text{NO}_5 + \text{H}^+$ : 266.1023, found: 266.1023. The product was analyzed by HPLC to determine the enantiomeric excess: 98% ee (Chiralpak AS-H, *i*-propanol/hexane = 30/70, flow rate 1.0 mL/min,  $\lambda = 220$  nm);  $t_r = 19.39$  and 25.99 min.

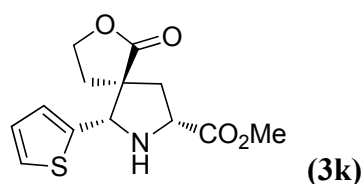

**(5R,6S,8R)-methyl 1-oxo-6-(thiophen-2-yl)-2-oxa-7-azaspiro[4.4]nonane-8-carboxylate**

The title compound was prepared according to the general procedure as described above in 84% yield.  $[\alpha]_D^{25} = +43.3$  ( $c$  0.88,  $\text{CHCl}_3$ );  $^1\text{H}$  NMR ( $\text{CDCl}_3$ , TMS, 300 MHz)  $\delta$  7.29-7.25 (m, 1H), 7.02-6.98 (m, 2H), 4.84 (s, 1H), 4.12-4.06 (m, 2H), 3.79 (s, 3H), 3.53 (dd,  $J_1 = 7.8$  Hz,  $J_2 = 16.6$  Hz, 1H), 2.76-2.69 (m, 2H), 2.30-2.25 (m, 2H), 2.00-1.90 (m, 1H);  $^{13}\text{C}$  NMR ( $\text{CDCl}_3$ , TMS, 75 MHz) 179.4, 173.6, 141.4, 127.0, 124.9, 124.7, 65.9, 64.7, 56.9, 52.8, 52.3, 39.9, 31.0; IR (KBr)  $\nu$  2952, 2819, 2345, 1735, 1517, 1449, 1240, 1213, 1185, 1016, 759  $\text{cm}^{-1}$ . HRMS: calcd. for  $\text{C}_{13}\text{H}_{15}\text{NO}_4\text{S} + \text{H}^+$ : 282.0792, found: 282.0795. The product was analyzed by HPLC to determine the enantiomeric excess: 96% ee (Chiralpak AS-H, *i*-propanol/hexane = 30/70, flow rate 1.0 mL/min,  $\lambda = 220$  nm);  $t_r = 19.43$  and 26.17 min.

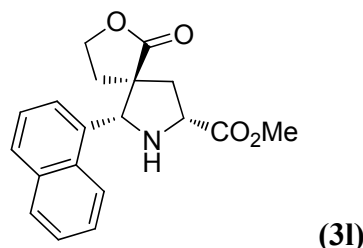

**(5R,6R,8R)-methyl 6-(naphthalen-1-yl)-1-oxo-2-oxa-7-azaspiro[4.4]nonane-8-carboxylate**

### boxylate

The title compound was prepared according to the general procedure as described above in 83% yield.  $[\alpha]_D^{25} = -54.3$  (*c* 1.04, CHCl<sub>3</sub>); <sup>1</sup>H NMR (CDCl<sub>3</sub>, TMS, 300 MHz) δ 8.07-8.03 (m, 2H), 7.87-7.80 (m, 2H), 7.52-7.48 (m, 3H), 5.49 (s, 1H), 4.26-4.21 (m, 1H), 3.89-3.82 (m, 4H), 3.03 (dd, *J*<sub>1</sub> = 7.5 Hz, *J*<sub>2</sub> = 15.9 Hz, 1H), 2.89 (dd, *J*<sub>1</sub> = 9.0 Hz, *J*<sub>2</sub> = 13.2 Hz, 1H), 2.25 (dd, *J*<sub>1</sub> = 6.6 Hz, *J*<sub>2</sub> = 12.9 Hz, 1H), 2.16-2.07 (m, 1H), 1.87-1.80 (m, 1H); <sup>13</sup>C NMR (CDCl<sub>3</sub>, TMS, 75 MHz) 180.8, 173.7, 134.2, 133.6, 131.3, 128.8, 128.6, 126.7, 125.9, 125.3, 125.1, 122.8, 66.0, 62.8, 57.3, 52.3, 51.5, 41.4, 32.6 IR (KBr) ν 3336, 2951, 2815, 2348, 1733, 1526, 1440, 1235, 1215, 1180, 1045, 759 cm<sup>-1</sup>. HRMS: calcd. for C<sub>19</sub>H<sub>19</sub>NO<sub>4</sub> + H<sup>+</sup>: 326.1387, found: 326.1387. The product was analyzed by HPLC to determine the enantiomeric excess: 97% ee (Chiralpak AS-H, *i*-propanol/hexane = 30/70, flow rate 1.0 mL/min, λ = 220 nm); t<sub>r</sub> = 19.41 and 24.37 min.

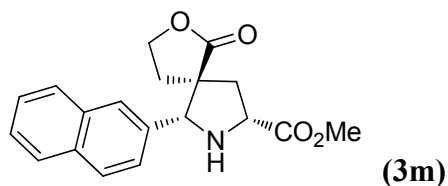

### **(5R,6R,8R)-methyl 6-(naphthalen-2-yl)-1-oxo-2-oxa-7-azaspiro[4.4]nonane-8-carboxylate**

The title compound was prepared according to the general procedure as described above in 85% yield.  $[\alpha]_D^{25} = +44.4$  (*c* 0.75, CHCl<sub>3</sub>); <sup>1</sup>H NMR (CDCl<sub>3</sub>, TMS, 300 MHz) δ 7.93 (s, 1H), 7.82-7.79 (m, 3H), 7.49-7.47 (m, 3H), 4.76 (s, 1H), 4.20-4.16 (m, 1H), 3.93 (dd, *J*<sub>1</sub> = 8.4 Hz, *J*<sub>2</sub> = 14.1 Hz, 1H), 3.82 (s, 3H), 3.20 (dd, *J*<sub>1</sub> = 7.8 Hz, *J*<sub>2</sub> = 15.6 Hz, 1H), 2.82 (dd, *J*<sub>1</sub> = 10.8 Hz, *J*<sub>2</sub> = 12.9 Hz, 1H), 2.27 (dd, *J*<sub>1</sub> = 4.8 Hz, *J*<sub>2</sub> = 13.5 Hz, 1H), 2.19-2.10 (m, 1H), 1.94-1.85 (m, 1H); <sup>13</sup>C NMR (CDCl<sub>3</sub>, TMS, 75 MHz) 180.1, 174.1, 135.0, 133.1, 133.0, 128.2, 128.0, 127.6, 126.3, 126.1, 125.6, 124.8, 68.6, 65.8, 57.1, 52.6, 52.3, 40.8, 31.0; IR (KBr) ν 3356, 2950, 2827, 2365, 1728, 1514, 1245, 1210, 1185, 1031, 756 cm<sup>-1</sup>. HRMS: calcd. for C<sub>19</sub>H<sub>19</sub>NO<sub>4</sub> + H<sup>+</sup>: 326.1389, found: 326.1387. The product was analyzed by HPLC to determine the

enantiomeric excess: 98% ee (Chiralpak AS-H, *i*-propanol/hexane = 30/70, flow rate 1.0 mL/min,  $\lambda = 220$  nm);  $t_r = 21.73$  and 31.28 min.

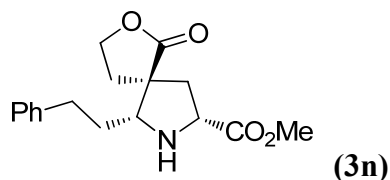

**(5R,6R,8R)-methyl 1-oxo-6-phenethyl-2-oxa-7-azaspiro[4.4]nonane-8-carboxylate**

The title compound was prepared according to the general procedure as described above in 62% yield.  $[\alpha]_D^{25} = +13.5$  (*c* 0.24,  $\text{CHCl}_3$ );  $^1\text{H NMR}$  ( $\text{CDCl}_3$ , TMS, 300 MHz)  $\delta$  7.32-7.27 (m, 2H), 7.22-7.18 (m, 3H), 4.25 (t,  $J = 7.2$  Hz, 2H), 4.00 (dd,  $J_1 = 4.8$  Hz,  $J_2 = 10.2$  Hz, 1H), 3.77 (s, 3H), 3.38-3.34 (m, 1H), 2.88-2.81 (m, 1H), 2.69-2.59 (m, 2H), 2.42-2.32 (m, 1H), 2.09 (dd,  $J_1 = 4.5$  Hz,  $J_2 = 13.5$  Hz, 1H), 1.96-1.87 (m, 1H), 1.80-1.73 (m, 2H);  $^{13}\text{C NMR}$  ( $\text{CDCl}_3$ , TMS, 75 MHz) 179.8, 174.4, 141.2, 128.4, 128.1, 126.0, 65.6, 57.8, 52.3, 51.2, 41.6, 33.4, 32.5, 29.7; IR (KBr)  $\nu$  3349, 2950, 2817, 2321, 1730, 1517, 1446, 1245, 1210, 1186, 1034, 776  $\text{cm}^{-1}$ . HRMS: calcd. for  $\text{C}_{17}\text{H}_{21}\text{NO}_4 + \text{H}^+$ : 304.1541, found: 304.1543. The product was analyzed by HPLC to determine the enantiomeric excess: 99% ee (Chiralpak AD-H, *i*-propanol/hexane = 30/70, flow rate 1.0 mL/min,  $\lambda = 220$  nm);  $t_r = 8.68$  and 21.92 min.

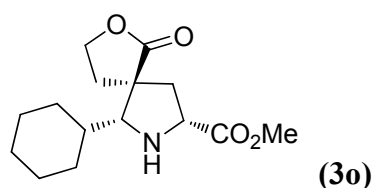

**(5R,6R,8R)-methyl 6-cyclohexyl-1-oxo-2-oxa-7-azaspiro[4.4]nonane-8-carboxylate**

The title compound was prepared according to the general procedure as described above in 65% yield.  $[\alpha]_D^{25} = +16.1$  (*c* 0.74,  $\text{CHCl}_3$ );  $^1\text{H NMR}$  ( $\text{CDCl}_3$ , TMS, 300 MHz)  $\delta$  4.45-4.38 (m, 1H), 4.27-4.18 (m, 1H), 3.97-3.95 (m, 1H), 3.76 (s, 3H), 3.14-3.12 (m, 1H), 2.49-2.14 (m, 4H), 1.99-1.87 (m, 2H), 1.77-1.67 (m, 3H), 1.44-1.29 (m, 2H),

1.19-1.00 (m, 5H);  $^{13}\text{C}$  NMR ( $\text{CDCl}_3$ , TMS, 75 MHz) 180.4, 174.4, 70.1, 65.3, 57.2, 52.3, 49.4, 41.9, 39.1, 31.1, 29.6, 28.5, 25.9, 25.6; IR (KBr)  $\nu$  2972, 2816, 2337, 1725, 1510, 1436, 1215, 1196, 1035, 759  $\text{cm}^{-1}$ . HRMS: calcd. for  $\text{C}_{15}\text{H}_{23}\text{NO}_4 + \text{H}^+$ : 282.1699, found: 282.1700. The product was analyzed by HPLC to determine the enantiomeric excess: 96% ee (Chiralpak AS-H, *i*-propanol/hexane = 20/80, flow rate 1.0 mL/min,  $\lambda$  = 220 nm);  $t_r$  = 15.47 and 17.27 min.

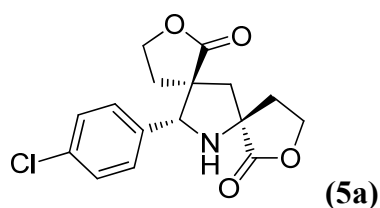

The title compound was prepared according to the general procedure as described above in 82% yield.  $[\alpha]_D^{25} = +27.7$  ( $c$  0.48,  $\text{CHCl}_3$ );  $^1\text{H}$  NMR ( $\text{CDCl}_3$ , TMS, 300 MHz)  $\delta$  7.35 (m, 4H), 4.70 (s, 1H), 4.41-4.28 (m, 2H), 4.03 (dd,  $J_1 = 8.1$  Hz,  $J_2 = 15.0$  Hz, 1H), 3.35 (dd,  $J_1 = 7.8$  Hz,  $J_2 = 16.2$  Hz, 1H), 2.60-2.37 (m, 5H), 2.22-2.15 (m, 2H);  $^{13}\text{C}$  NMR ( $\text{CDCl}_3$ , TMS, 100 MHz)  $\delta$  179.7, 179.0, 135.3, 134.5, 129.1, 128.3, 68.3, 66.3, 65.5, 63.4, 54.7, 47.2, 38.3, 30.7; IR (KBr)  $\nu$  3355, 2951, 2817, 2335, 1737, 1523, 1425, 1240, 1215, 1183, 1021, 776  $\text{cm}^{-1}$ . HRMS: calcd. for  $\text{C}_{16}\text{H}_{16}\text{ClNO}_4 + \text{H}^+$ : 322.0834, found: 322.0841. The product was analyzed by HPLC to determine the enantiomeric excess: >99% ee (Chiralpak AS-H, *i*-propanol/hexane = 50/50, flow rate 1.0 mL/min,  $\lambda$  = 220 nm);  $t_r$  = 20.60 and 24.47 min.

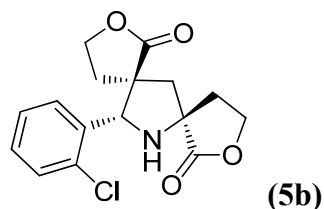

The title compound was prepared according to the general procedure as described above in 80% yield.  $[\alpha]_D^{25} = +10.1$  ( $c$  0.49,  $\text{CHCl}_3$ );  $^1\text{H}$  NMR ( $\text{CDCl}_3$ , TMS, 300 MHz)  $\delta$  7.94 (d,  $J = 7.5$  Hz, 1H), 7.39-7.29 (m, 3H), 5.25 (s, 1H), 4.46-4.27 (m, 2H), 4.09-4.02 (m, 1H), 3.53 (dd,  $J_1 = 7.5$  Hz,  $J_2 = 16.5$  Hz, 1H), 2.80-2.64 (m, 2H), 2.48-2.25 (m, 4H); 2.05-1.93 (m, 1H);  $^{13}\text{C}$  NMR ( $\text{CDCl}_3$ , TMS, 75 MHz) 180.1, 178.8,

136.0, 133.4, 129.5, 129.4, 129.3, 127.0, 66.1, 65.2, 63.9, 63.6, 52.2, 46.9, 36.8, 32.9; IR (KBr)  $\nu$  3350, 2950, 2815, 2327, 1735, 1510, 1445, 1237, 1210, 1197, 1031, 769  $\text{cm}^{-1}$ . HRMS: calcd. for  $\text{C}_{16}\text{H}_{16}\text{ClNO}_4 + \text{H}^+$ : 322.0844, found: 322.0841. The product was analyzed by HPLC to determine the enantiomeric excess: >99% ee (Chiralpak AS-H, *i*-propanol/hexane = 50/50, flow rate 1.0 mL/min,  $\lambda$  = 220 nm);  $t_r$  = 17.23 and 26.81 min.

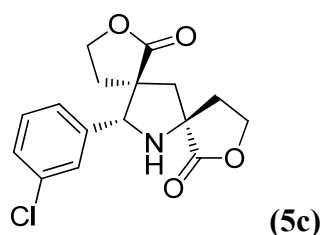

The title compound was prepared according to the general procedure as described above in 81% yield.  $[\alpha]_D^{25} = +36.4$  (*c* 0.57,  $\text{CHCl}_3$ );  $^1\text{H}$  NMR ( $\text{CDCl}_3$ , TMS, 300 MHz)  $\delta$  7.46-7.27 (m, 4H), 4.70 (s, 1H), 4.43-4.30 (m, 2H), 4.05-4.02 (m, 1H), 3.41-3.38 (m, 1H), 2.58-2.37 (m, 5H), 2.22-2.18 (m, 2H);  $^{13}\text{C}$  NMR ( $\text{CDCl}_3$ , TMS, 75 MHz) 179.4, 178.7, 138.9, 134.6, 129.9, 128.6, 126.8, 125.1, 67.9, 66.1, 65.3, 63.0, 54.2, 46.7, 37.9, 30.5; IR (KBr)  $\nu$  3348, 2951, 2816, 2336, 1730, 1511, 1445, 1242, 1220, 1191, 1033, 769  $\text{cm}^{-1}$ . HRMS: calcd. for  $\text{C}_{16}\text{H}_{16}\text{ClNO}_4 + \text{H}^+$ : 322.0825, found: 322.0841. The product was analyzed by HPLC to determine the enantiomeric excess: 99% ee (Chiralpak AS-H, *i*-propanol/hexane = 50/50, flow rate 1.0 mL/min,  $\lambda$  = 220 nm);  $t_r$  = 17.56 and 24.86 min.

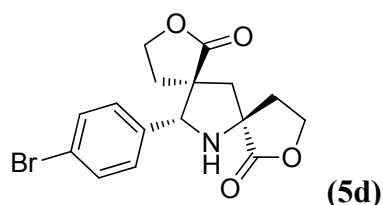

The title compound was prepared according to the general procedure as described above in 84% yield.  $[\alpha]_D^{25} = +26.0$  (*c* 1.16,  $\text{CHCl}_3$ );  $^1\text{H}$  NMR ( $\text{CDCl}_3$ , TMS, 300 MHz)  $\delta$  7.48 (d,  $J$  = 8.4 Hz, 2H), 7.30 (d,  $J$  = 8.4 Hz, 2H), 4.68 (s, 1H), 4.43-4.30 (m, 2H), 4.06-3.98 (m, 1H), 3.35 (dd,  $J_1$  = 7.2 Hz,  $J_2$  = 16.2 Hz, 1H), 2.58-2.36 (m, 5H),

2.20-2.14 (m, 2H);  $^{13}\text{C}$  NMR ( $\text{CDCl}_3$ , TMS, 75 MHz) 179.4, 178.8, 135.7, 131.8, 128.4, 122.3, 68.0, 66.0, 65.3, 63.1, 54.3, 46.9, 38.0, 30.5; IR (KBr)  $\nu$  3340, 2951, 2815, 2337, 1730, 1510, 1425, 1240, 1211, 1185, 1017, 758  $\text{cm}^{-1}$ . The product was analyzed by HPLC to determine the enantiomeric excess: 99% ee (Chiralpak AS-H, *i*-propanol/hexane = 50/50, flow rate 1.0 mL/min,  $\lambda$  = 220 nm);  $t_r$  = 19.63 and 23.89 min.

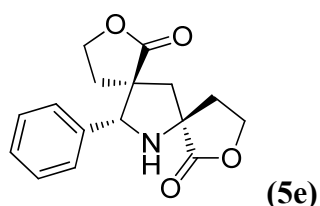

The title compound was prepared according to the general procedure as described above in 83% yield.  $[\alpha]_D^{25} = +23.1$  ( $c$  0.86,  $\text{CHCl}_3$ );  $^1\text{H}$  NMR ( $\text{CDCl}_3$ , TMS, 300 MHz)  $\delta$  7.39-7.35 (m, 5H), 4.70 (s, 1H), 4.43-4.31 (m, 2H), 4.05-3.96 (m, 1H), 3.20 (dd,  $J_1 = 7.8$  Hz,  $J_2 = 16.5$  Hz, 1H), 2.65-2.26 (m, 6H), 2.17-2.07 (m, 1H);  $^{13}\text{C}$  NMR ( $\text{CDCl}_3$ , TMS, 75 MHz) 179.7, 179.0, 136.2, 128.5, 128.4, 126.5, 68.6, 65.9, 65.3, 63.1, 54.5, 47.2, 37.9, 30.6; IR (KBr)  $\nu$  3365, 2951, 2816, 2340, 1733, 1516, 1425, 1243, 1211, 1176, 1018, 779  $\text{cm}^{-1}$ . HRMS: calcd. for  $\text{C}_{16}\text{H}_{17}\text{NO}_4 + \text{H}^+$ : 288.1233, found: 288.1230. The product was analyzed by HPLC to determine the enantiomeric excess: >99% ee (Chiralpak AS-H, *i*-propanol/hexane = 50/50, flow rate 1.0 mL/min,  $\lambda$  = 220 nm);  $t_r$  = 18.66 and 23.12 min.

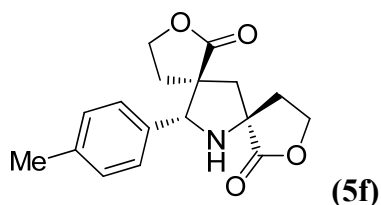

The title compound was prepared according to the general procedure as described above in 75% yield.  $[\alpha]_D^{25} = +26.0$  ( $c$  0.9,  $\text{CHCl}_3$ );  $^1\text{H}$  NMR ( $\text{CDCl}_3$ , TMS, 300 MHz)  $\delta$  7.27 (d,  $J = 7.8$  Hz, 2H), 7.16 (d,  $J = 7.8$  Hz, 2H), 4.64 (s, 1H), 4.44-4.39 (m, 1H), 4.35-4.27 (m, 1H), 4.01-3.94 (m, 1H), 3.20 (dd,  $J_1 = 7.8$  Hz,  $J_2 = 16.8$  Hz, 1H), 2.62-2.45 (m, 4H), 2.38-2.25 (m, 5H), 2.14-2.04 (m, 1H);  $^{13}\text{C}$  NMR ( $\text{CDCl}_3$ , TMS, 75

MHz) 179.7, 179.0, 138.1, 133.0, 129.2, 126.4, 68.6, 66.0, 65.4, 63.1, 54.5, 47.3, 38.0, 30.6, 21.0; IR (KBr)  $\nu$  3349, 2943, 2812, 2340, 1726, 1516, 1240, 1211, 1172, 1018, 769  $\text{cm}^{-1}$ . HRMS: calcd. for  $\text{C}_{17}\text{H}_{19}\text{NO}_4 + \text{H}^+$ : 302.1392, found: 302.1387. The product was analyzed by HPLC to determine the enantiomeric excess: >99% ee (Chiralpak AS-H, *i*-propanol/hexane = 50/50, flow rate 1.0 mL/min,  $\lambda$  = 220 nm);  $t_r$  = 16.60 and 24.67 min.

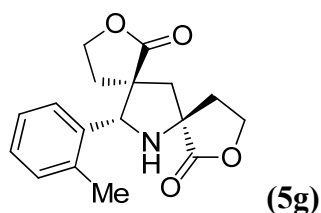

The title compound was prepared according to the general procedure as described above in 68% yield.  $[\alpha]_D^{25} = +28.8$  (*c* 0.87,  $\text{CHCl}_3$ );  $^1\text{H}$  NMR ( $\text{CDCl}_3$ , TMS, 300 MHz)  $\delta$  7.75-7.72 (m, 1H), 7.28-7.17 (m, 3H), 4.99 (s, 1H), 4.42-4.38 (m, 1H), 4.34-4.29 (m, 1H), 4.01-3.94 (m, 1H), 3.24-3.16 (m, 1H), 2.68-2.63 (m, 2H), 2.49-2.30 (m, 7H), 2.10-2.03 (m, 1H);  $^{13}\text{C}$  NMR ( $\text{CDCl}_3$ , TMS, 75 MHz) 180.4, 179.0, 136.3, 134.8, 130.9, 128.0, 126.9, 126.0, 66.3, 65.3, 64.0, 63.3, 52.9, 47.6, 37.4, 32.3, 31.9, 19.4; IR (KBr)  $\nu$  3362, 2950, 2825, 2331, 1731, 1517, 1420, 1241, 1210, 1182, 1016, 768  $\text{cm}^{-1}$ . HRMS: calcd. for  $\text{C}_{17}\text{H}_{19}\text{NO}_4 + \text{H}^+$ : 302.1382, found: 302.1387. The product was analyzed by HPLC to determine the enantiomeric excess: >99% ee (Chiralpak AS-H, *i*-propanol/hexane = 50/50, flow rate 1.0 mL/min,  $\lambda$  = 220 nm);  $t_r$  = 14.73 and 17.72 min.

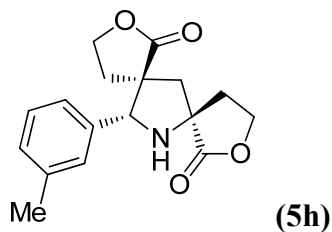

The title compound was prepared according to the general procedure as described above in 75% yield.  $[\alpha]_D^{25} = +19.0$  (*c* 0.81,  $\text{CHCl}_3$ );  $^1\text{H}$  NMR ( $\text{CDCl}_3$ , TMS, 300 MHz)  $\delta$  7.27-7.13 (m, 4H), 4.65 (s, 1H), 4.44-4.30 (m, 2H), 4.01-3.95 (m, 1H), 3.25-3.22 (m, 1H), 2.63-2.45 (m, 4H), 2.39-2.26 (m, 5H), 2.15-2.08 (m, 1H);  $^{13}\text{C}$  NMR ( $\text{CDCl}_3$ ,



TMS, 75 MHz) 179.8, 179.0, 138.3, 136.0, 129.1, 128.4, 127.1, 123.6, 68.7, 66.0, 65.4, 63.2, 54.5, 47.4, 38.0, 30.7, 21.3; IR (KBr)  $\nu$  3355, 2951, 2830, 2335, 1731, 1520, 1438, 1241, 1210, 1196, 1031, 766  $\text{cm}^{-1}$ . HRMS: calcd. for  $\text{C}_{17}\text{H}_{19}\text{NO}_4 + \text{Na}^+$ : 324.1203, found: 324.1206. The product was analyzed by HPLC to determine the enantiomeric excess: >99% ee (Chiralpak AS-H, *i*-propanol/hexane = 50/50, flow rate 1.0 mL/min,  $\lambda$  = 220 nm);  $t_r$  = 13.18 and 18.32 min.

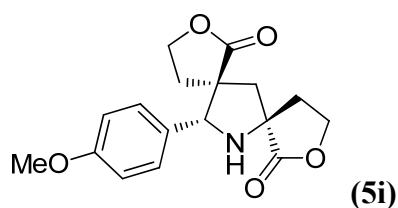

The title compound was prepared according to the general procedure as described above in 80% yield.  $d [\alpha]^{25}_D = +23.3$  ( $c$  0.79,  $\text{CHCl}_3$ );  $^1\text{H}$  NMR ( $\text{CDCl}_3$ , TMS, 300 MHz)  $\delta$  7.31 (d,  $J$  = 8.7 Hz, 2H), 6.88 (d,  $J$  = 7.8 Hz, 2H), 4.63 (s, 1H), 4.44-4.30 (m, 2H), 4.02-3.95 (m, 1H), 3.80 (s, 3H), 3.20 (dd,  $J_1$  = 7.5 Hz,  $J_2$  = 16.5 Hz, 1H), 2.61-2.52 (m, 4H), 2.37-2.26 (m, 2H), 2.15-2.07 (m, 1H);  $^{13}\text{C}$  NMR ( $\text{CDCl}_3$ , TMS, 75 MHz) 179.8, 179.0, 159.5, 128.0, 127.7, 113.9, 68.4, 66.0, 65.4, 63.1, 55.2, 54.5, 47.2, 38.0, 30.6; IR (KBr)  $\nu$  2953, 2821, 2351, 1734, 1503, 1429, 1238, 1211, 1190, 1033, 768  $\text{cm}^{-1}$ . HRMS: calcd. for  $\text{C}_{17}\text{H}_{19}\text{NO}_5 + \text{Na}^+$ : 340.1163, found: 340.1155. The product was analyzed by HPLC to determine the enantiomeric excess: >99% ee (Chiralpak AS-H, *i*-propanol/hexane = 50/50, flow rate 1.0 mL/min,  $\lambda$  = 220 nm);  $t_r$  = 34.64 and 61.59 min.

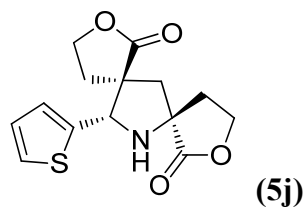

The title compound was prepared according to the general procedure as described above in 84% yield.  $[\alpha]^{25}_D = +45.5$  ( $c$  0.80,  $\text{CHCl}_3$ );  $^1\text{H}$  NMR ( $\text{CDCl}_3$ , TMS, 300 MHz)  $\delta$  7.29-7.27 (m, 1H), 7.04-7.02 (m, 2H), 4.93 (s, 1H), 4.43-4.38 (m, 1H), 4.35-4.30 (m, 1H), 4.10-4.05 (m, 1H), 3.52 (dd,  $J_1$  = 7.5 Hz,  $J_2$  = 15.9 Hz, 1H), 2.59-2.39 (m,

6H), 2.25-2.15 (m, 1H);  $^{13}\text{C}$  NMR ( $\text{CDCl}_3$ , TMS, 75 MHz) 179.2, 178.5, 139.5, 127.2, 125.2, 125.1, 66.2, 65.4, 63.3, 55.0, 46.9, 38.1, 30.7; IR (KBr)  $\nu$  3340, 2951, 2810, 2340, 1730, 1503, 1426, 1244, 1212, 1186, 1016, 778  $\text{cm}^{-1}$ . HRMS: calcd. for  $\text{C}_{14}\text{H}_{15}\text{NO}_4\text{S} + \text{H}^+$ : 294.0803, found: 294.0795. The product was analyzed by HPLC to determine the enantiomeric excess: >99% ee (Chiralpak OD-H, *i*-propanol/hexane = 40/60, flow rate 1.0 mL/min,  $\lambda$  = 220 nm);  $t_r$  = 14.45 and 17.52 min.

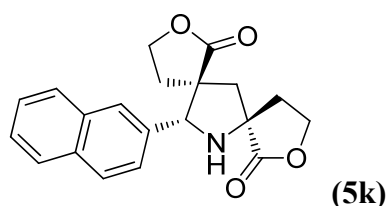

The title compound was prepared according to the general procedure as described above in 82% yield.  $[\alpha]_D^{25} = +50.4$  ( $c$  0.36,  $\text{CHCl}_3$ );  $^1\text{H}$  NMR ( $\text{CDCl}_3$ , TMS, 300 MHz)  $\delta$  7.90-7.80 (m, 4H), 7.51-7.43 (m, 3H), 4.87 (s, 1H), 4.46-4.40 (m, 1H), 4.36-4.30 (m, 1H), 3.97-3.90 (m, 1H), 3.19 (dd,  $J_1 = 8.1$  Hz,  $J_2 = 16.8$  Hz, 1H), 2.65-2.44 (m, 4H), 2.43-2.38 (m, 1H), 2.32-2.25 (m, 1H), 2.17-2.10 (m, 1H);  $^{13}\text{C}$  NMR ( $\text{CDCl}_3$ , TMS, 75 MHz) 179.9, 179.0, 138.3, 133.8, 133.0, 128.5, 128.0, 127.6, 126.5, 126.4, 125.5, 124.5, 68.9, 66.1, 65.5, 63.3, 54.6, 47.4, 38.1, 30.7; IR (KBr)  $\nu$  3350, 2950, 2819, 2340, 1735, 1506, 1428, 1238, 1205, 1179, 1026, 768  $\text{cm}^{-1}$ . HRMS: calcd. for  $\text{C}_{20}\text{H}_{19}\text{NO}_4 + \text{H}^+$ : 338.1393, found: 338.1387. The product was analyzed by HPLC to determine the enantiomeric excess: >99% ee (Chiralpak AS-H, *i*-propanol/hexane = 50/50, flow rate 1.0 mL/min,  $\lambda$  = 220 nm);  $t_r$  = 19.56 and 39.97 min.

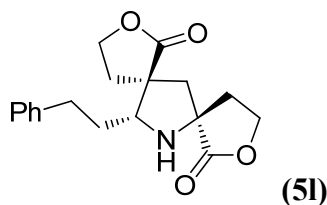

The title compound was prepared according to the general procedure as described above in 60% yield.  $[\alpha]_D^{25} = +53.0$  ( $c$  1.15,  $\text{CHCl}_3$ );  $^1\text{H}$  NMR ( $\text{CDCl}_3$ , TMS, 300 MHz)  $\delta$  7.31-7.17 (m, 5H), 4.44-4.37 (m, 1H), 4.29-4.24 (m, 3H), 3.39 (dd,  $J_1 = 4.5$  Hz,  $J_2 = 9.3$  Hz, 1H), 2.85-2.80 (m, 1H), 2.62-2.50 (m, 1H), 2.45-2.34 (m, 5H), 2.20-2.11 (m,

2H), 1.85-1.77 (m, 2H);  $^{13}\text{C}$  NMR ( $\text{CDCl}_3$ , TMS, 75 MHz) 179.9, 179.4, 141.2, 128.4, 128.3, 126.1, 74.0, 65.9, 64.5, 53.5, 47.5, 38.5, 33.4, 32.2, 29.6; IR (KBr)  $\nu$  3350, 2946, 2826, 2336, 1735, 1510, 1446, 1235, 1215, 1036, 769  $\text{cm}^{-1}$ . HRMS: calcd. for  $\text{C}_{18}\text{H}_{21}\text{NO}_4 + \text{H}^+$ : 316.1544, found: 316.1543. The product was analyzed by HPLC to determine the enantiomeric excess: 99% ee (Chiralpak AS-H, *i*-propanol/hexane = 50/50, flow rate 1.0 mL/min,  $\lambda = 220$  nm);  $t_r = 21.36$  and 25.61 min.

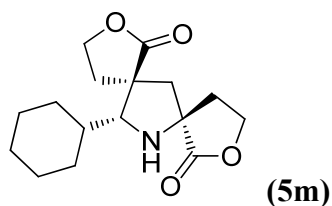

The title compound was prepared according to the general procedure as described above in 67% yield.  $[\alpha]_D^{25} = +15.3$  ( $c$  0.26,  $\text{CHCl}_3$ );  $^1\text{H}$  NMR ( $\text{CDCl}_3$ , TMS, 300 MHz)  $\delta$  4.49-4.37 (m, 2H), 4.28-4.18 (m, 2H), 3.21-3.18 (m, 1H), 2.46-2.33 (m, 4H), 2.27-2.16 (m, 2H), 2.00-1.95 (m, 2H), 1.73-1.68 (m, 3H), 1.43-1.40 (m, 2H), 1.26-1.00 (m, 5H);  $^{13}\text{C}$  NMR ( $\text{CDCl}_3$ , TMS, 75 MHz) 180.3, 179.6, 70.6, 65.8, 65.7, 64.0, 52.2, 48.5, 39.0, 35.6, 31.5, 29.8, 28.1, 26.0, 25.7; IR (KBr)  $\nu$  2951, 2823, 2335, 1737, 1445, 1228, 1219, 1190, 1035, 759  $\text{cm}^{-1}$ . HRMS: calcd. for  $\text{C}_{16}\text{H}_{23}\text{NO}_4 + \text{H}^+$ : 294.1706, found: 294.1700. The product was analyzed by HPLC to determine the enantiomeric excess: 97% ee (Chiralpak AS-H, *i*-propanol/hexane = 50/50, flow rate 1.0 mL/min,  $\lambda = 220$  nm);  $t_r = 10.68$  and 19.60 min.

## V. Proposed Transition States of the *exo*-Selectivity for Asymmetric 1,3-Dipolar Cycloaddition of Imino Esters with $\alpha$ -Methylene- $\gamma$ -butyrolactone.

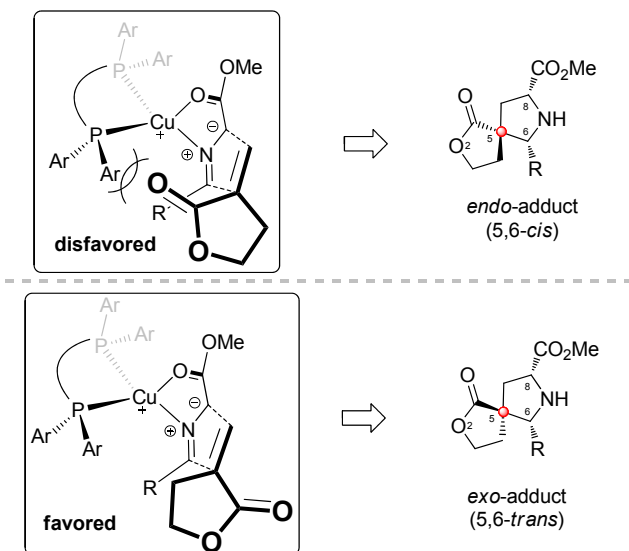

**Scheme S1.** Proposed transition states.

Based on the relative and absolute configuration of cycloadduct (*7R,9R,13S*)-**5a**, the high *exo*-selectivity observed in the Cu(I)/(*R*)-DTBM-BIPHEP (**L5**) catalyzed asymmetric 1,3-DC reaction of imino ester with  $\alpha$ -methylene- $\gamma$ -butyrolactone can be rationalized by the proposed transition states in Scheme S1. The active species is a copper(I) complex having bulky and electron-donating bisphosphine ligand and an *in situ*-formed azomethine ylide in tetrahedral configuration.<sup>2</sup> An *exo* approach of  $\alpha$ -methylene- $\gamma$ -butyrolactone to the copper(I) complex occurred predominantly because of the disfavored steric repulsion generated in the corresponding *endo* approach between the substituents of  $\alpha$ -methylene- $\gamma$ -butyrolactone and the large bulky aryl group on the phosphorus atom of the chiral ligand.

## VI. $^{31}\text{P}$ NMR Spectra of (*R*)-DTBM-BIPHEP $\text{Cu}(\text{MeCN})_4\text{BF}_4$ complex

a) Free ligand (*R*)-DTBM-BIPHEP

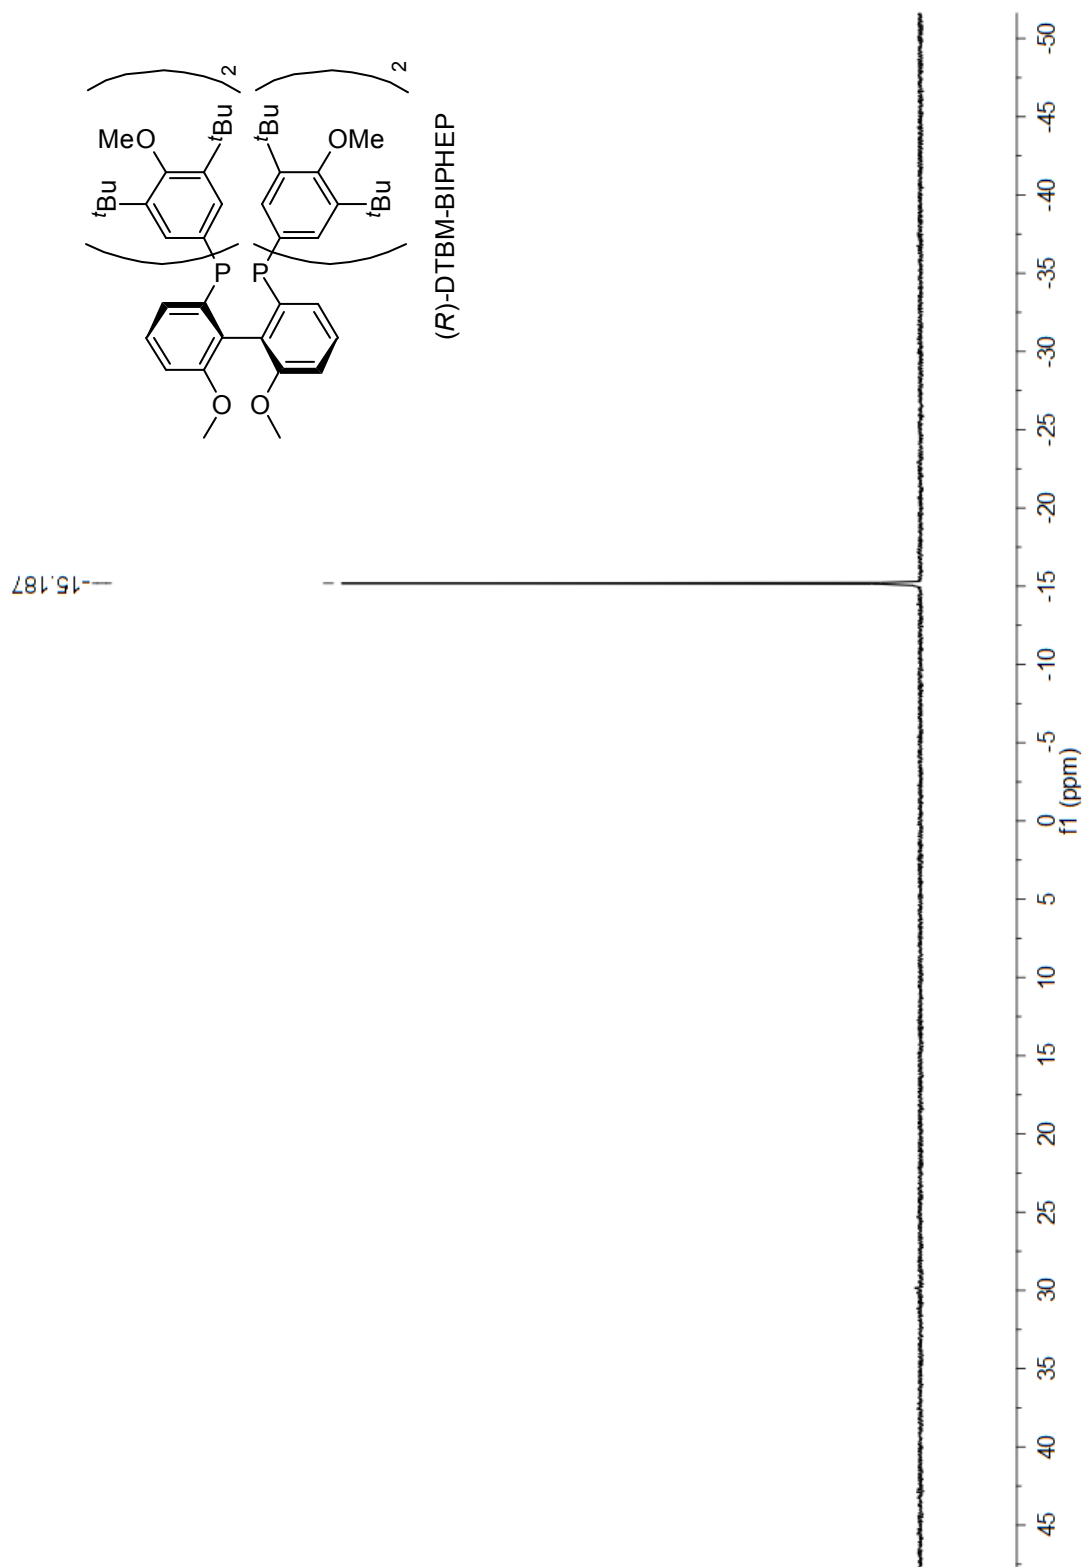

**Figure S1.**  $^{31}\text{P}$  NMR spectrum of free ligand (*R*)-DTBM-BIPHEP in  $\text{CDCl}_3$ .

b)  $\text{Cu}(\text{MeCN})_4\text{BF}_4:(R)\text{-DTBM-BIPHEP} = 1:1$

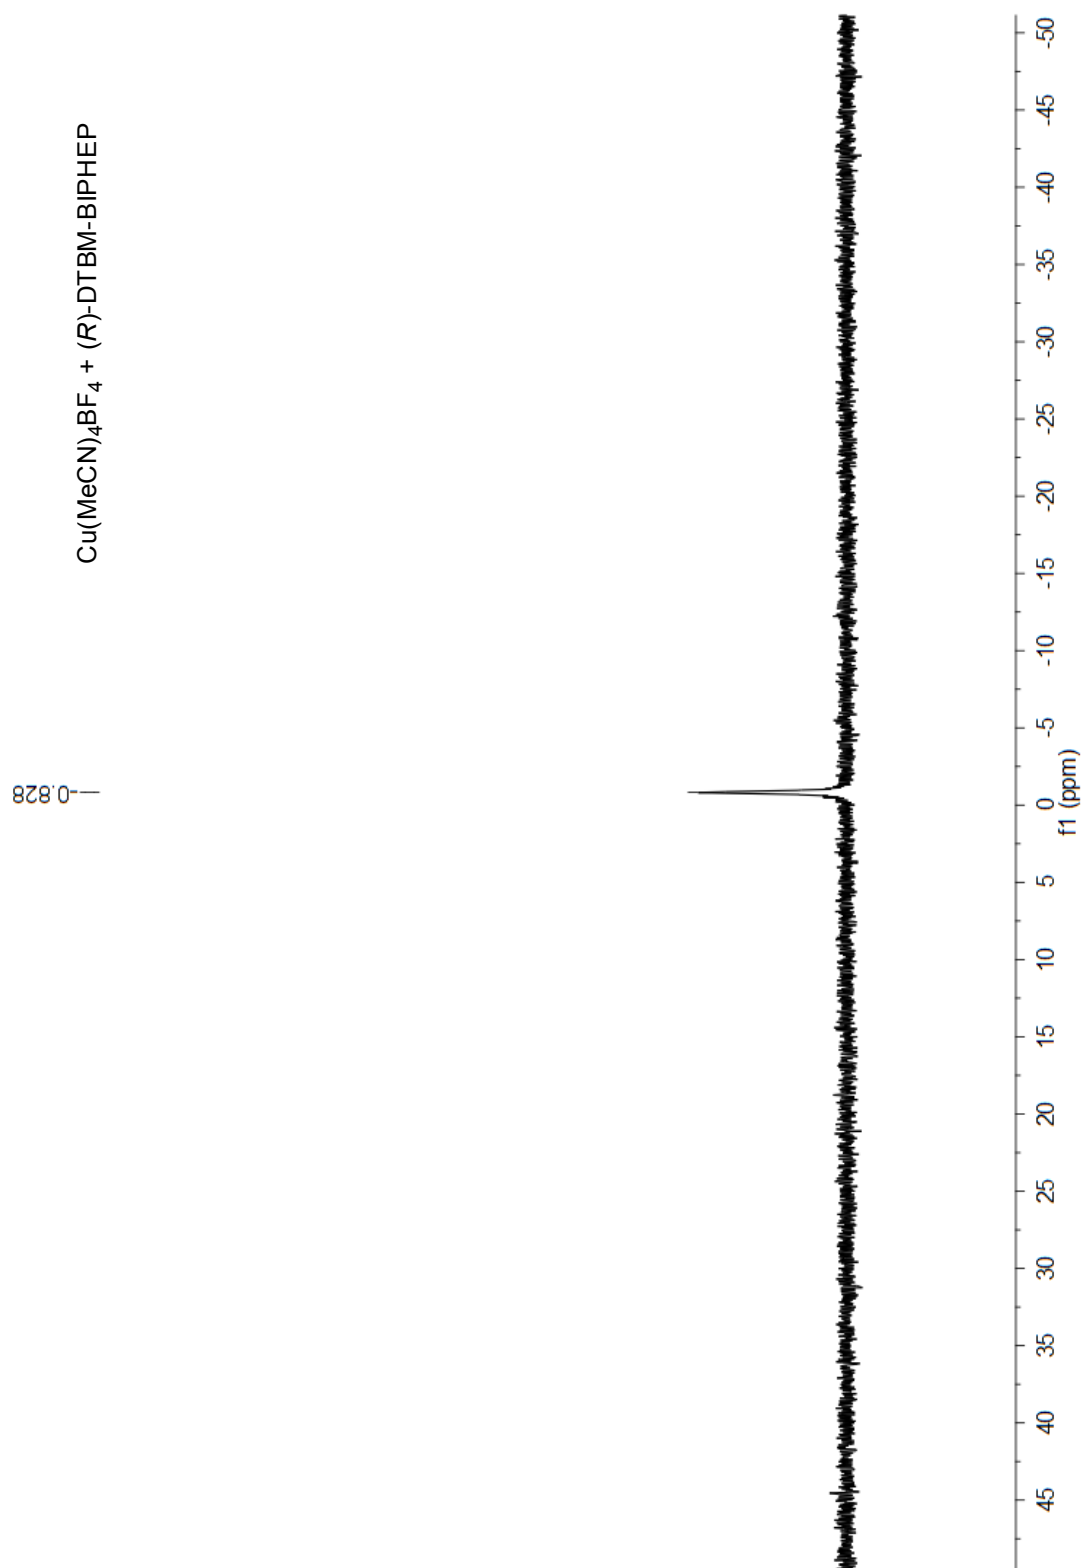

**Figure S2.**  $^{31}\text{P}$  NMR spectrum of  $(R)\text{-DTBM-BIPHEP}/\text{Cu}(\text{MeCN})_4\text{BF}_4$  (1:1) complex  
in  $\text{CDCl}_3$

The catalyst structure was examined by  $^{31}\text{P}$  NMR study. As shown in Figure 1,  $^{31}\text{P}$  NMR spectrum of free ligand (*R*)-DTBM-BIPHEP in  $\text{CDCl}_3$  showed a singlet peak at -15.19 ppm. After addition of 1 equiv of  $\text{Cu}(\text{MeCN})_4\text{BF}_4$  to the solution, a new single peak at -0.83 ppm was observed with disappearance of the free ligand peak (Figure 2). It showed that (*R*)-DTBM-BIPHEP/ $\text{Cu}(\text{MeCN})_4\text{BF}_4$  complex formed.

## VII. References

1. J. Zhou, A. M. Schmidt, H. Ritter, *Macromolecules* **2010**, *43*, 939-942.
2. Y. Oderaotshi, W. Cheng, S. Fujitomi, Y. Kasano, S. Minakata and M. Komatsu, *Org. Lett.*, **2003**, *5*, 5043.

### VIII. $^1\text{H}$ NMR and $^{13}\text{C}$ NMR Spectra.

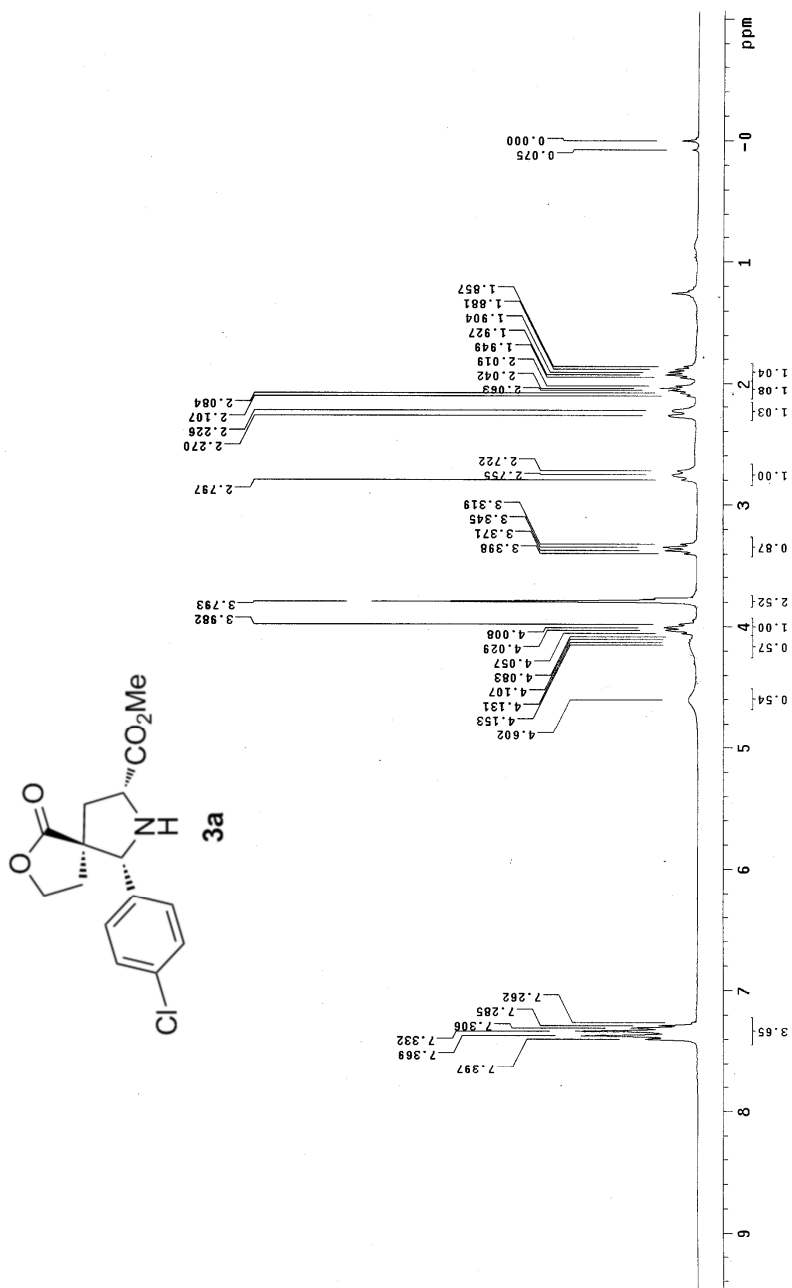

111-13-4a



c13-1qh-5-123e

Solvent: CDCl3  
Ambient temperature  
Mercury-3000  
Relax. delay 1.000 sec  
Pulse 28.0 degrees  
Acq. time 0.500 sec  
Vdth 17893.1 Hz  
SFO 300.136300 MHz  
OBSERVE P13, 75.4552791 MHz  
DECOUPLE H1, 300.0815462 MHz  
Power 40 dB  
CPL 13 on  
WALTZ-16 modulated  
DATA PROCESSING  
Line broadening 4.0 Hz  
F1 size 32760  
Total time 4 hr, 35 min, 1 sec

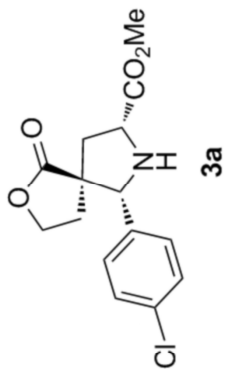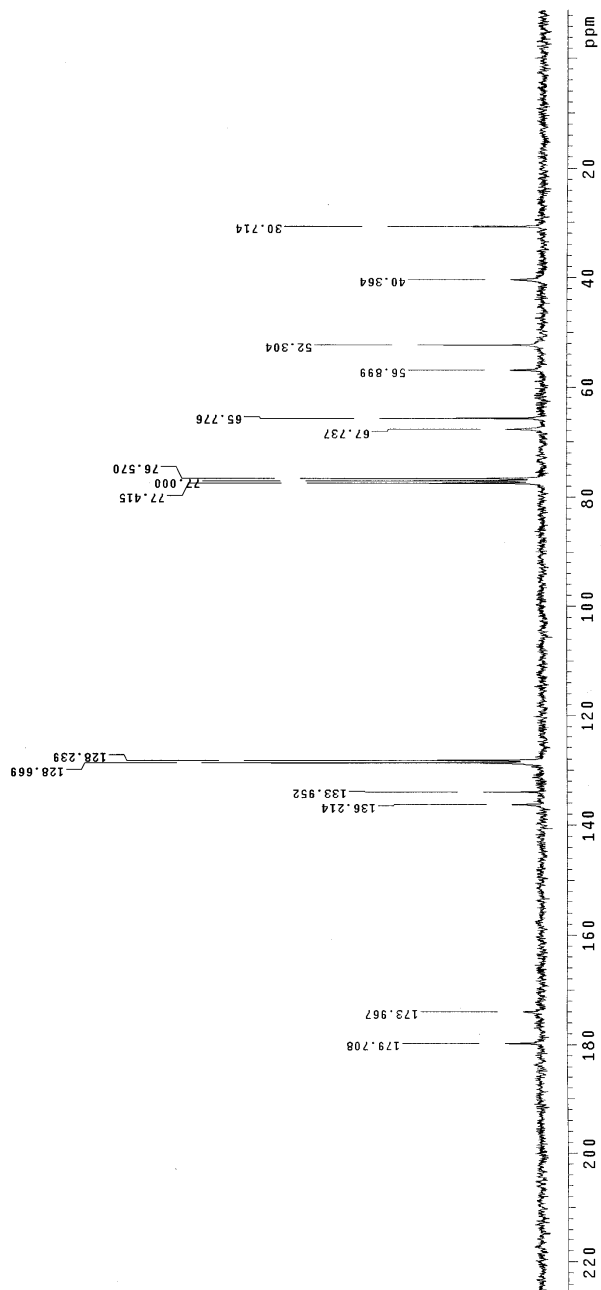

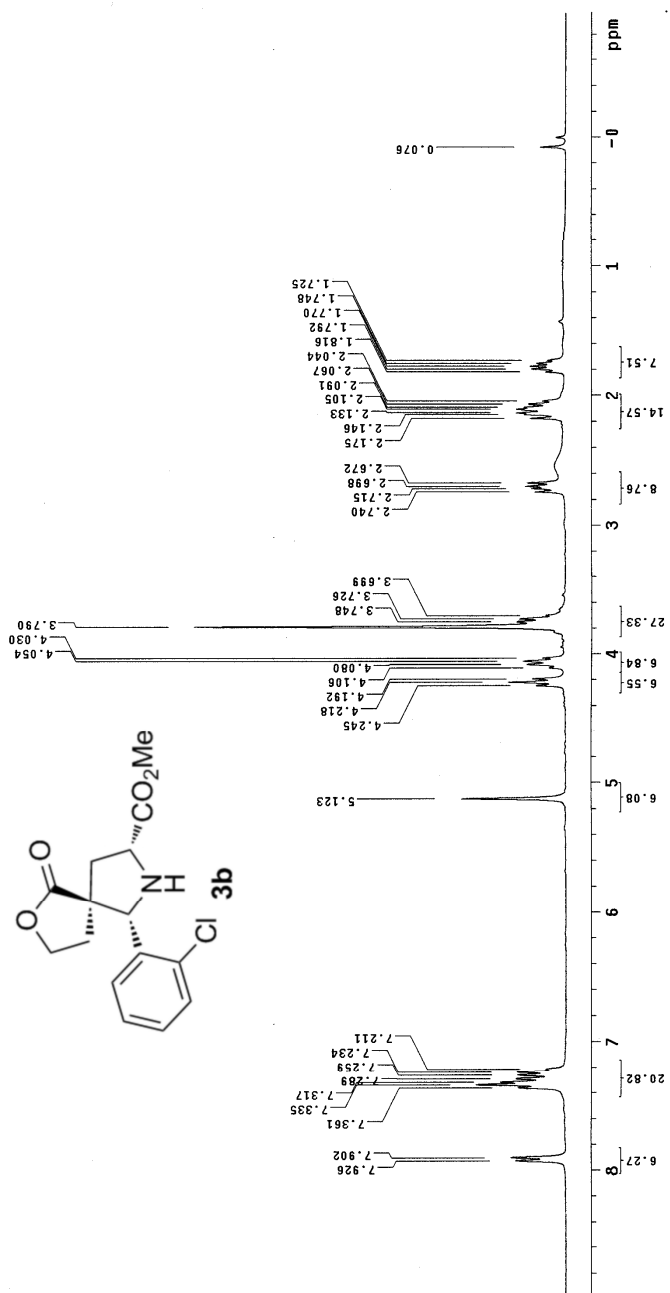

c13-lhp-5-126a-1

Solvent: CDCl<sub>3</sub>  
Ambient temperature  
Mercury-300BB "mercury300"  
Relax. delay 1.000 sec  
Acq. time 28.0527 sec  
Acq. date 06/05/13  
Width 17291.3 Hz  
1024 repetitions  
OBSWID 4552619 MHz  
PULSE PRG 300.0016831 MHz  
Power 39 dB  
continuously on  
WALTZ16 modulated  
DUAL F2 on  
Line broadening 4.0 Hz  
FT size 32768  
Total time 28 min, 55 sec

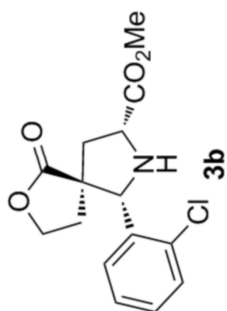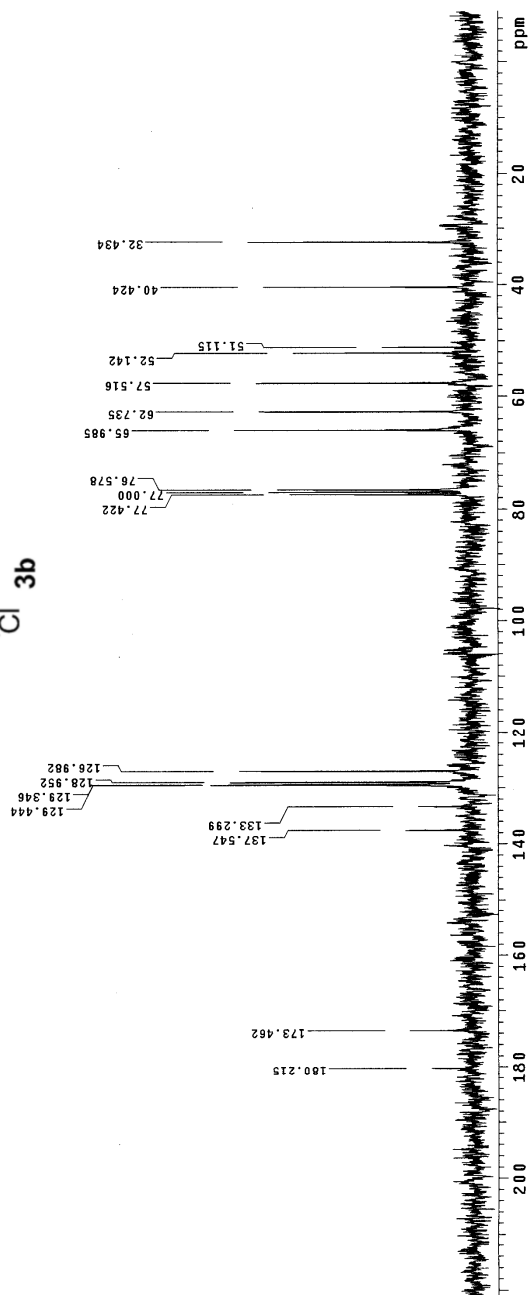

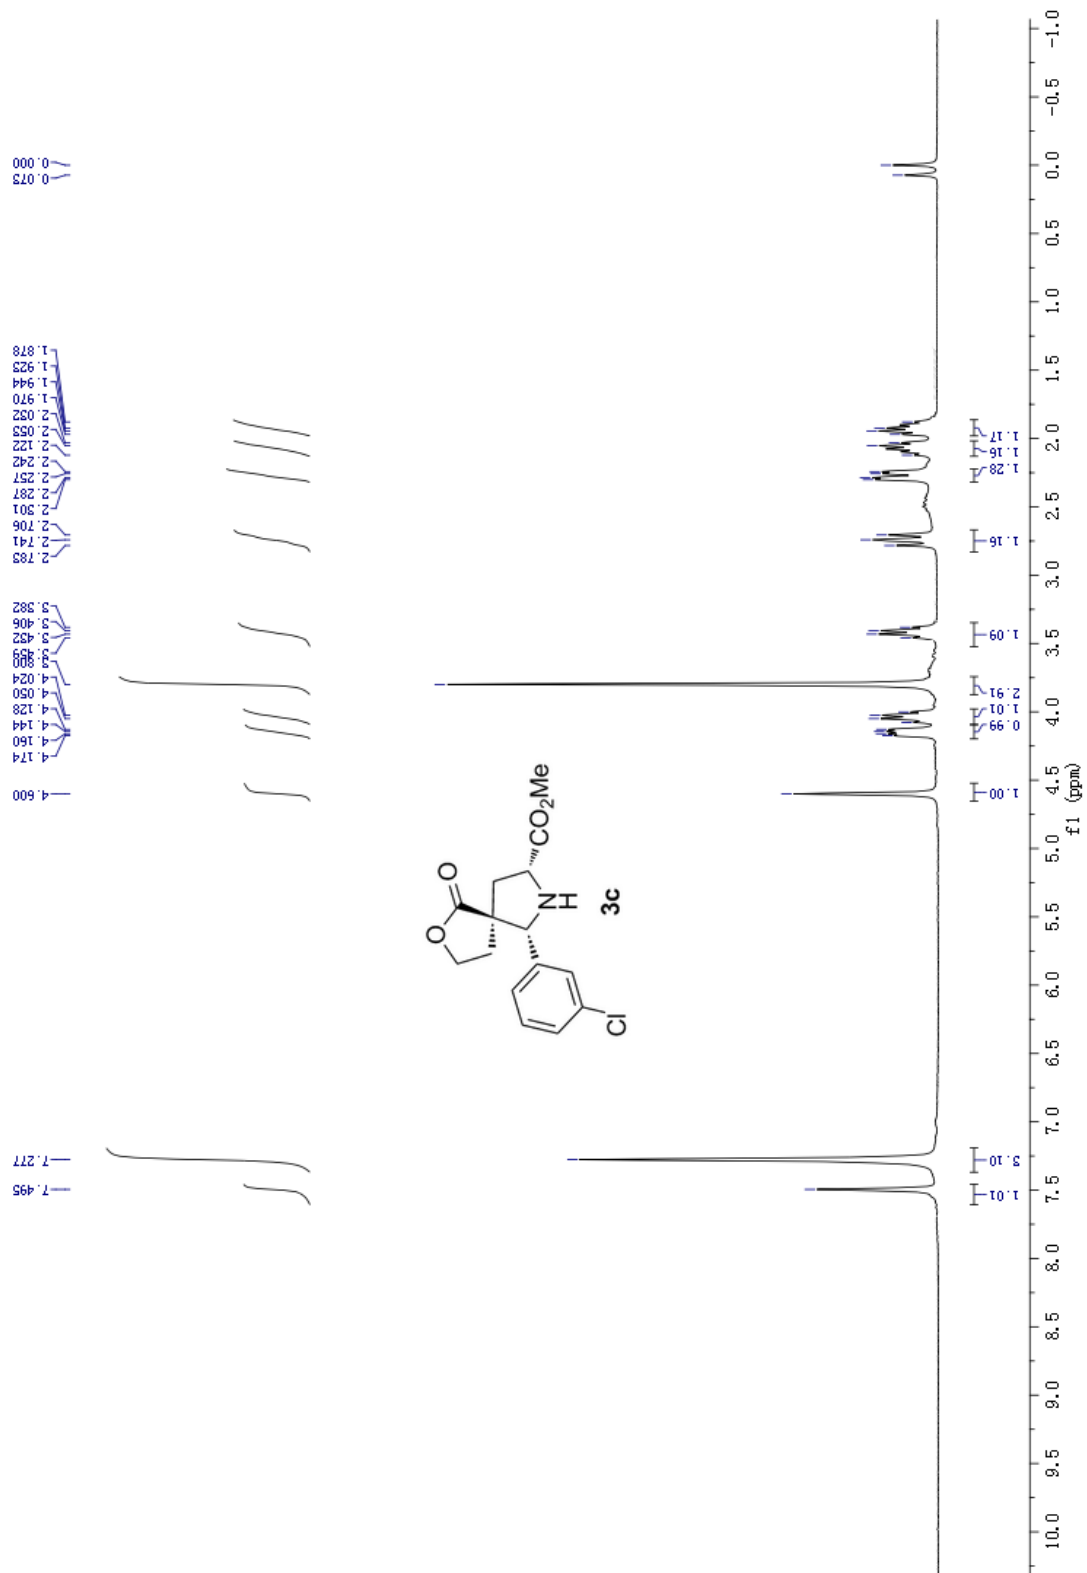

c13-14h-5-121c

Solvent: CDCl3  
Pulse program: zgpg30  
MERCURY-300B "mercury300"  
Relax. delay 1.000 sec  
Pulse 28.0 degrees  
Acq. time 0.500 sec  
V2 128  
128 repetitions  
OBSERVE C13, 75.4553072 MHZ  
DECOUPLE H1, 300.0815462 MHZ  
Power 10.00 dB on  
WALTZ-16 modulated  
DATA PROCESSING  
Line broadening 4.0 Hz  
SFO 125.762744  
Total time 4 hr, 35 min, 1 sec

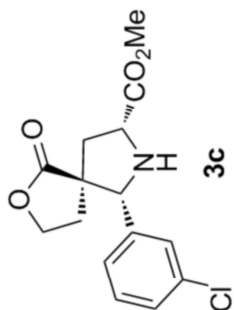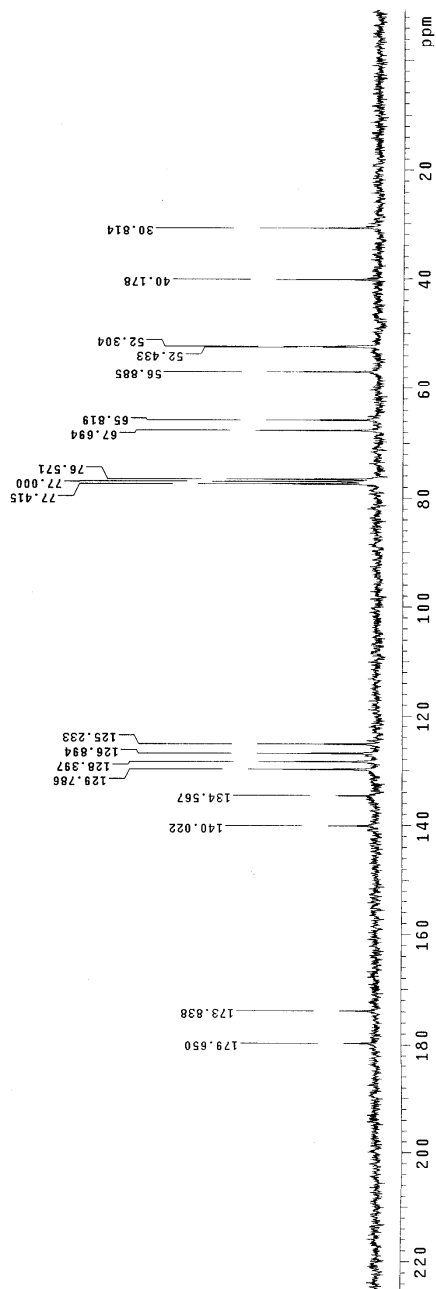

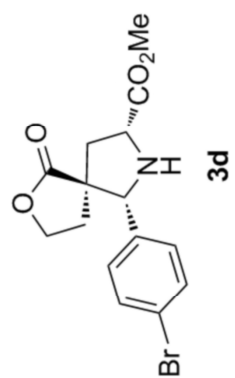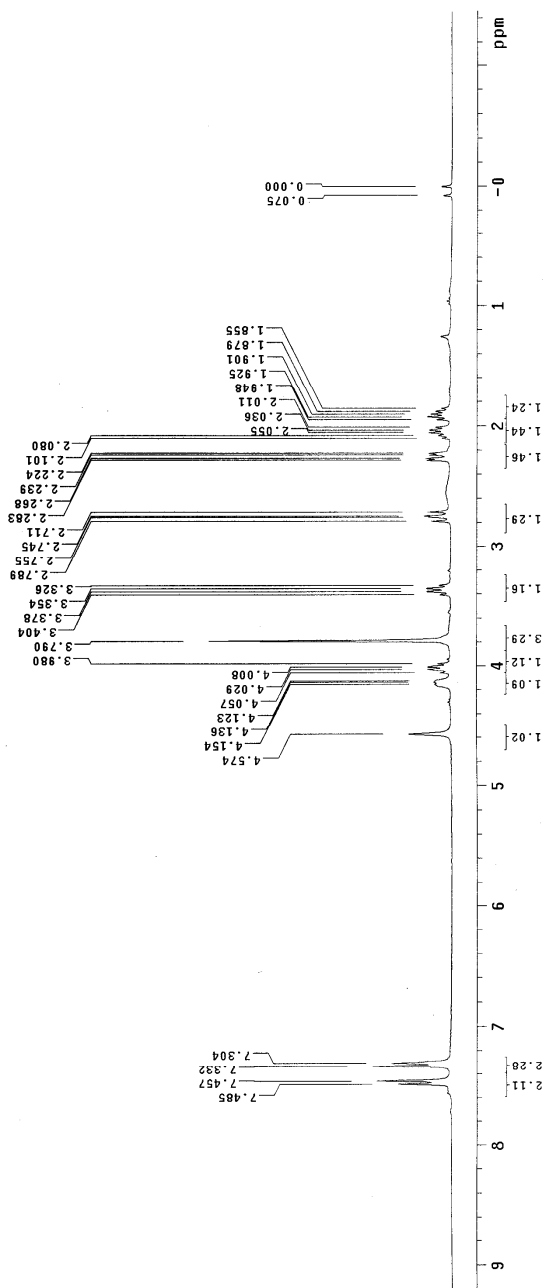

1qht-5-117c

c13-10h-5-117c

Solvent: CDCl<sub>3</sub>  
Ambient temperature  
Mercury-300BB "mercury300"

Relax. delay 1.000 sec  
Acq. time 0.500 sec  
Width 17698.1 Hz  
228 repetitions  
DECUPLE CH, 300.0815462 MHz  
Power 40 dB  
continuously on  
WALTZ16B ROUTED  
DQ1  
Line broadening 4.0 Hz  
FT size 32768  
Total time 4 hr, 35 min, 1 sec

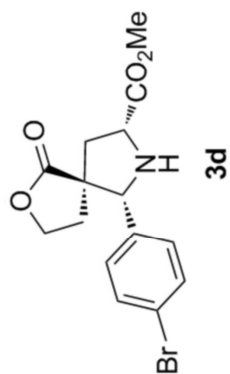

3d

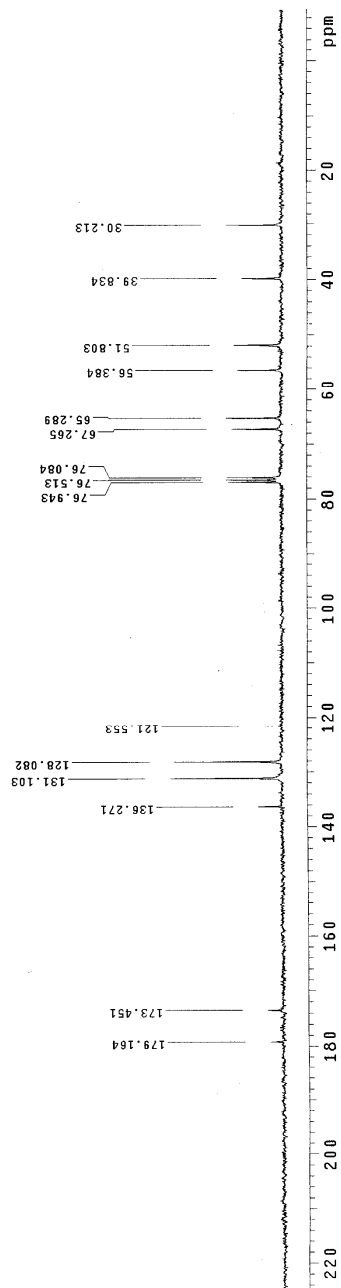

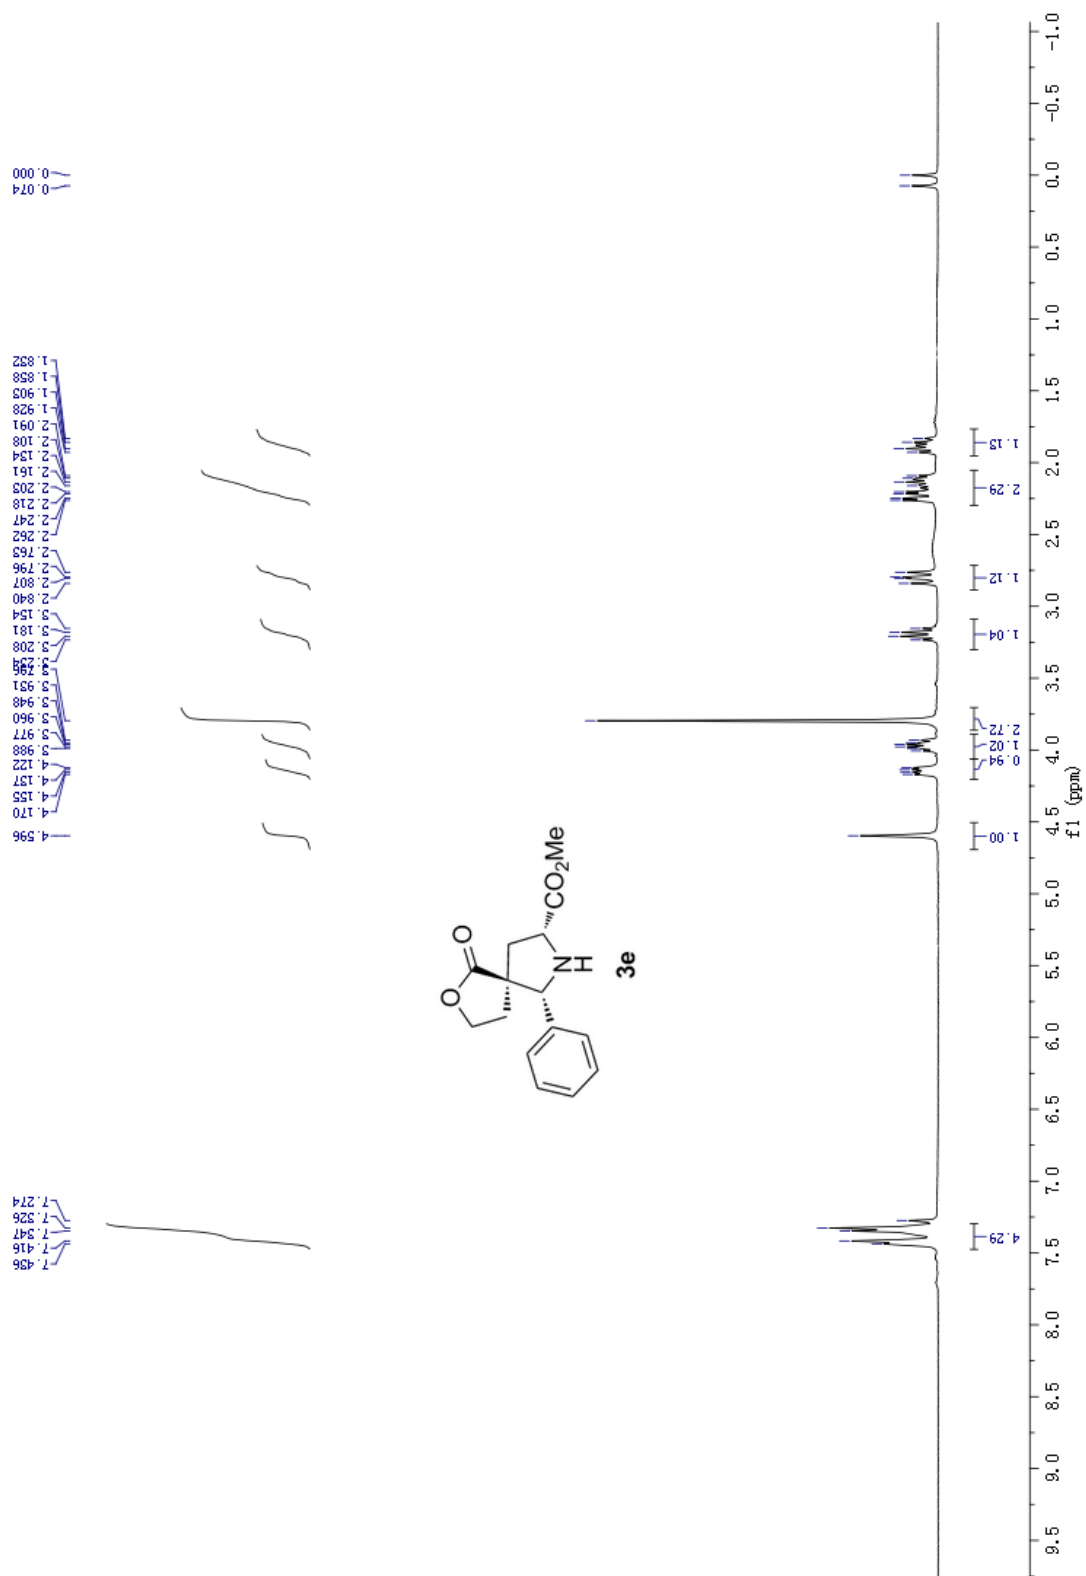



c13-1qh-5-124a

Solvent: CDCl3  
Acquisition Temperature:  
Mercury-300BB "Mercury300"  
Relax. delay 1.000 sec  
Pulse 28.0 degrees  
Acq. time 0.500 sec  
Vid frequency 125.761 MHz  
Vid resolution 160.000 Hz  
OBSERVE C13, 75.4552353 MHz  
DECOUPLE H1, 300.0615462 MHz  
Power 40.000 dB  
Pulse program: zgpg30  
WALTZ-16 modulated  
DATA PROCESSING  
Line broadening 4.0 Hz  
SI 327.4  
Total time 4 hr, 35 min, 1 sec

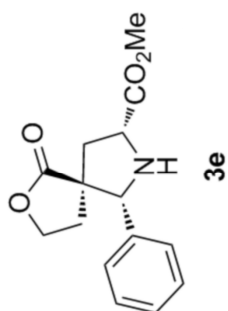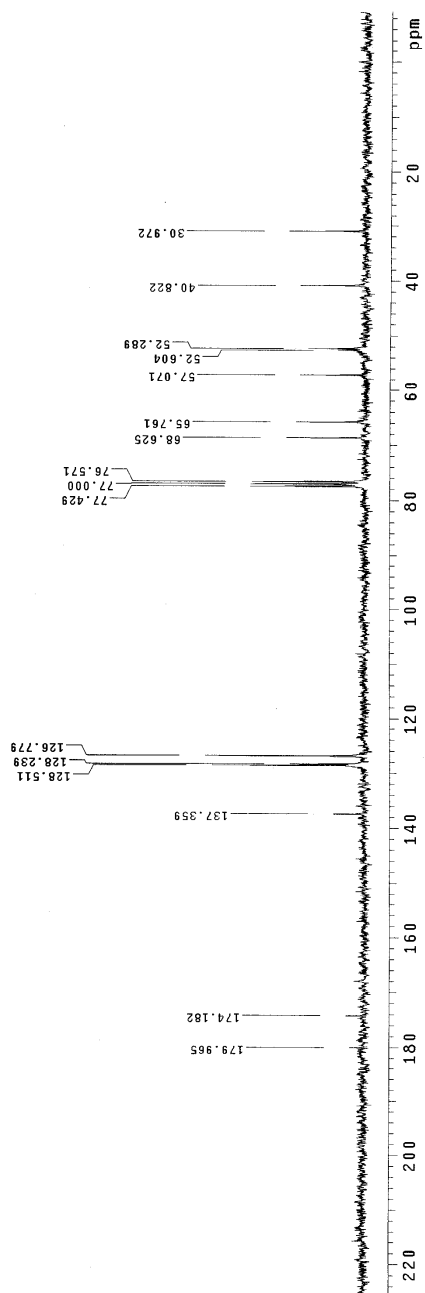

101r-5-117a

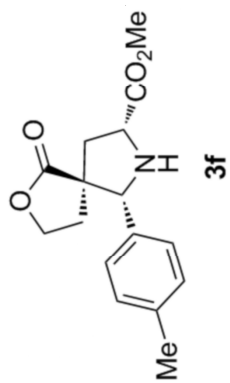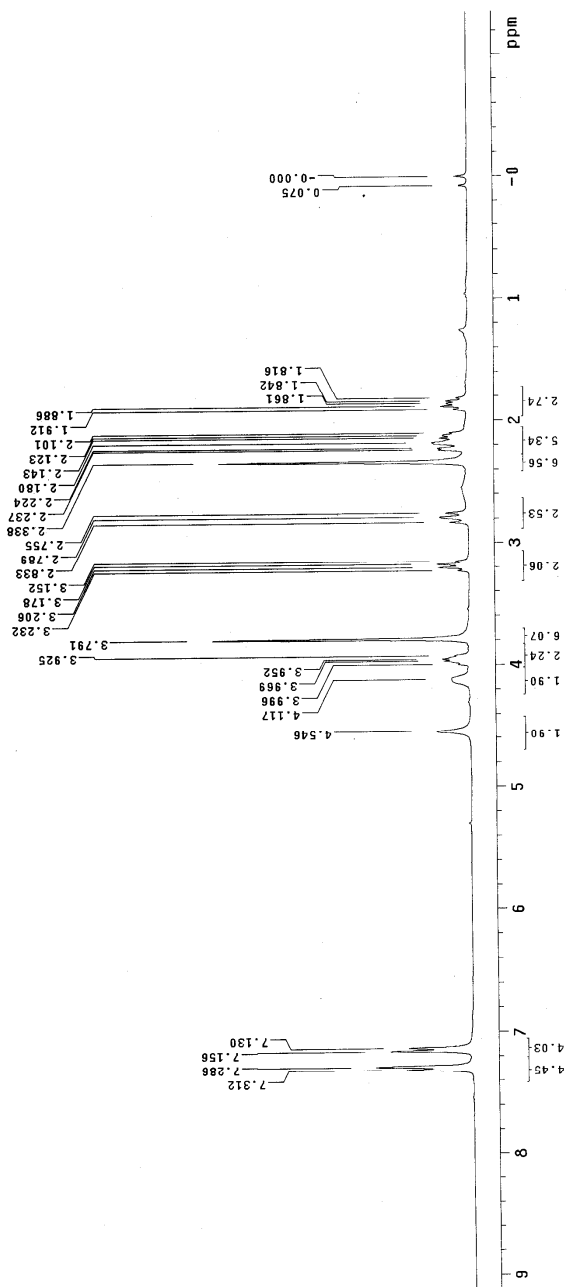

c13-1qh-5-117a

Solvent: CDCl<sub>3</sub>  
Ambient temperature  
Mercury-300BB "mercury300"

Relax delay 1.000 sec  
Acq time 0.500 sec  
Width 17699.1 Hz  
64 repetitions  
Pulse program zgpg30  
DECOUPLE CH1, 300.0815462 MHz  
Power 40 dB  
continuously on  
WALTZ16 modulated  
NUC1 13C, 101.626125 MHz  
Line broadening 4.0 Hz  
FT size 32768  
Total time 4 hr, 35 min, 1 sec

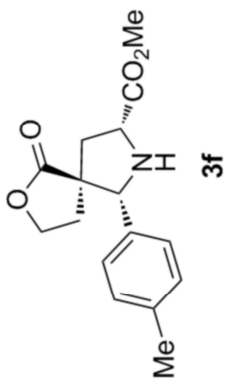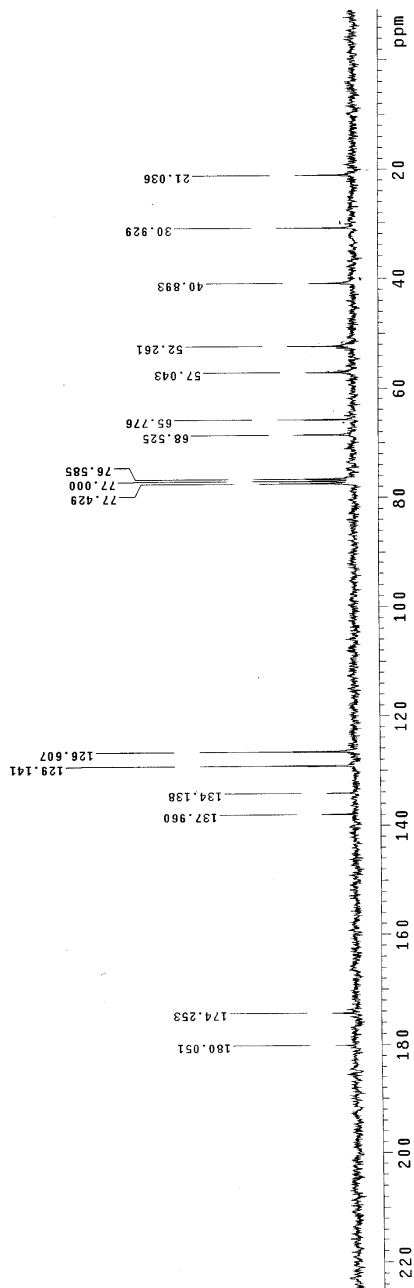

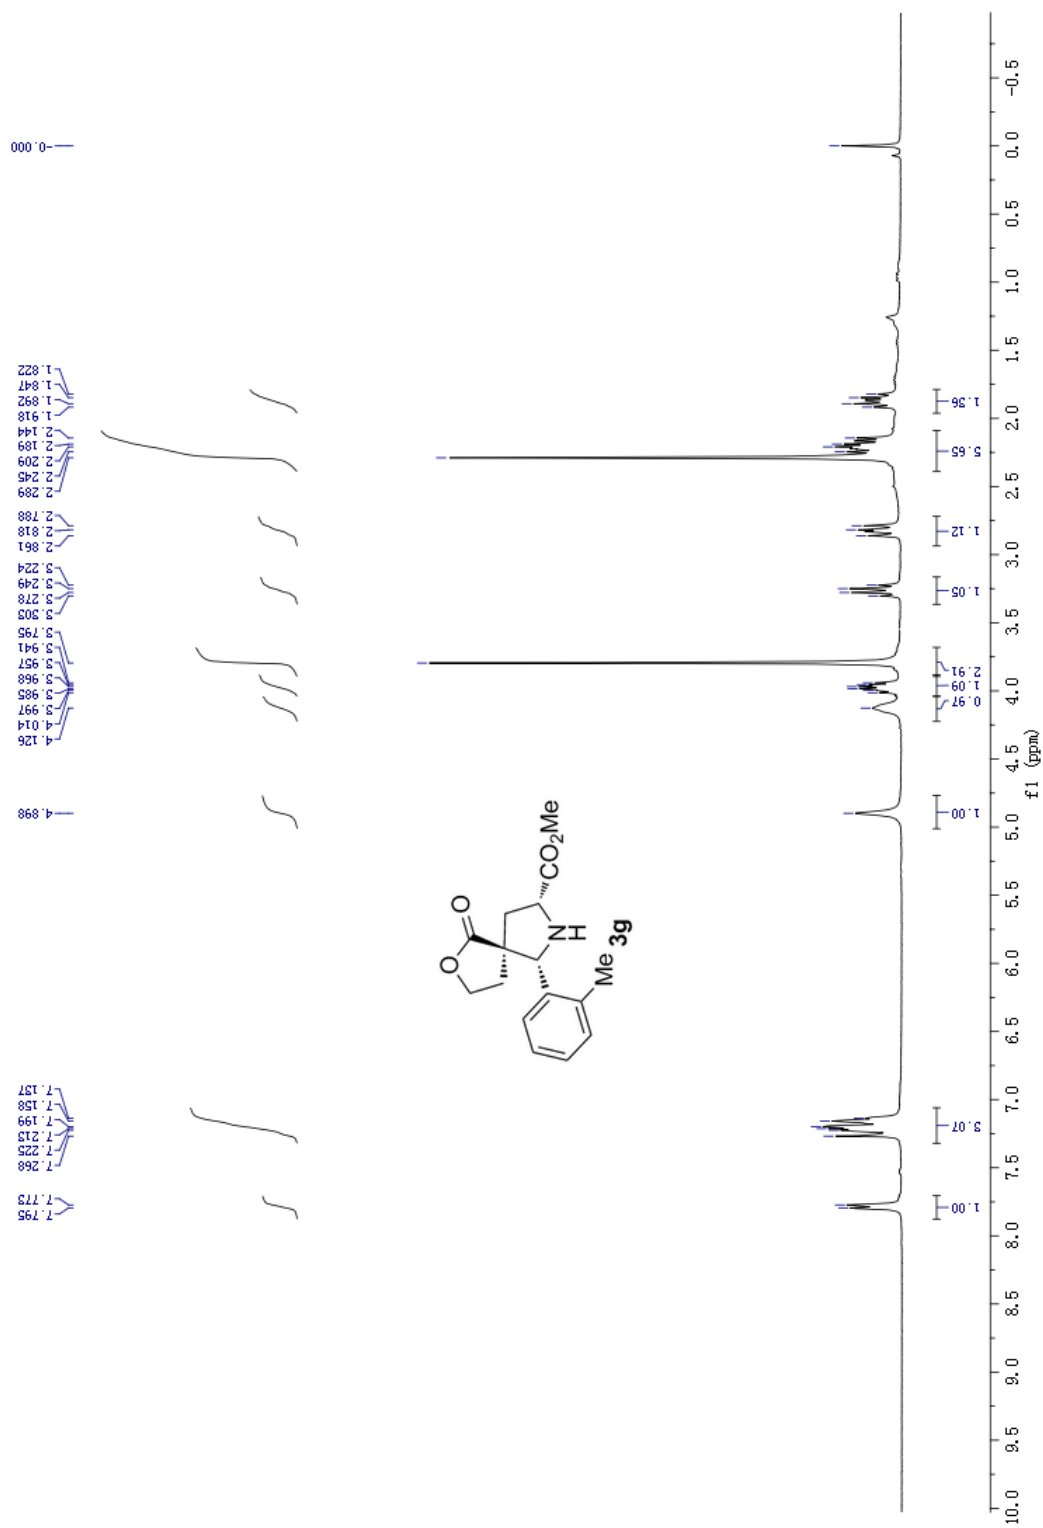

c13-1q4-5-117d

Solvent: CDCl<sub>3</sub>  
Ambient temperature  
Mercury-300BB "mercury300"

Relax. delay 1.000 sec  
Pulse 28.0 degrees  
Acq. time 0.015 sec  
Width 12689.1 Hz  
178 Repetitions  
OBSERVE C13, 75.4552913 MHz  
DECOUPLE H1, 300.0813462 MHz  
continuously on  
WALTZ-16 modulated  
DATA PROCESSING  
Spectral width 4.0 Hz  
FI 5128.32768  
Total time 4 hr., 35 min., 1 sec

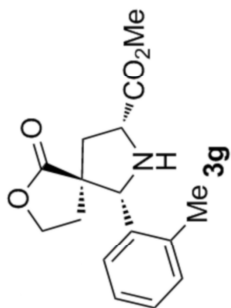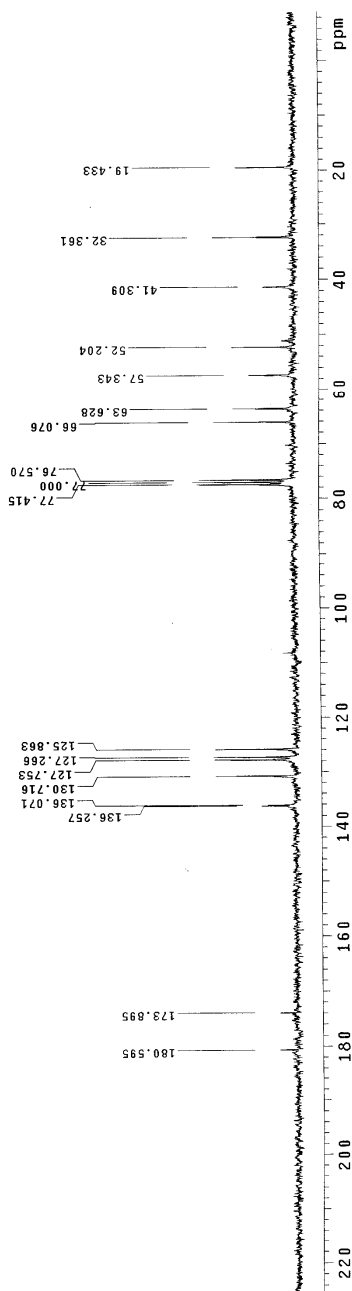

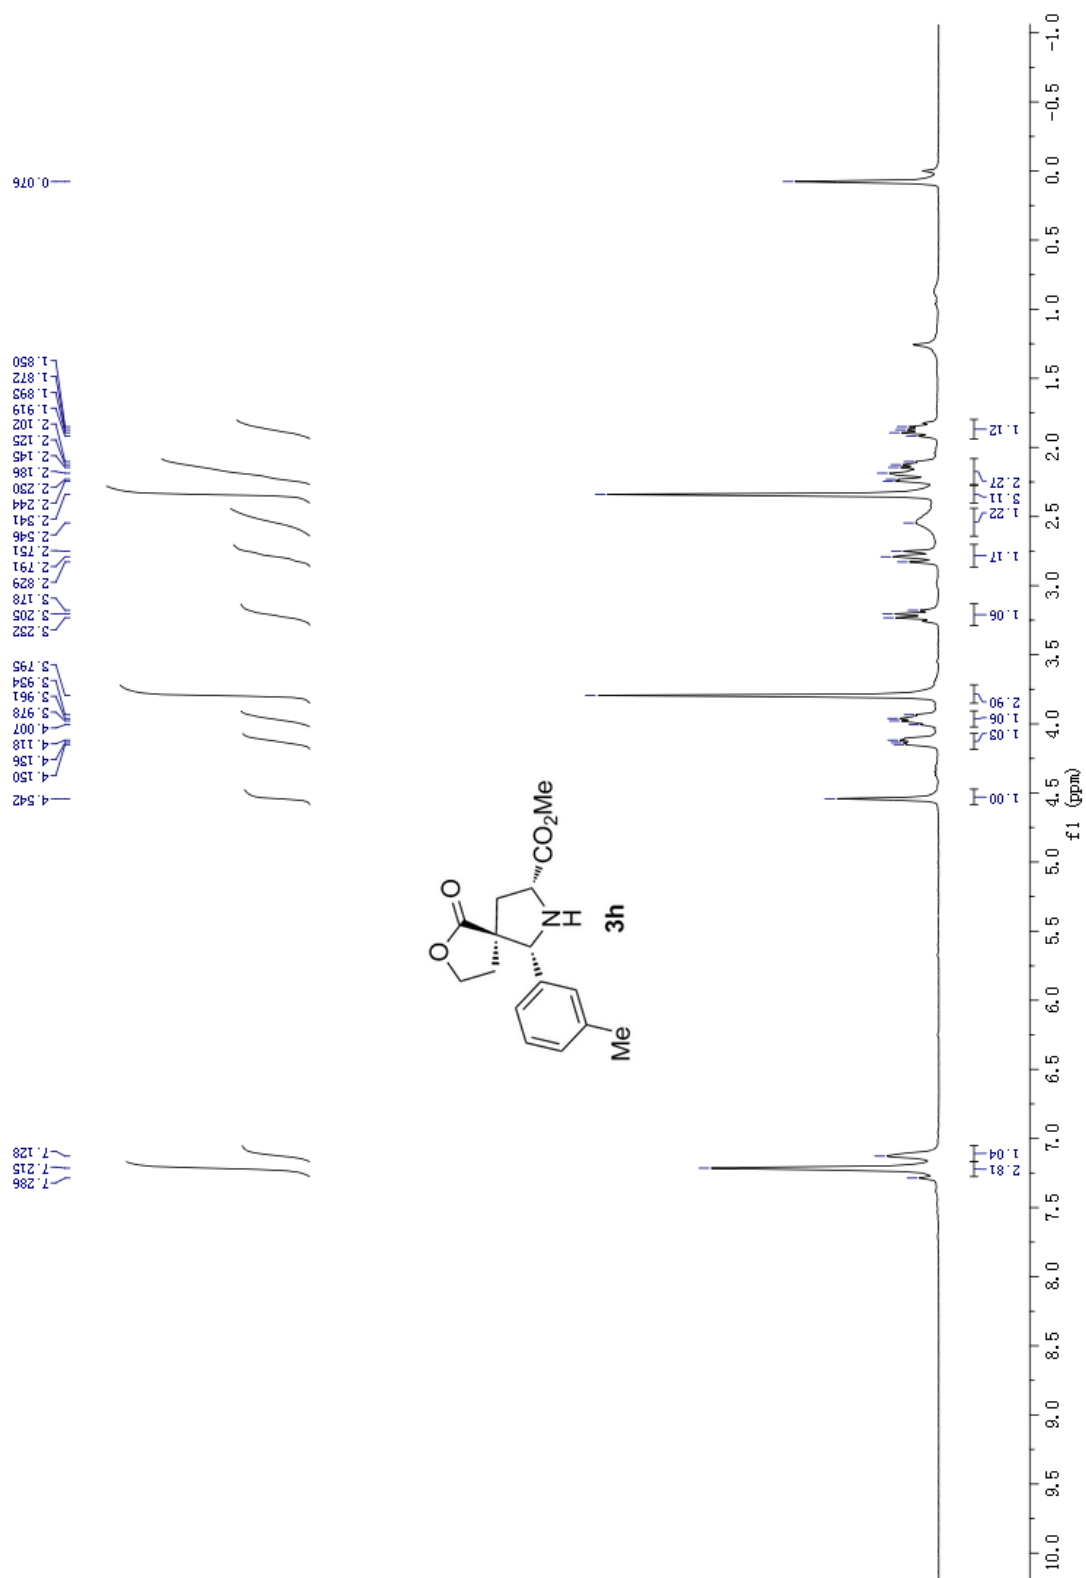

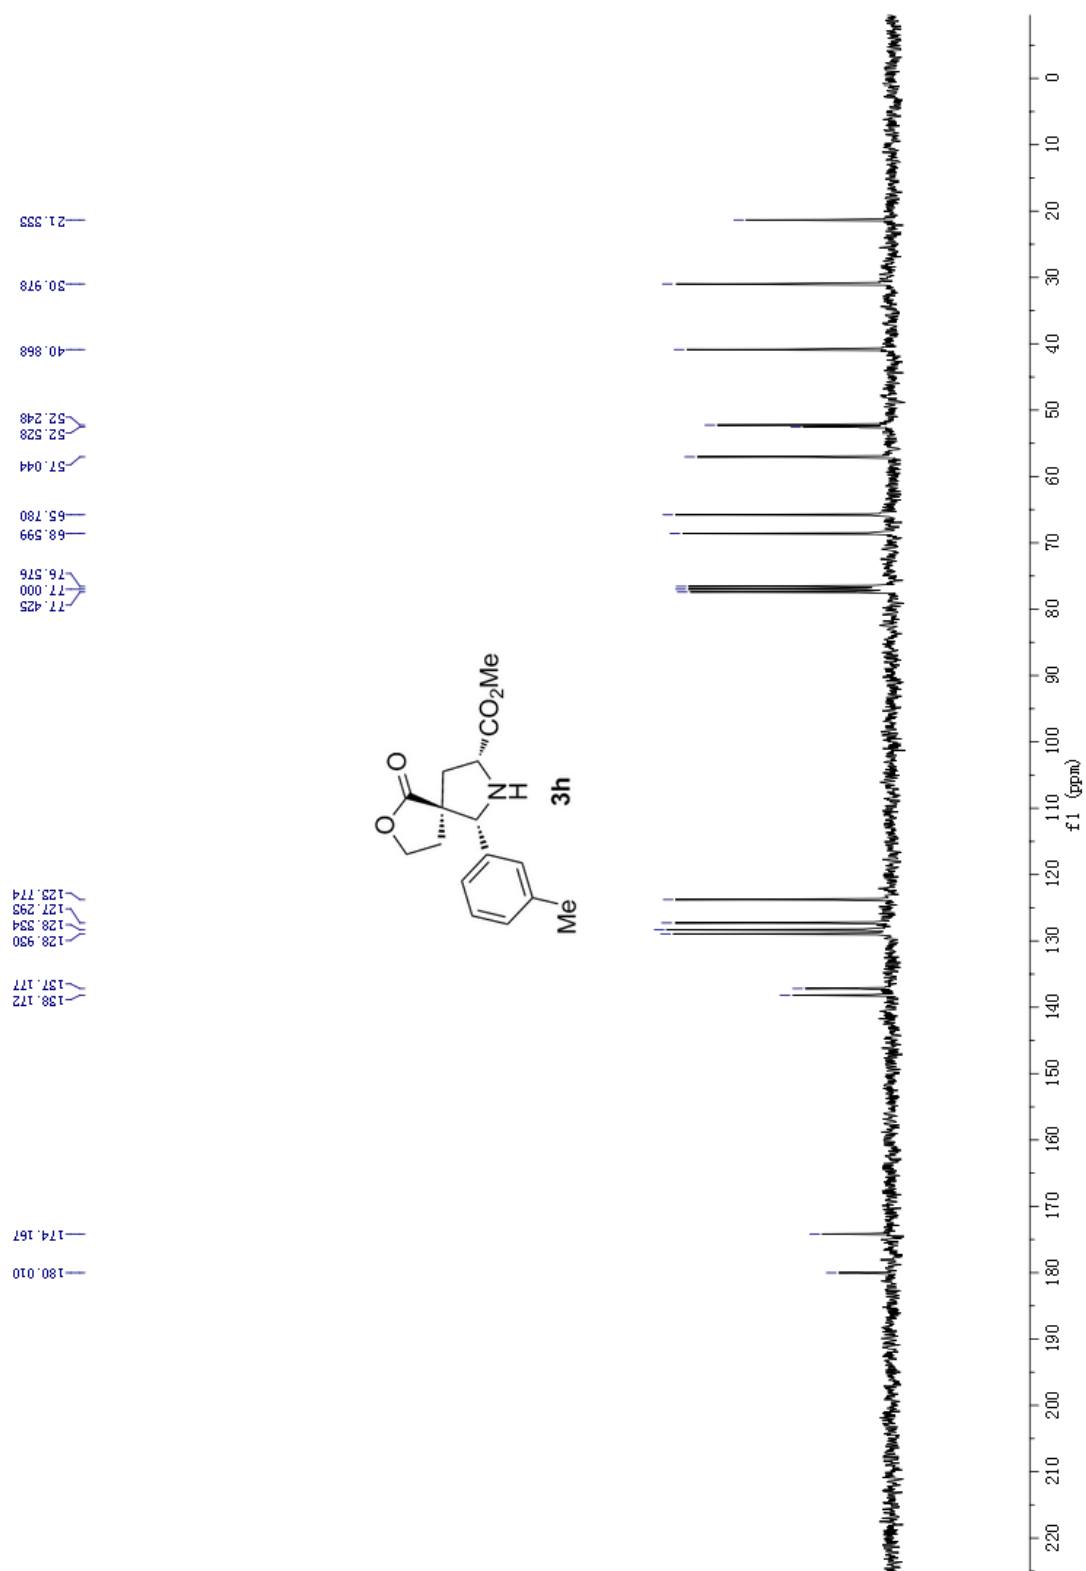

1q1-5-117b

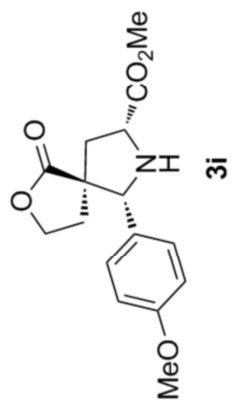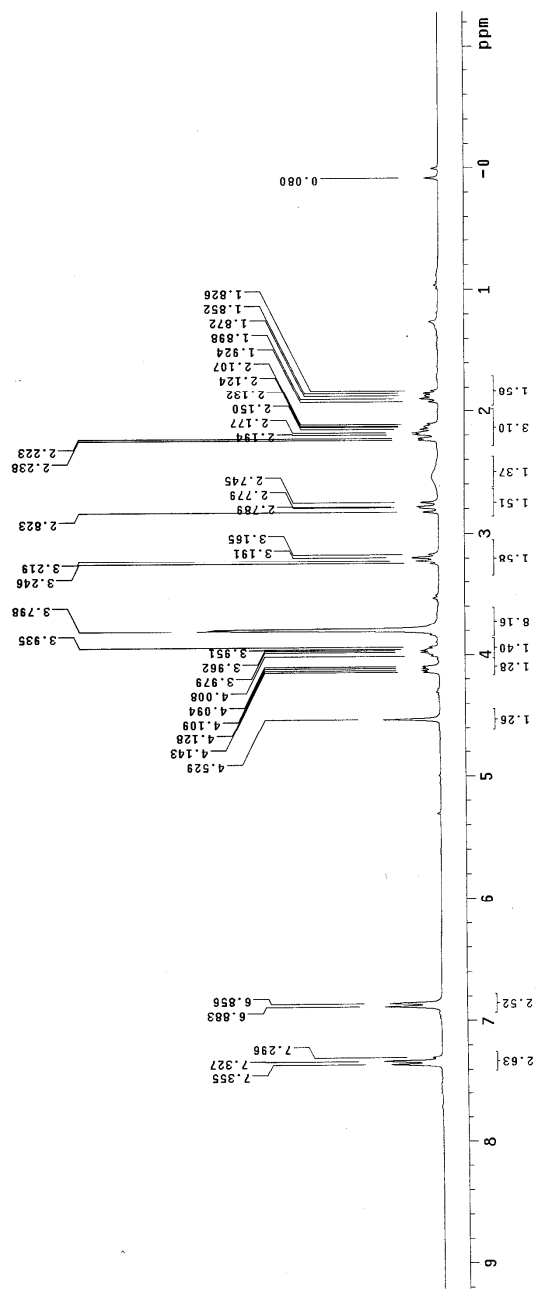



c13-1eh-5-117b

Solvent: CDCl<sub>3</sub>  
Ambient temperature  
Mercury-300BB "mercury300"

Relax. delay 1.000 sec  
Pulse 28.0 degrees  
Acq. time 0.333 sec  
Width 17699.1 Hz  
128 repetitions  
OBSERVE C13, 75.4555191 MHz  
Pulse 6.0 dB  
Power 60 dB  
continuously on  
WALTZ-16 modulated  
DATA PROCESSING  
Sweep rate 4.0 Hz  
FI 8120 32768  
Total time 4 hr, 35 min, 1 sec

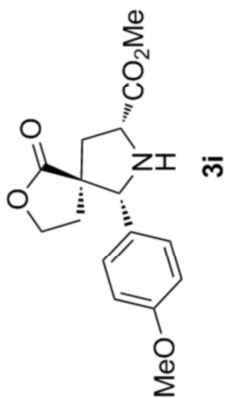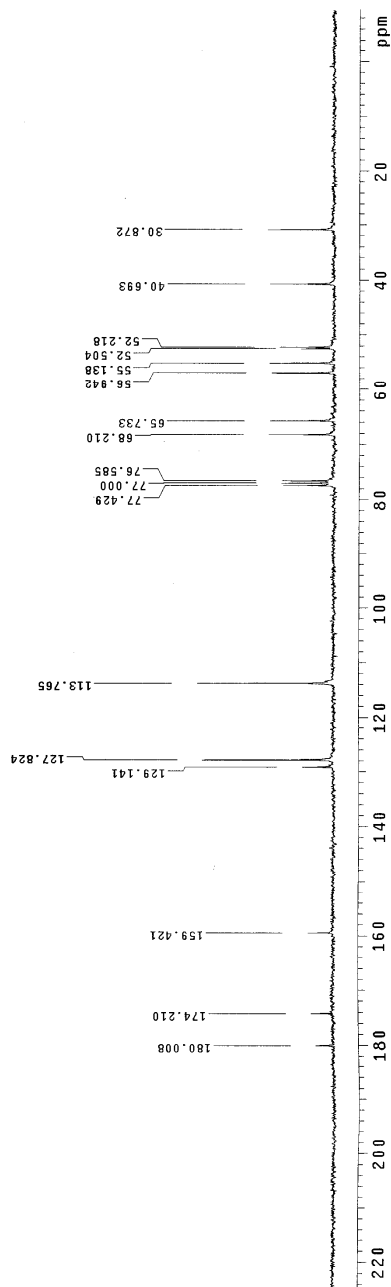

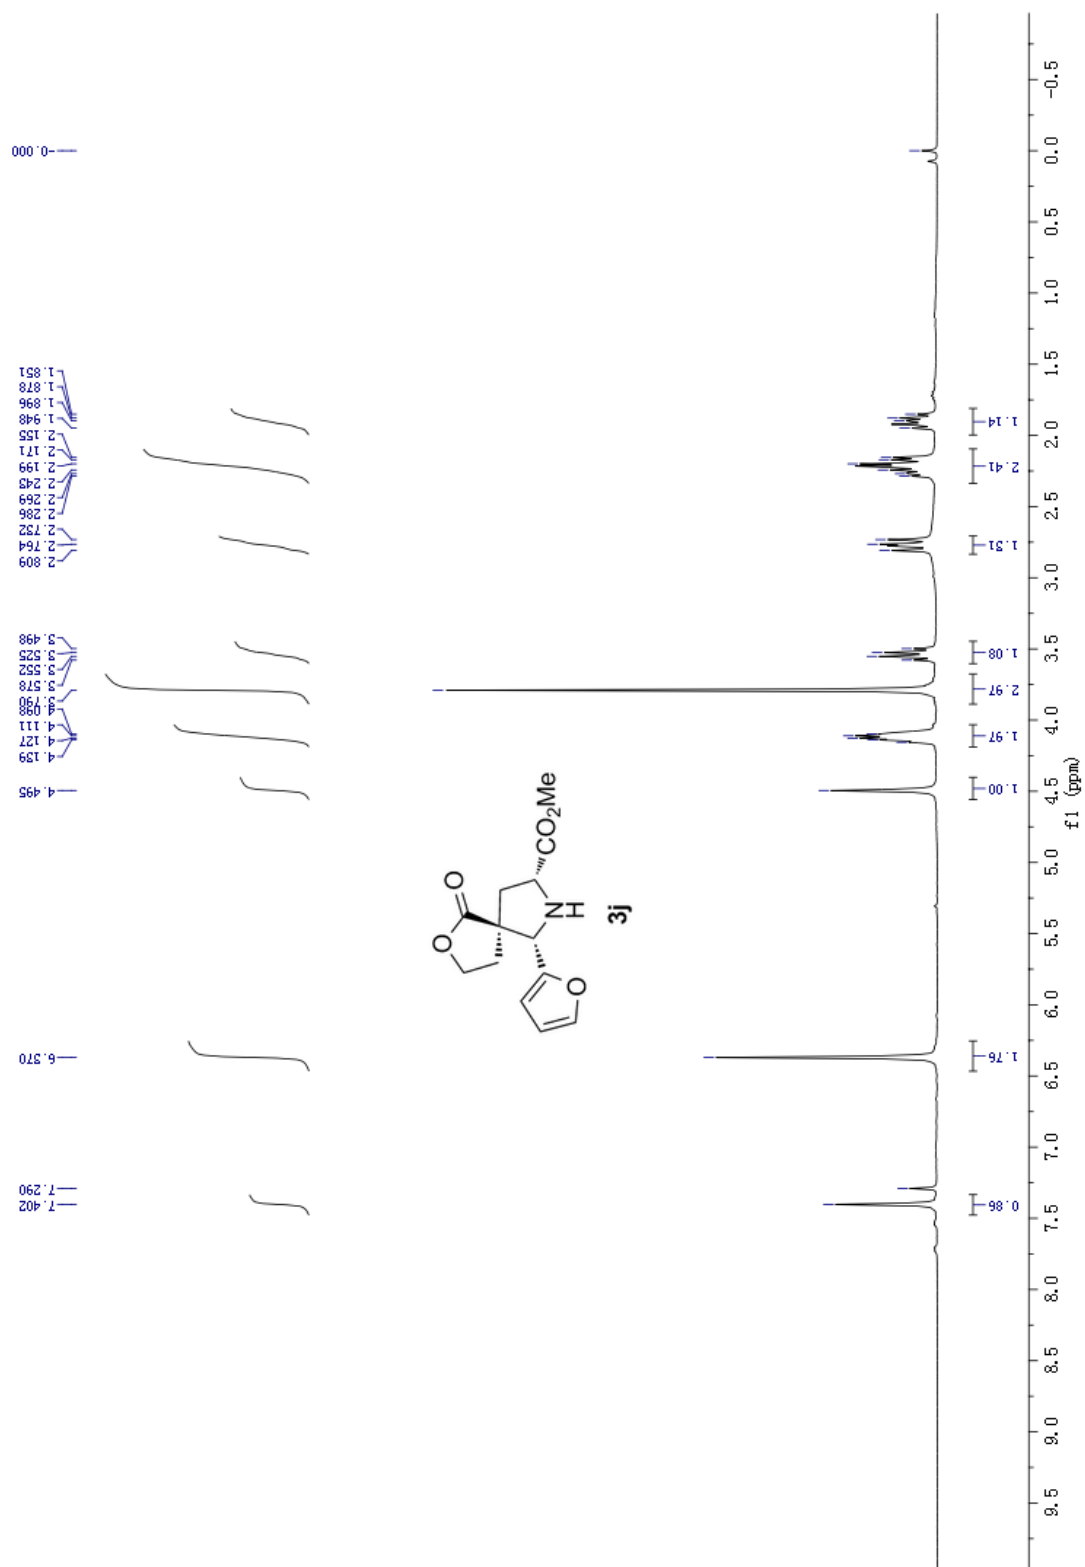

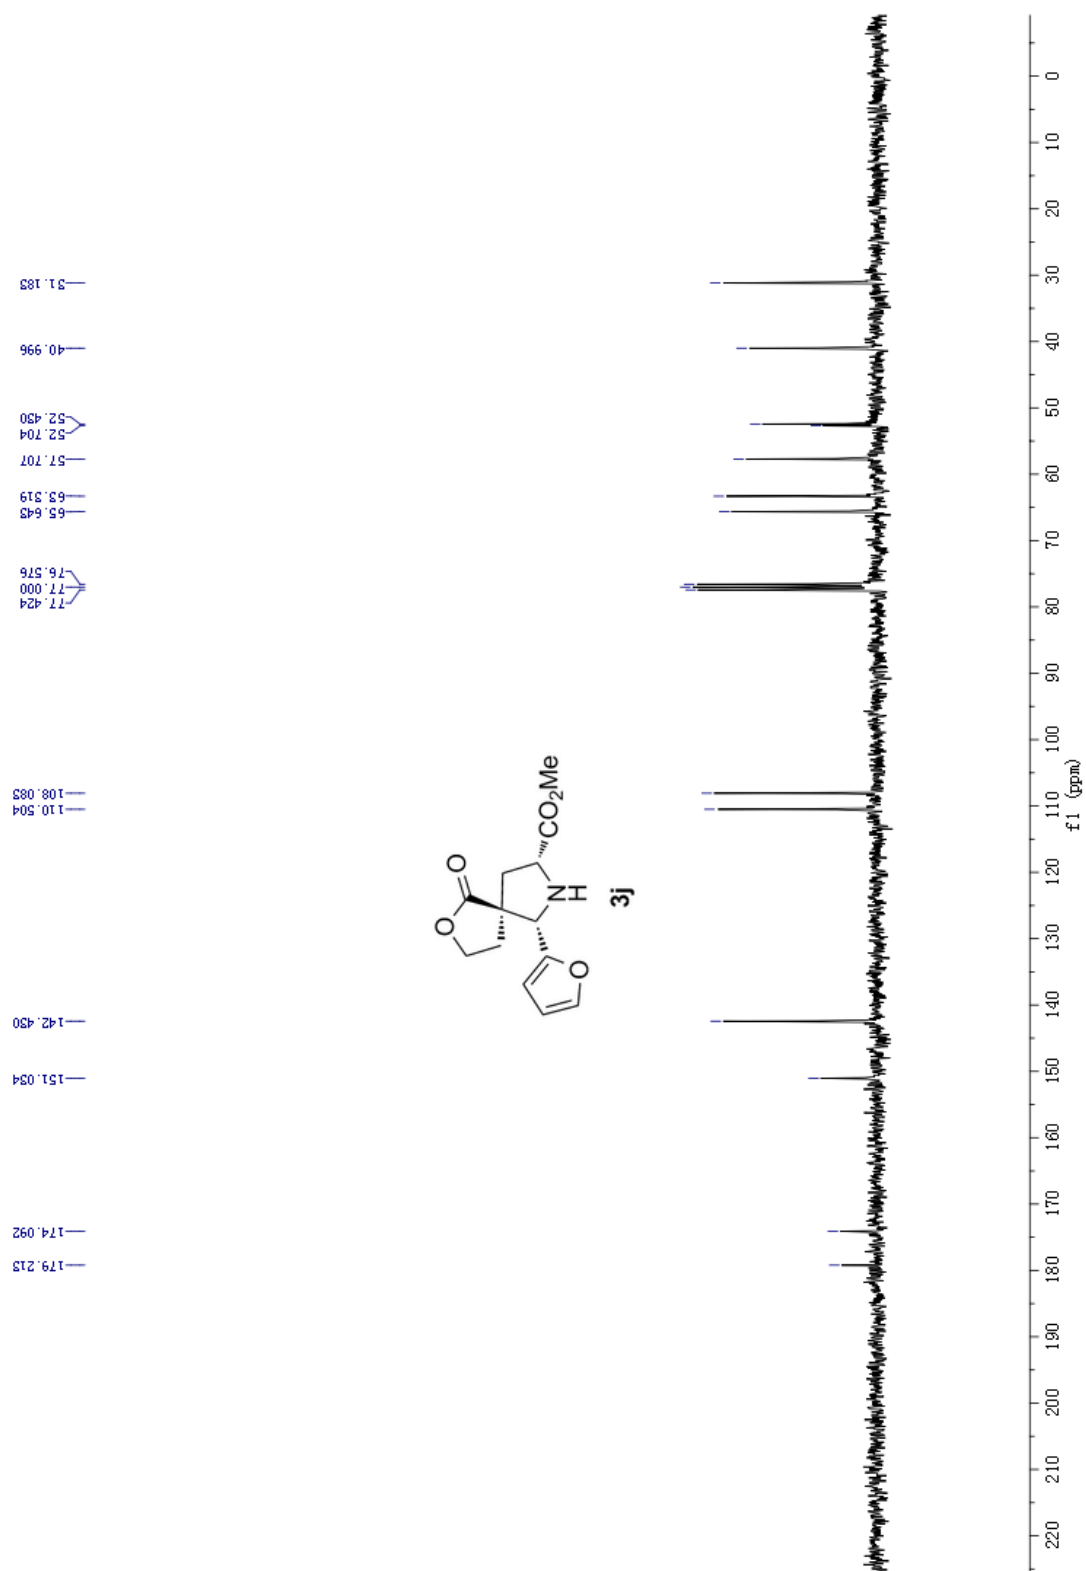

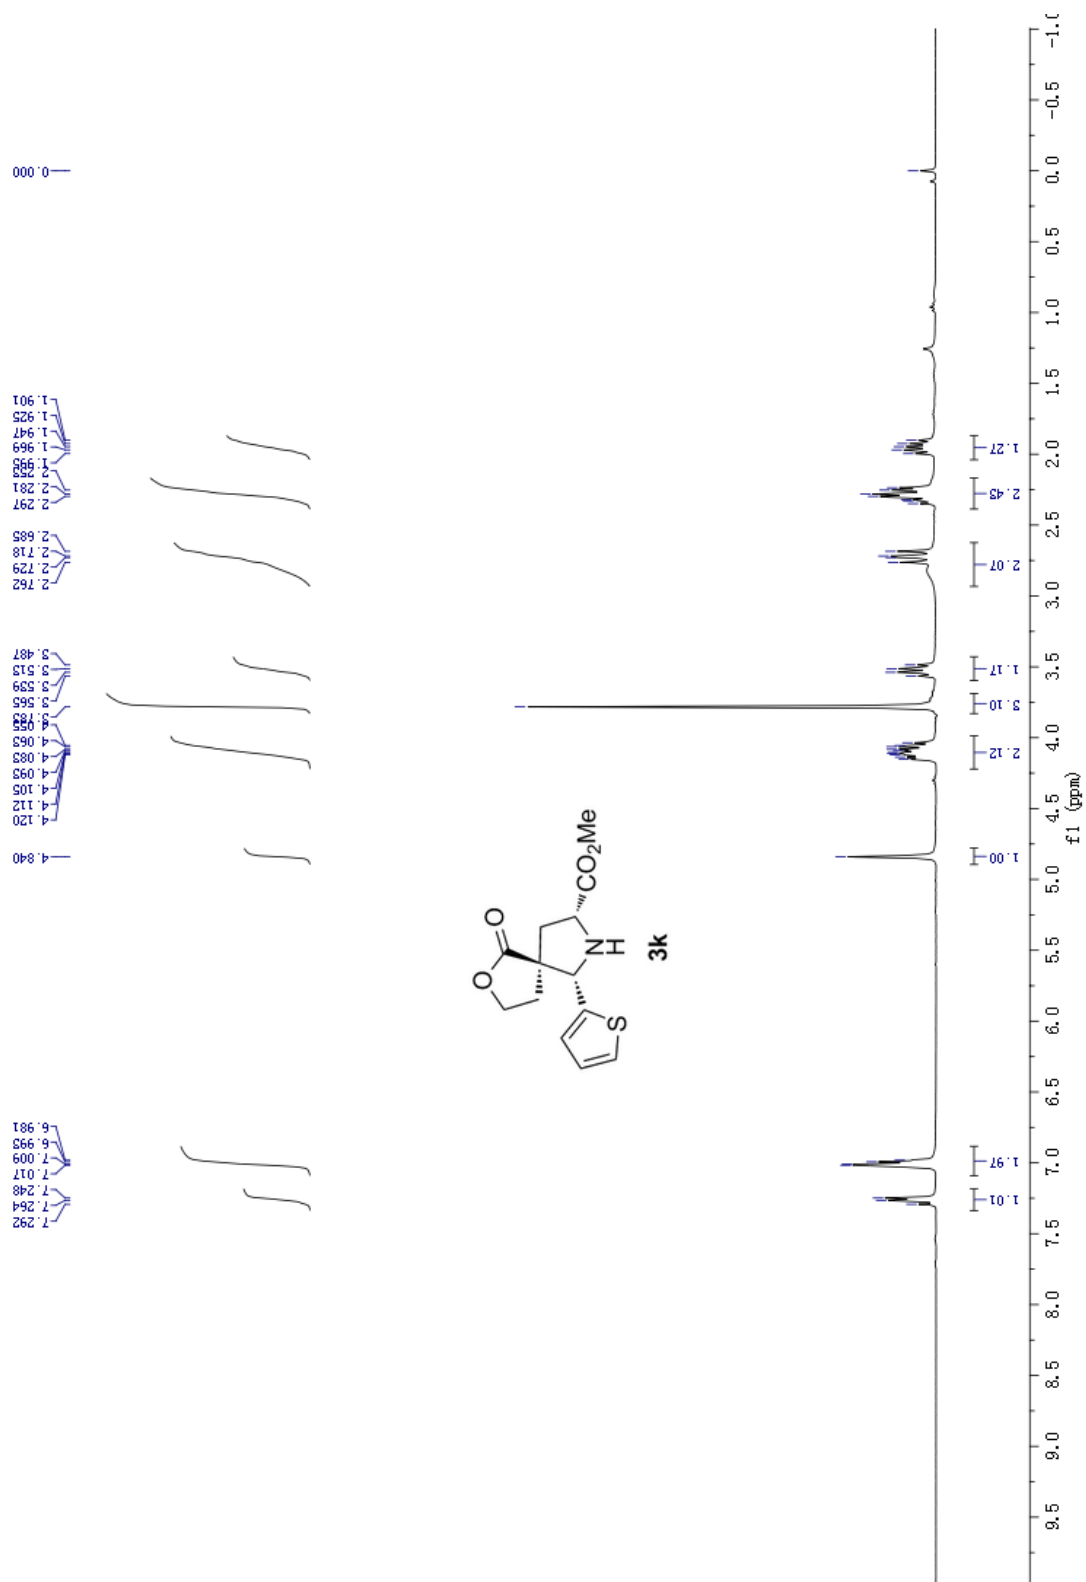

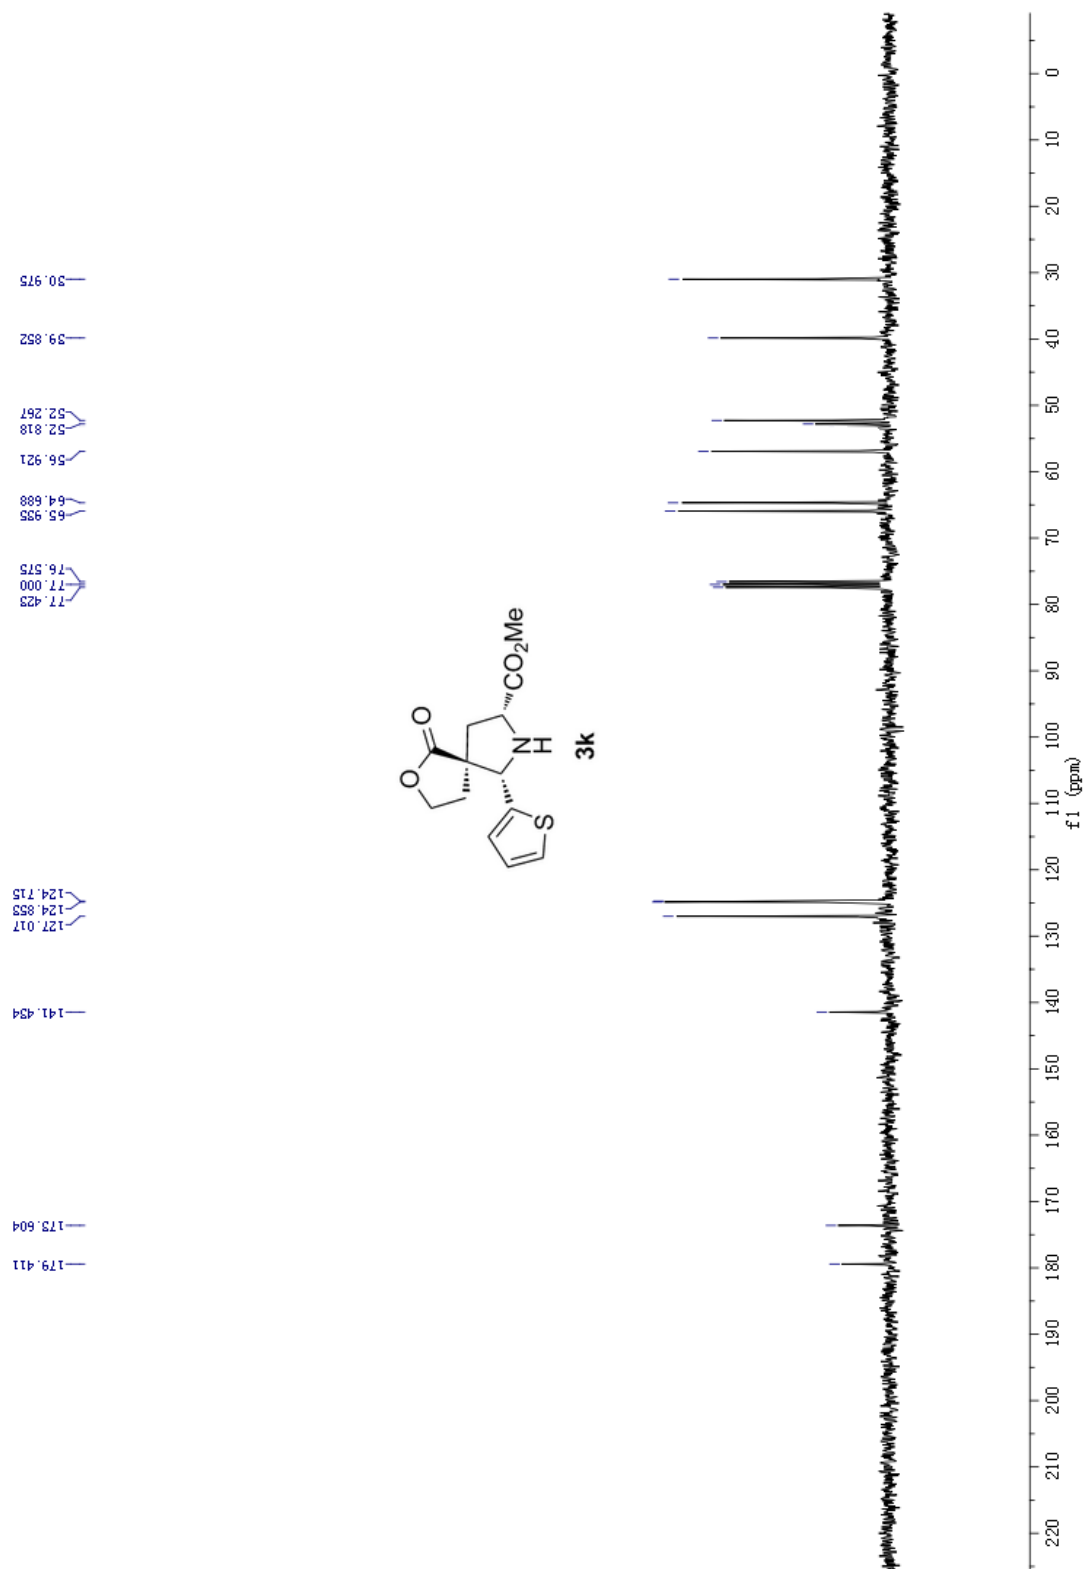

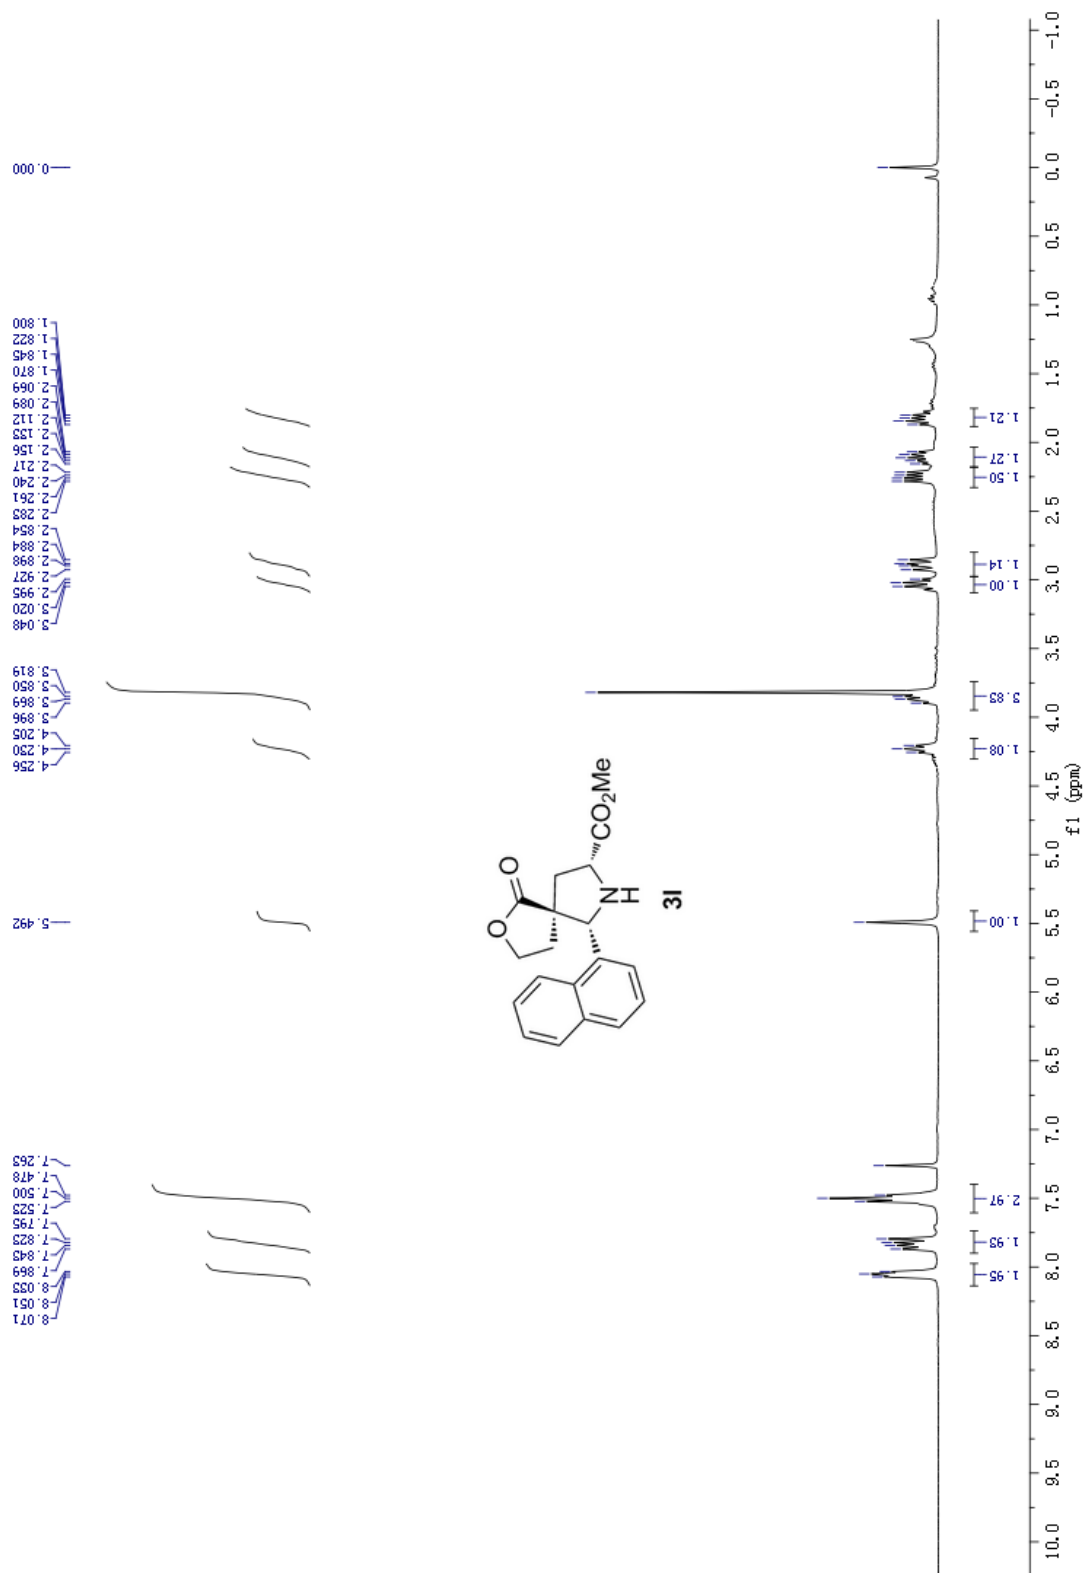

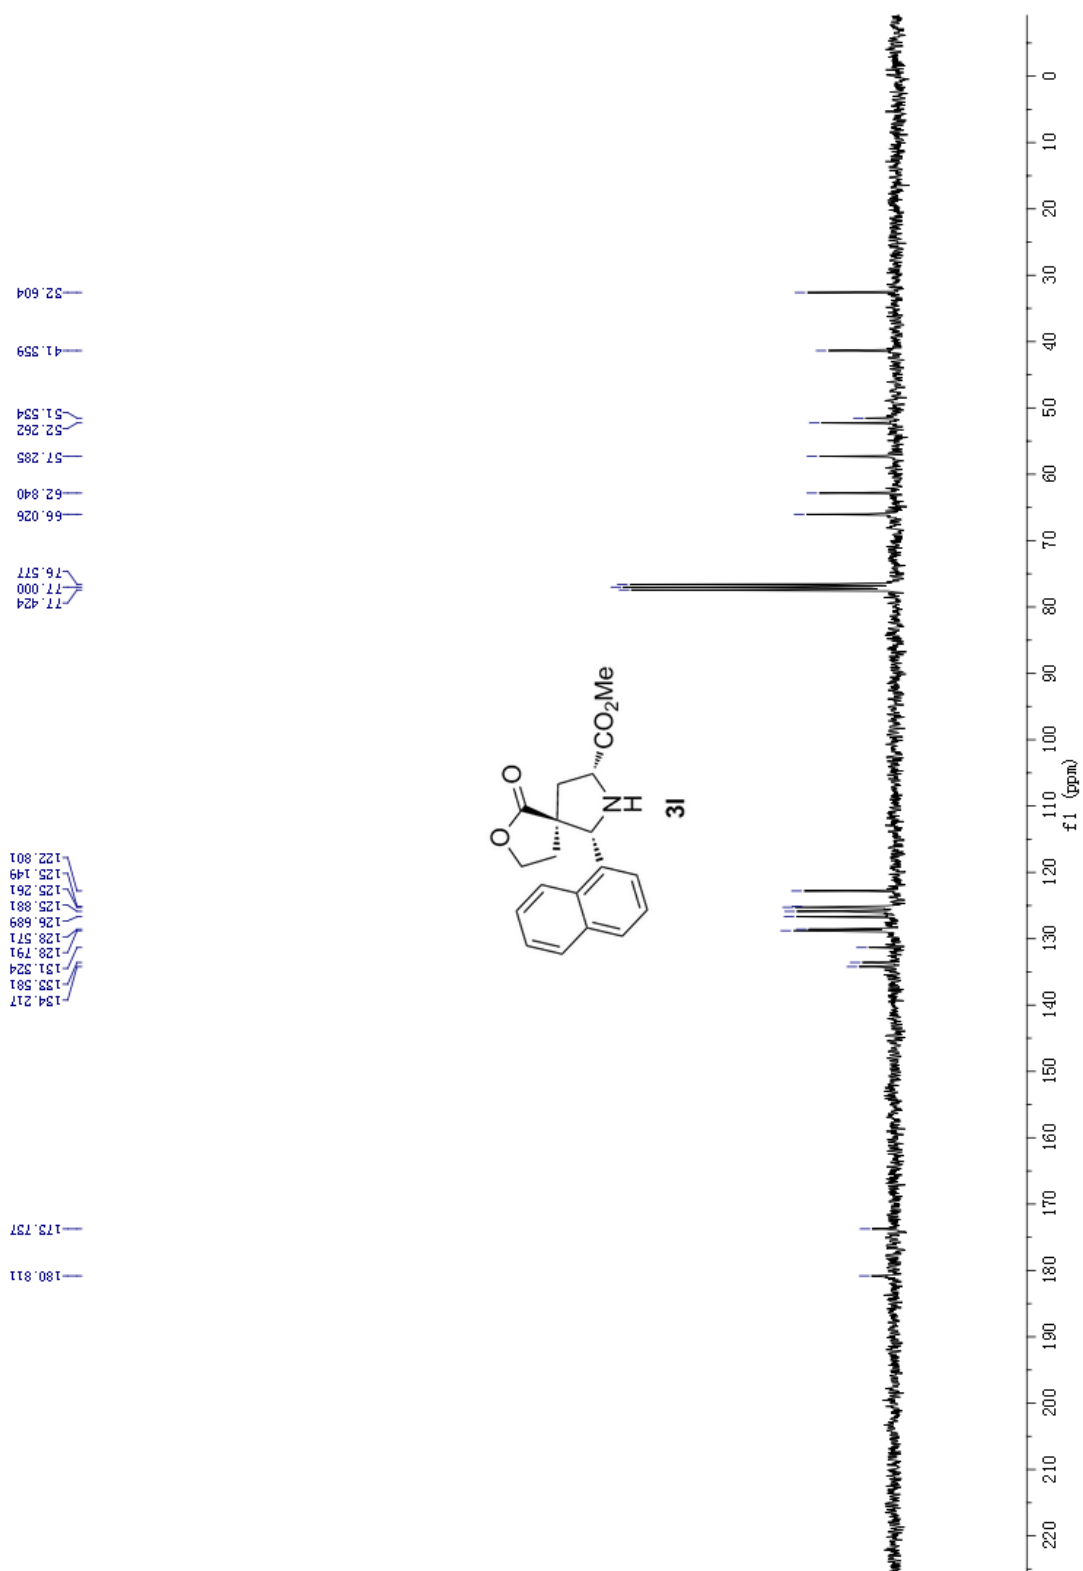

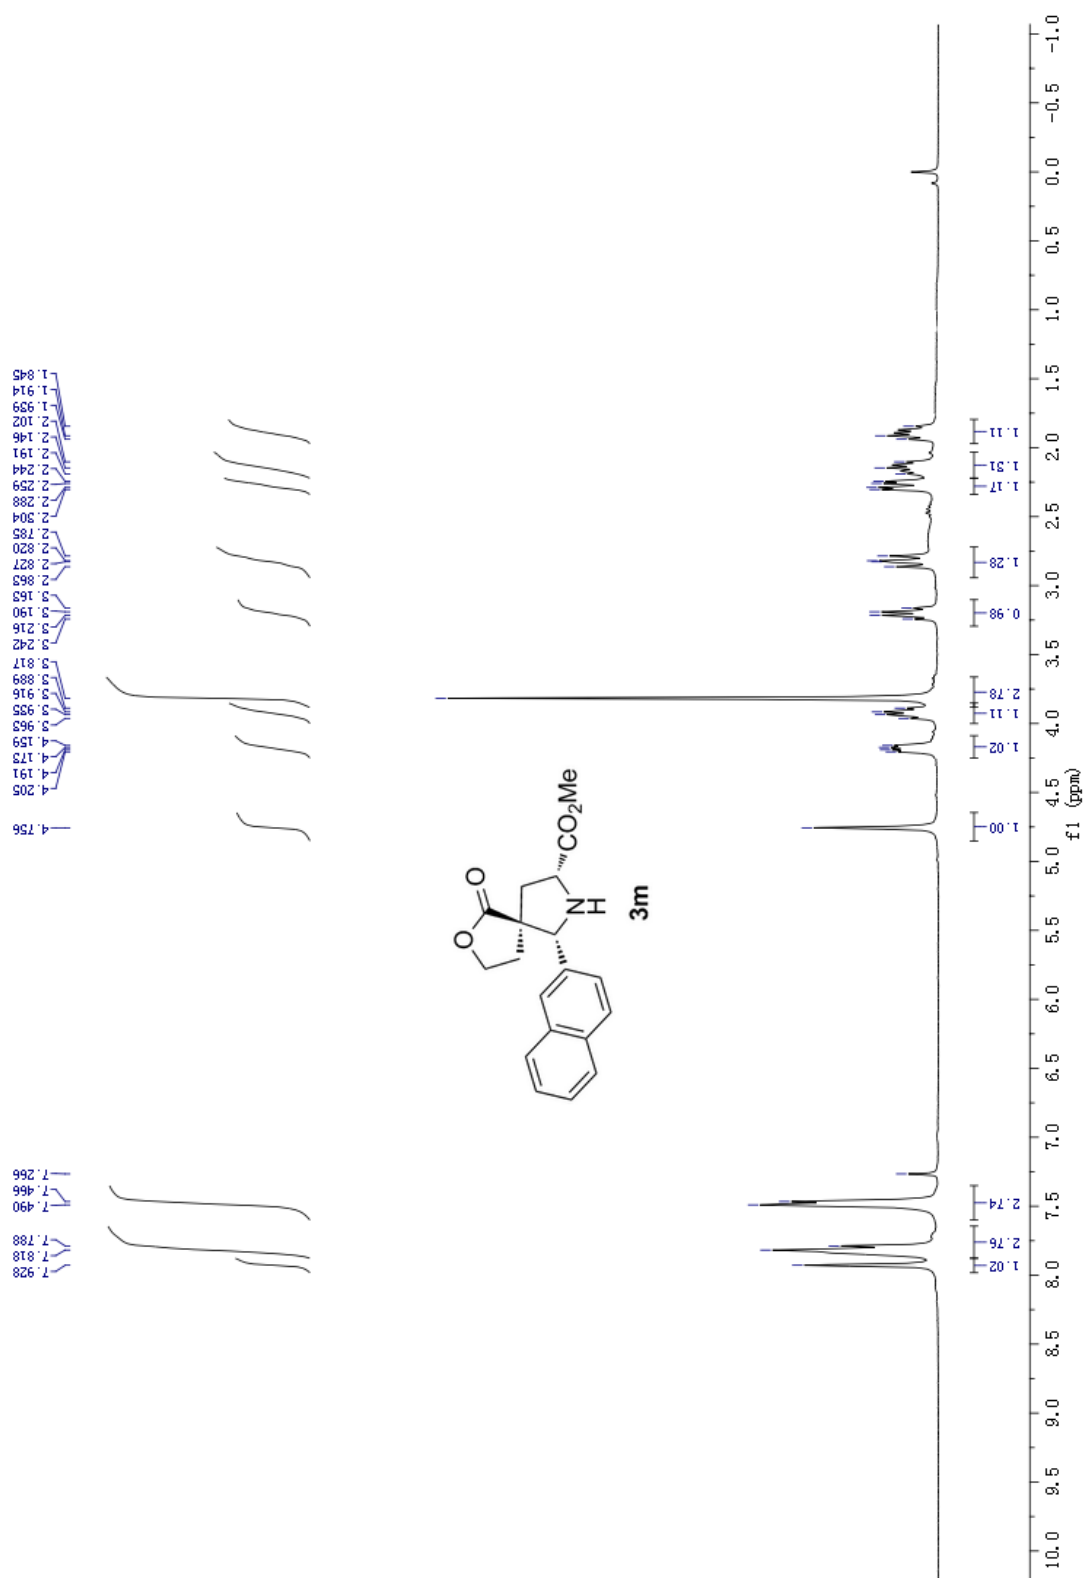



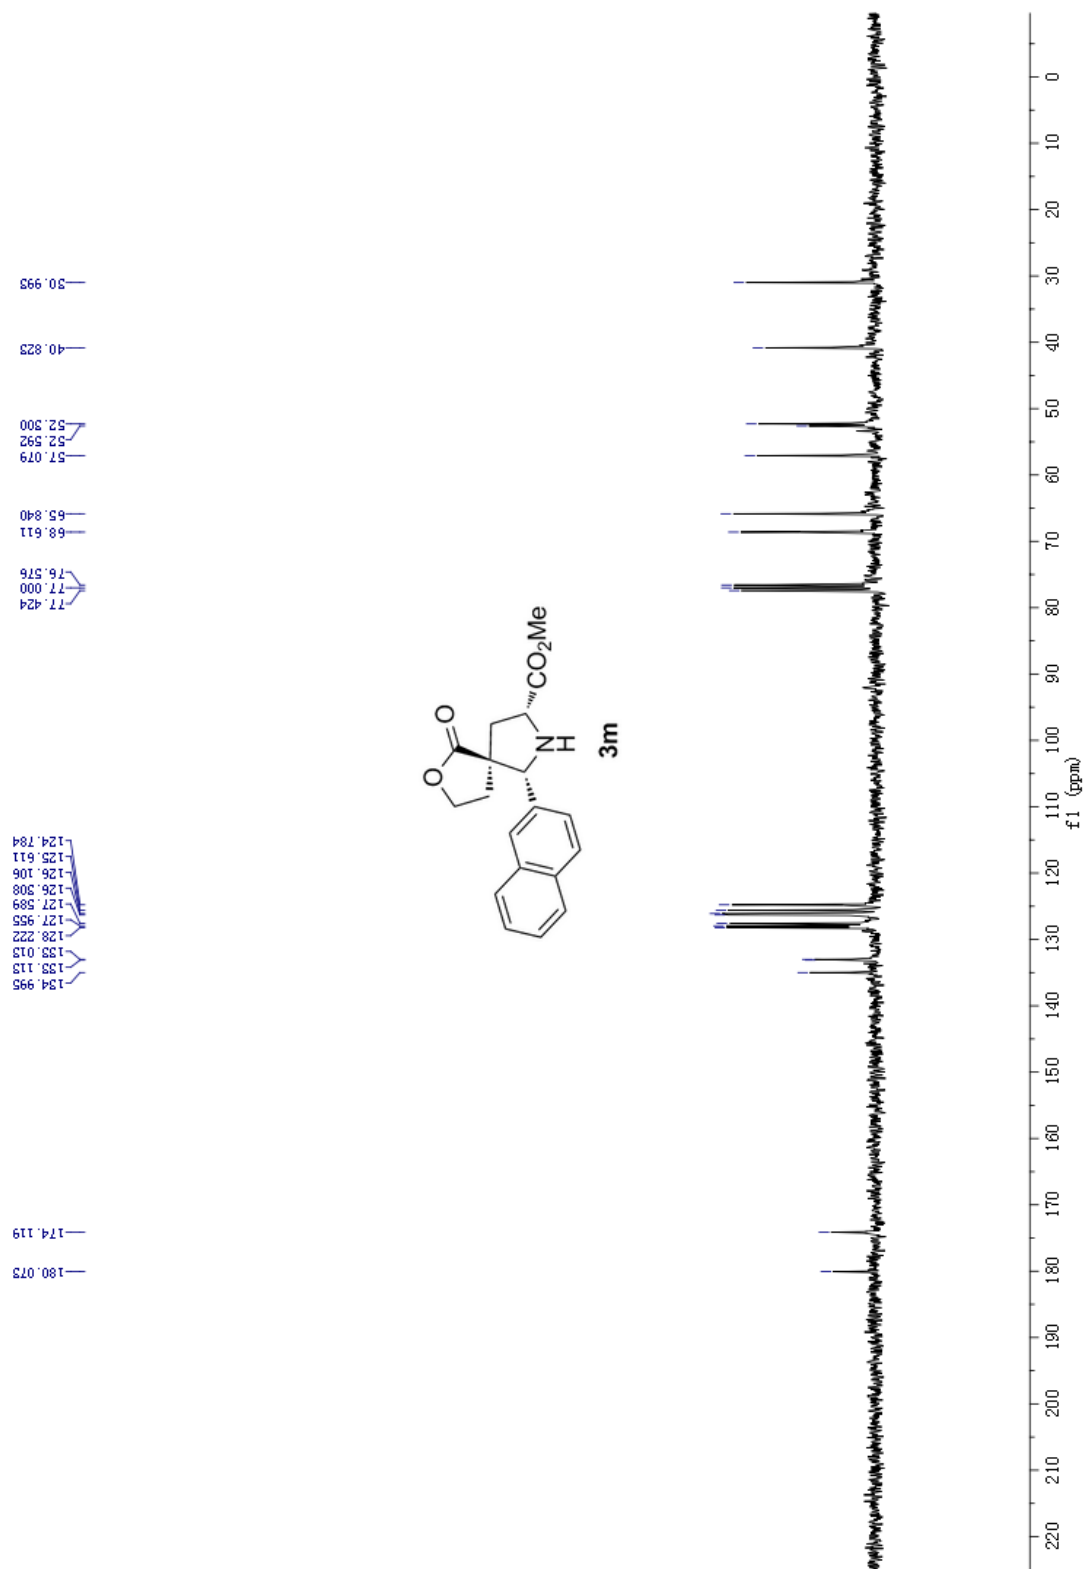

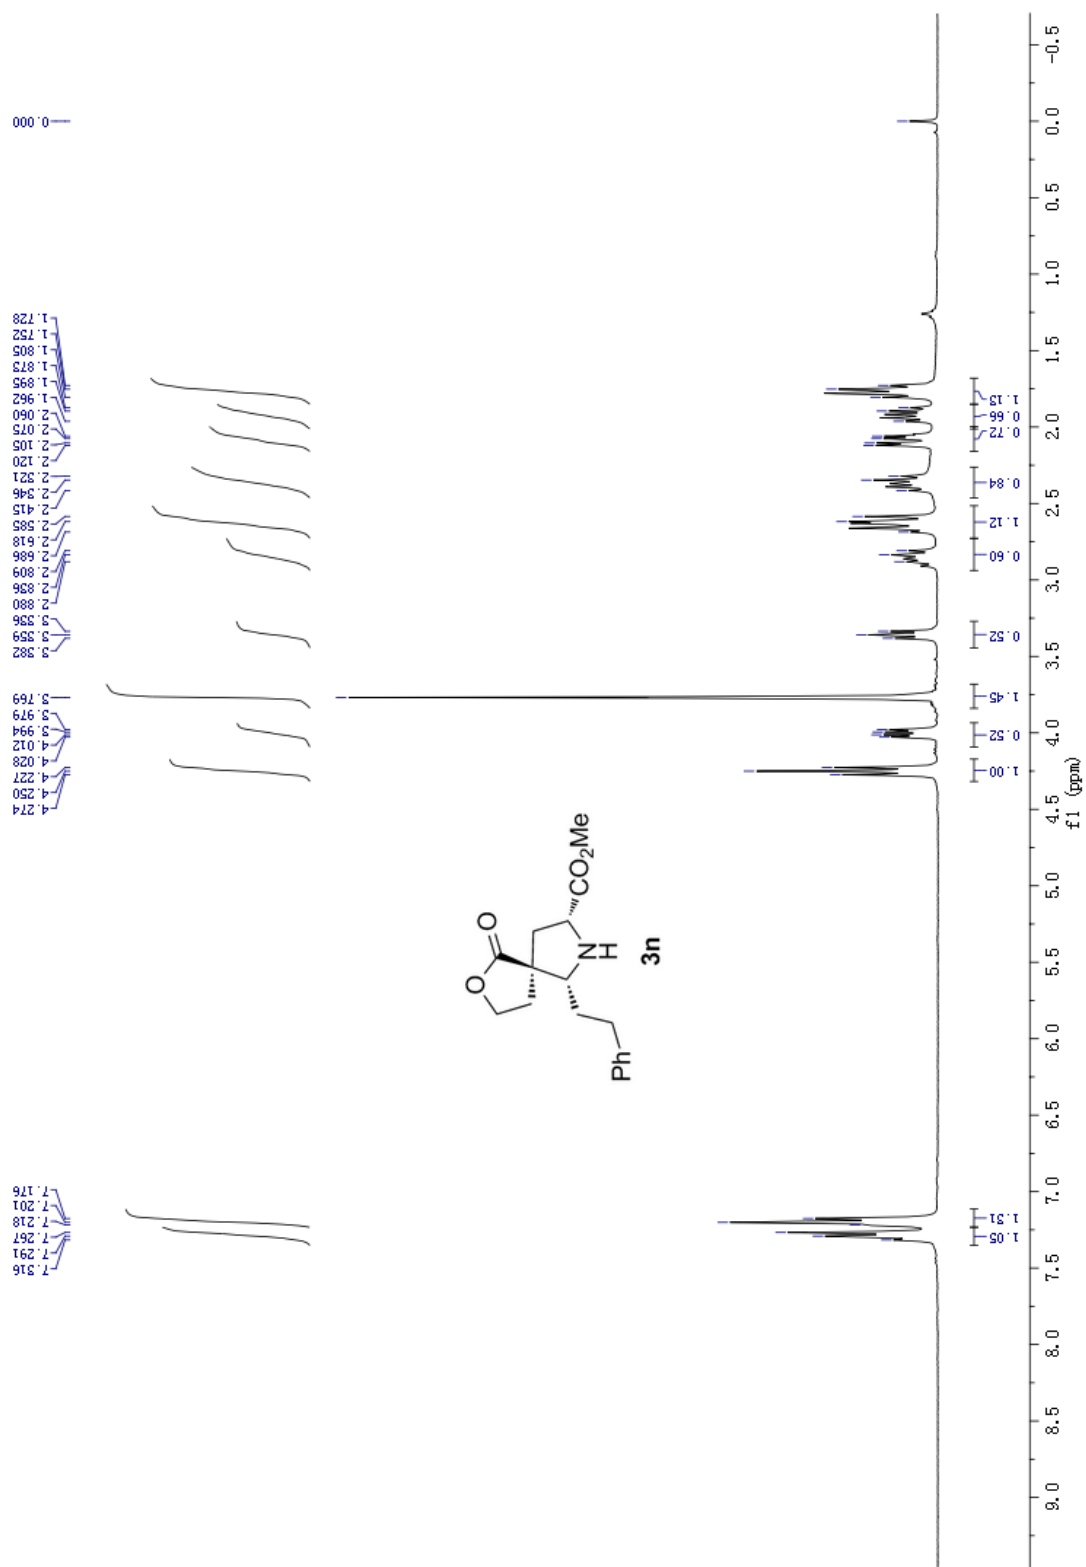

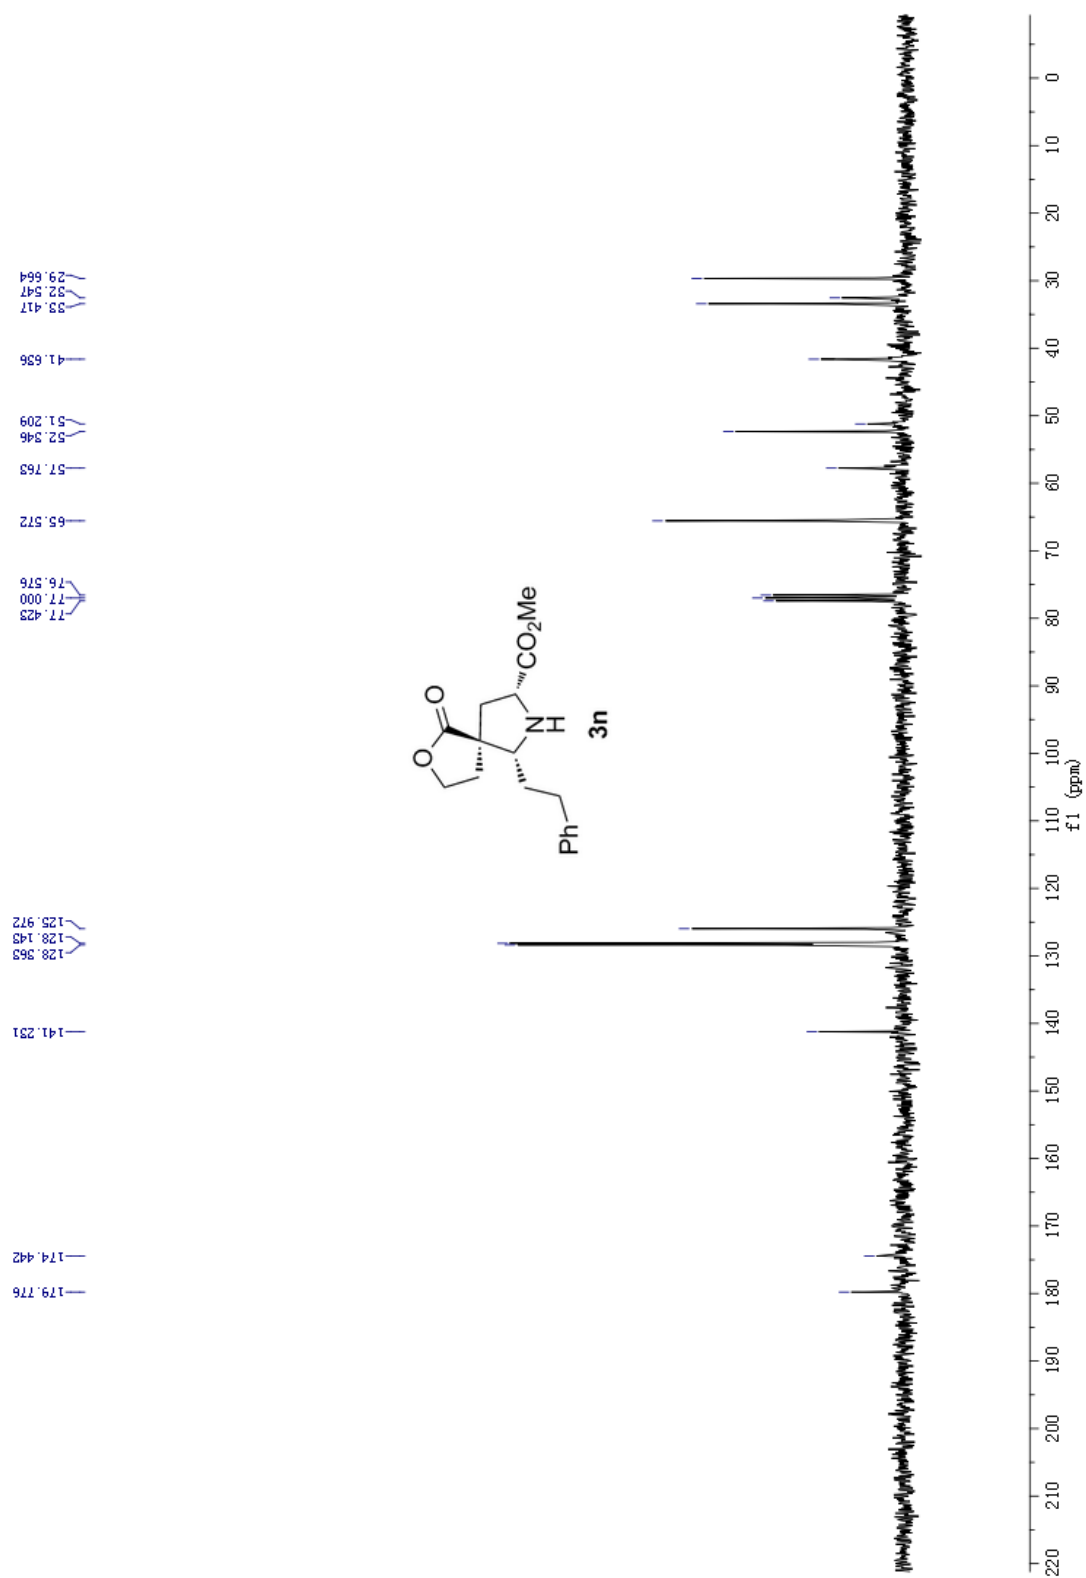

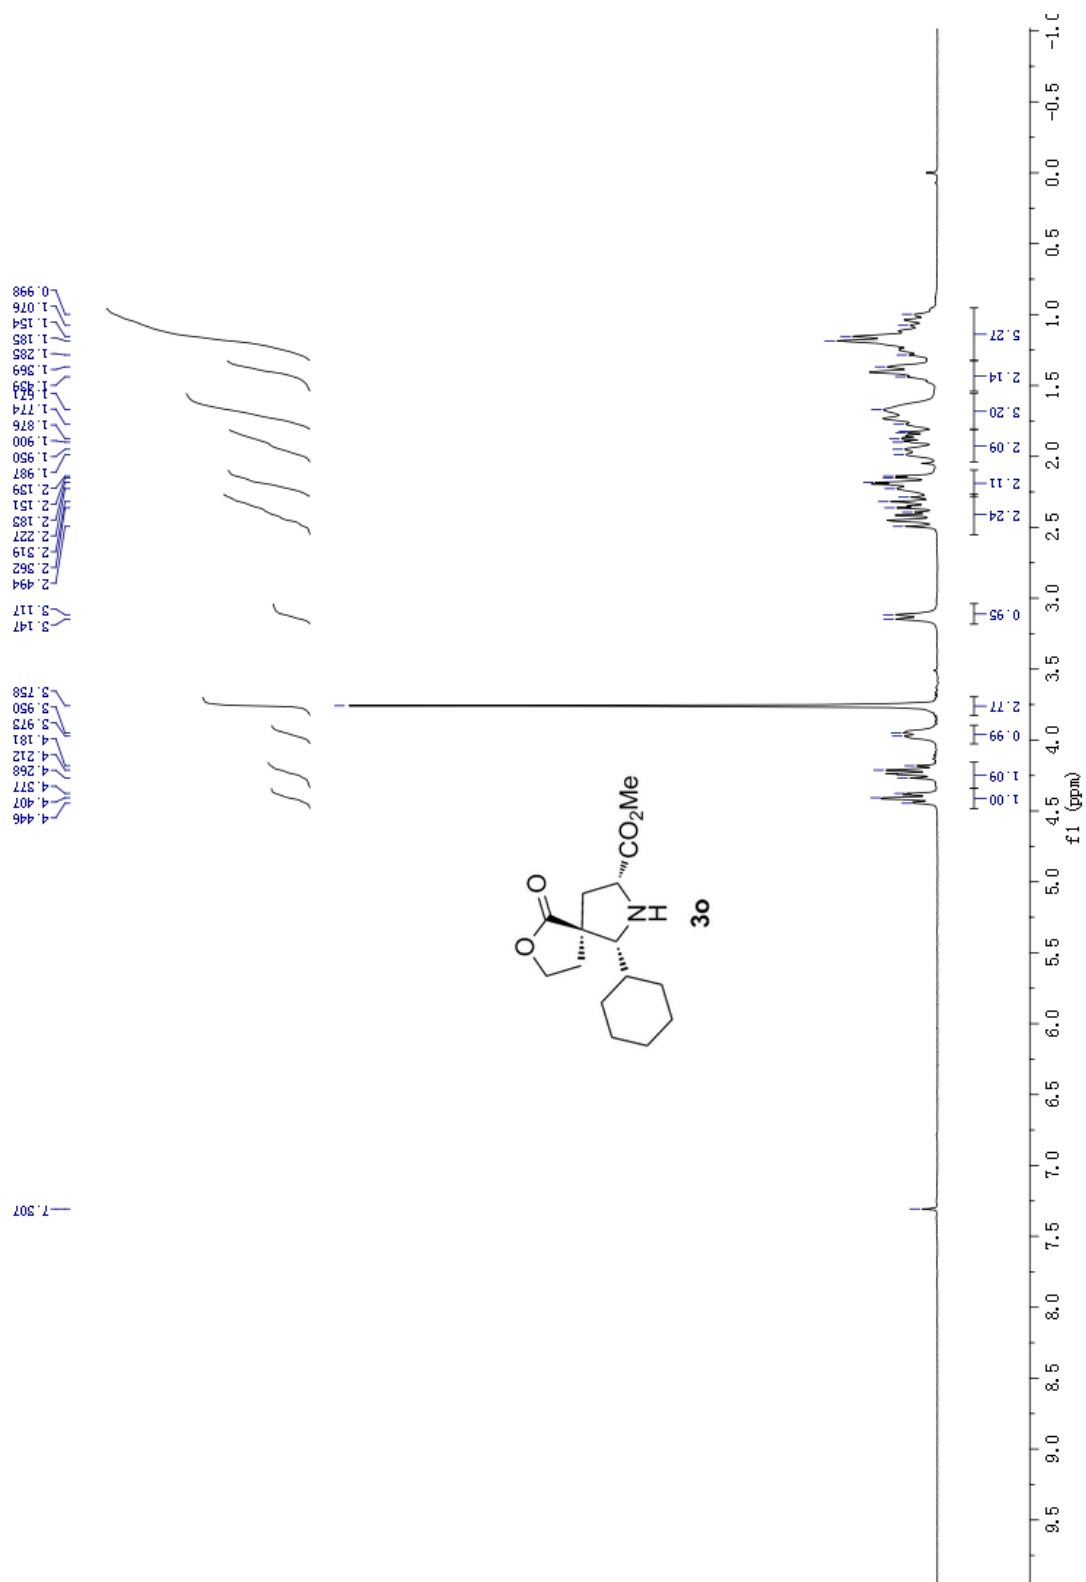

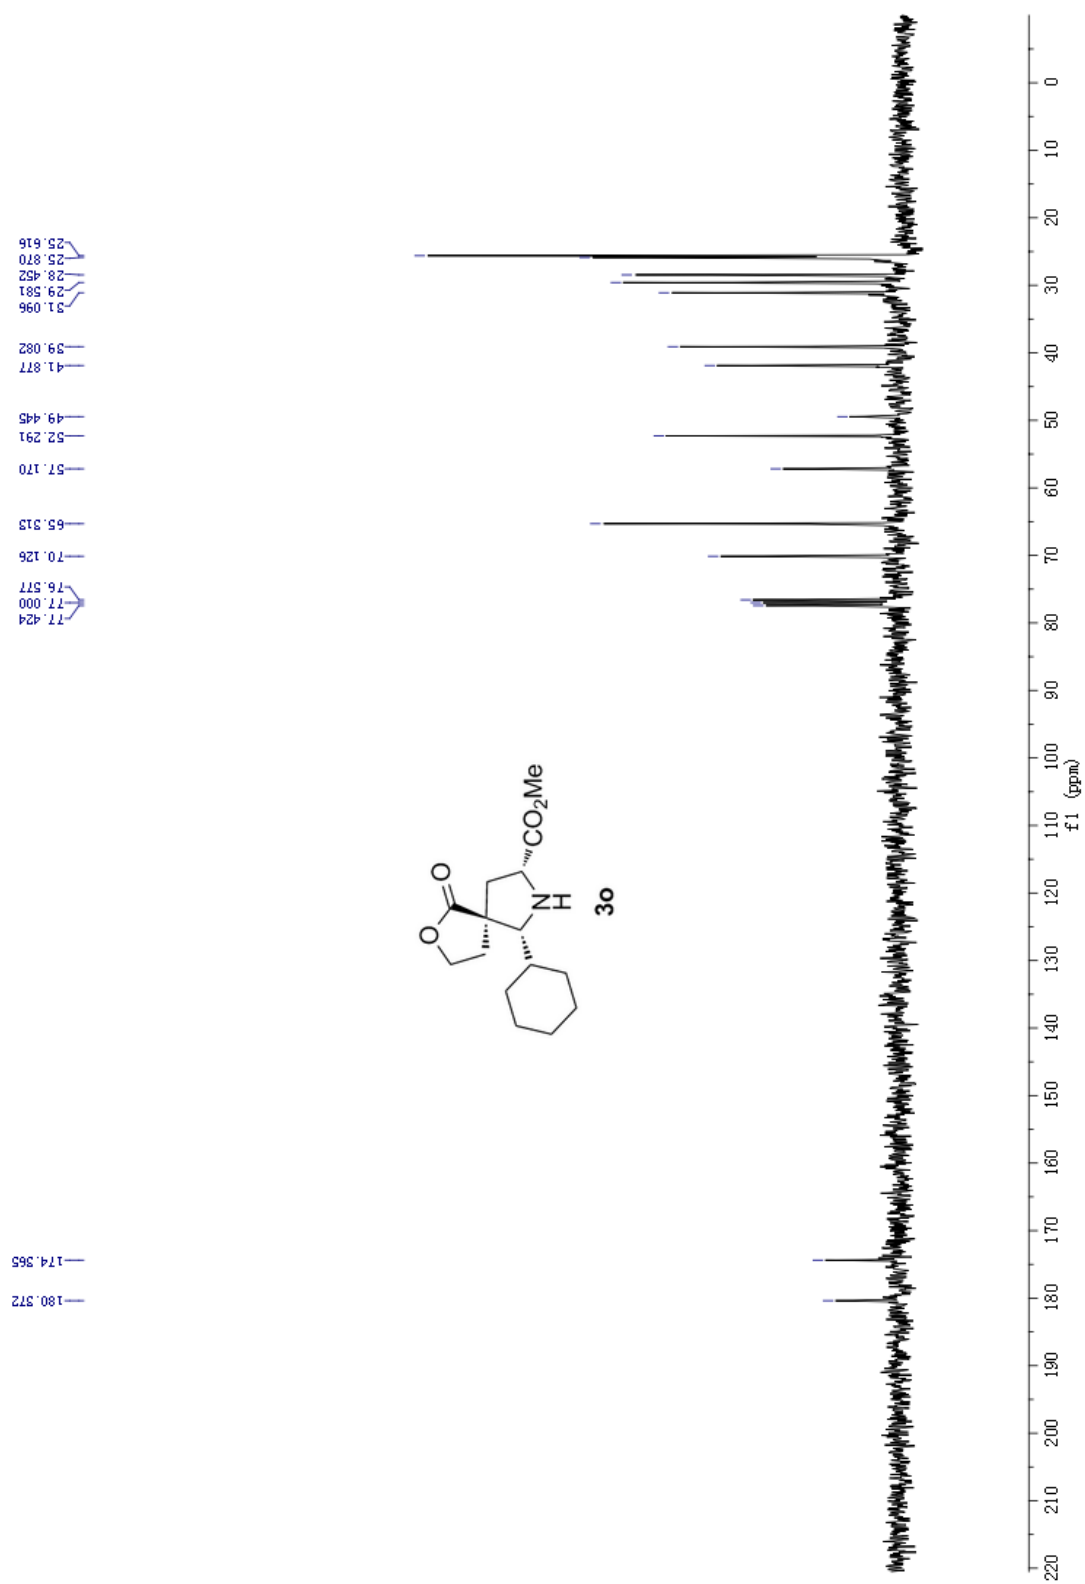

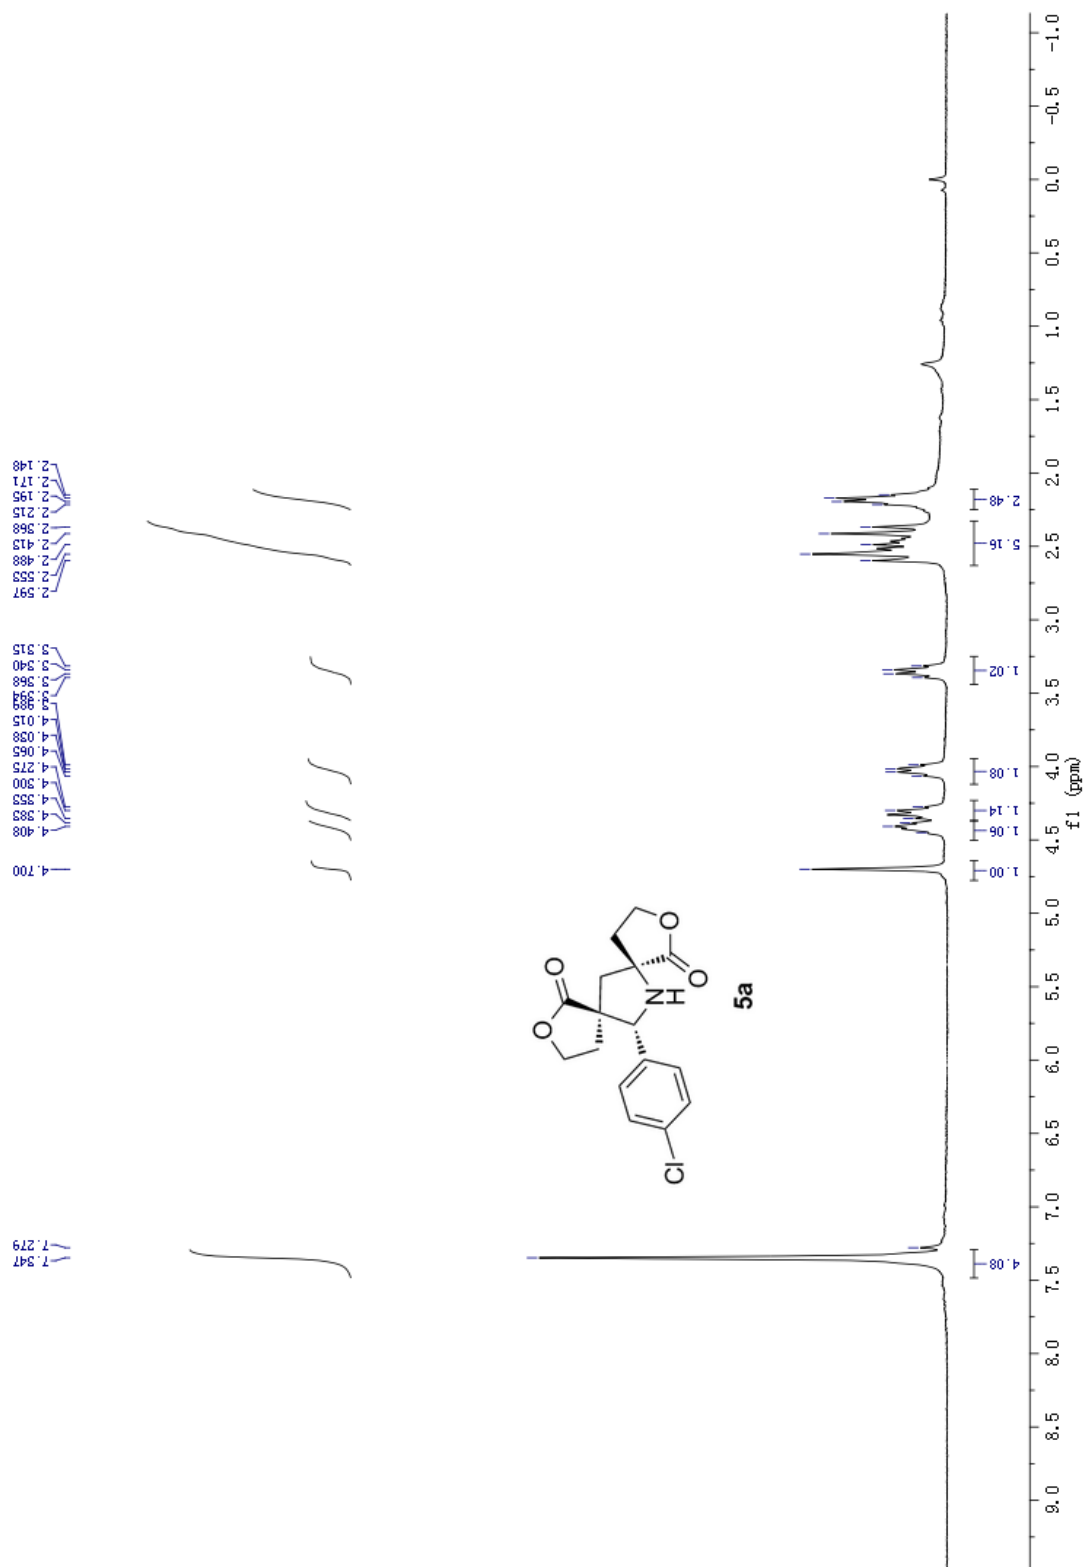

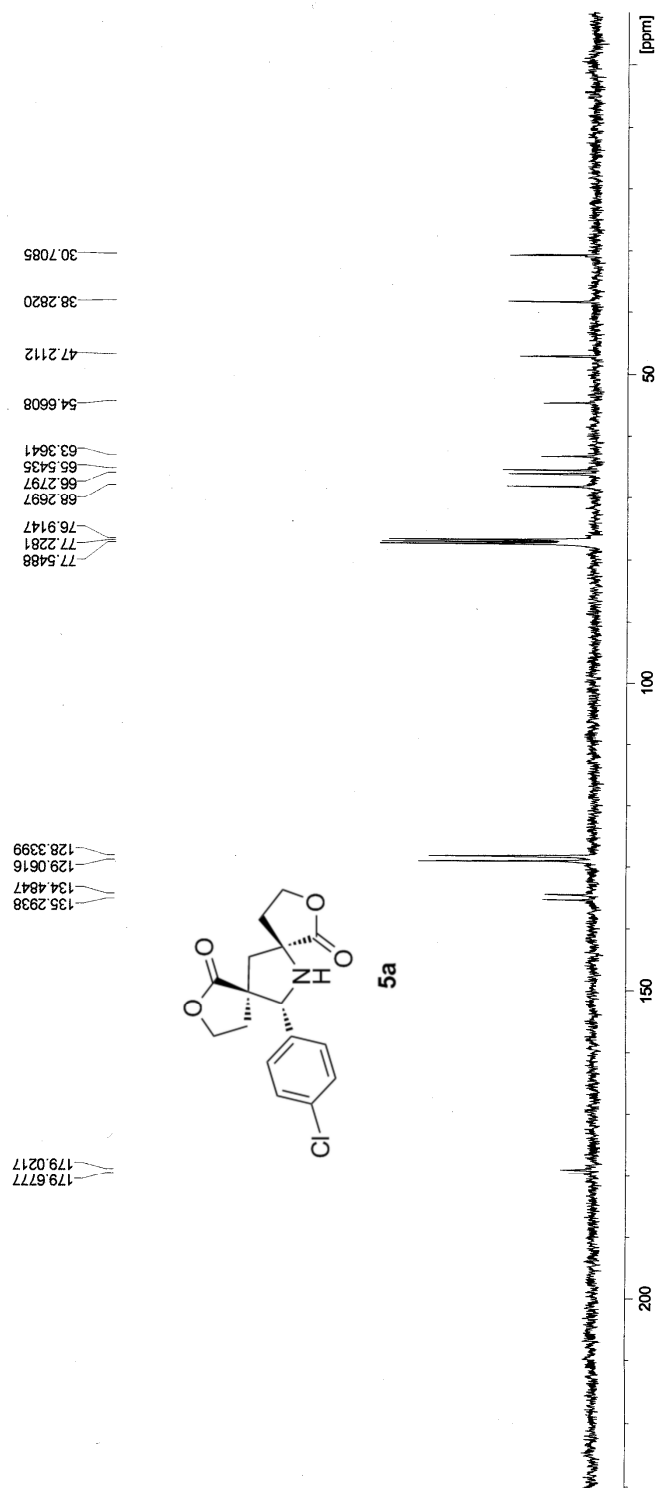

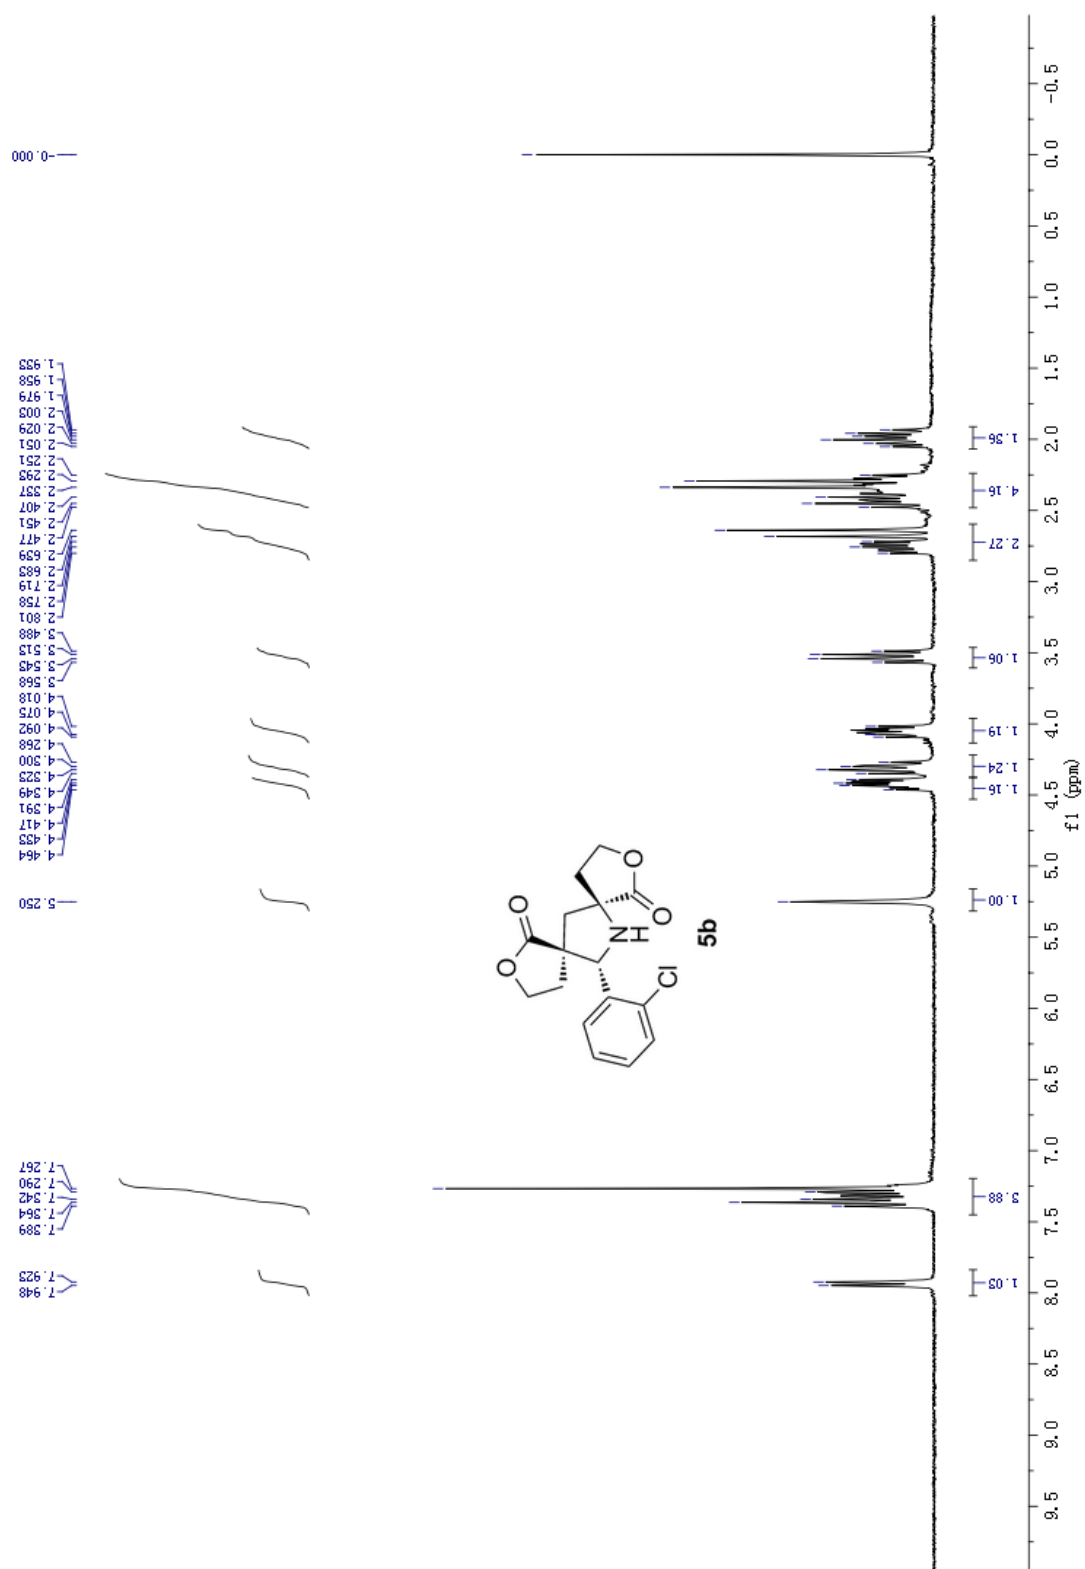



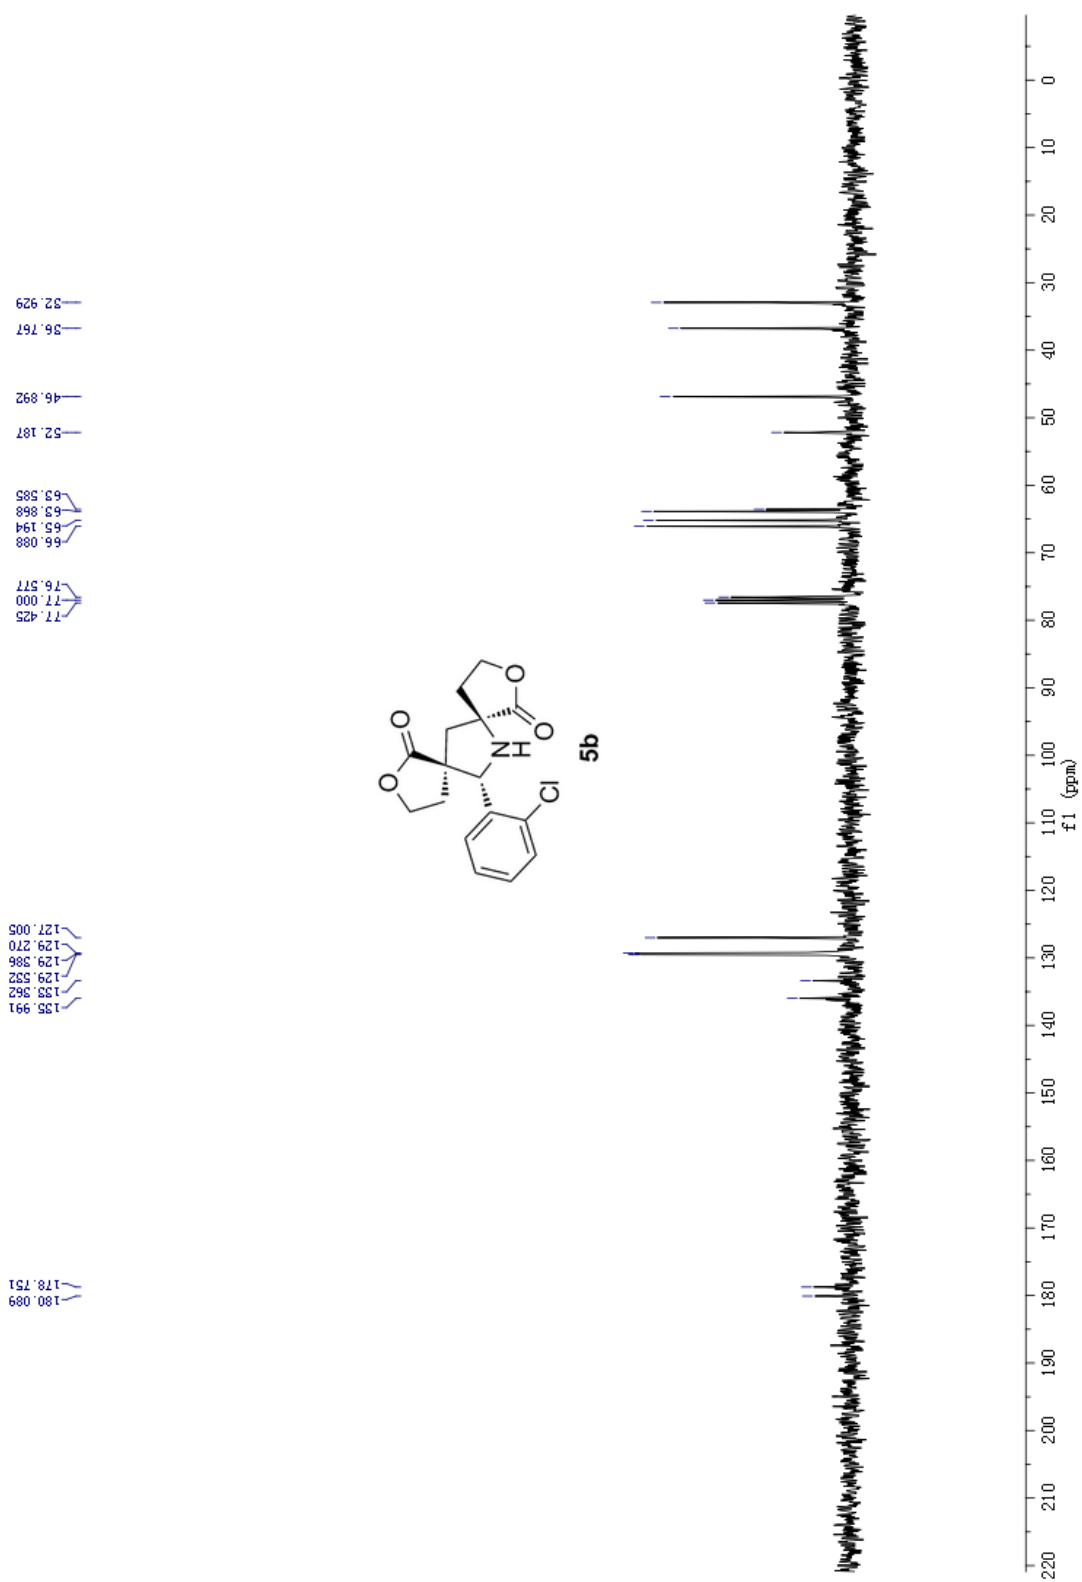

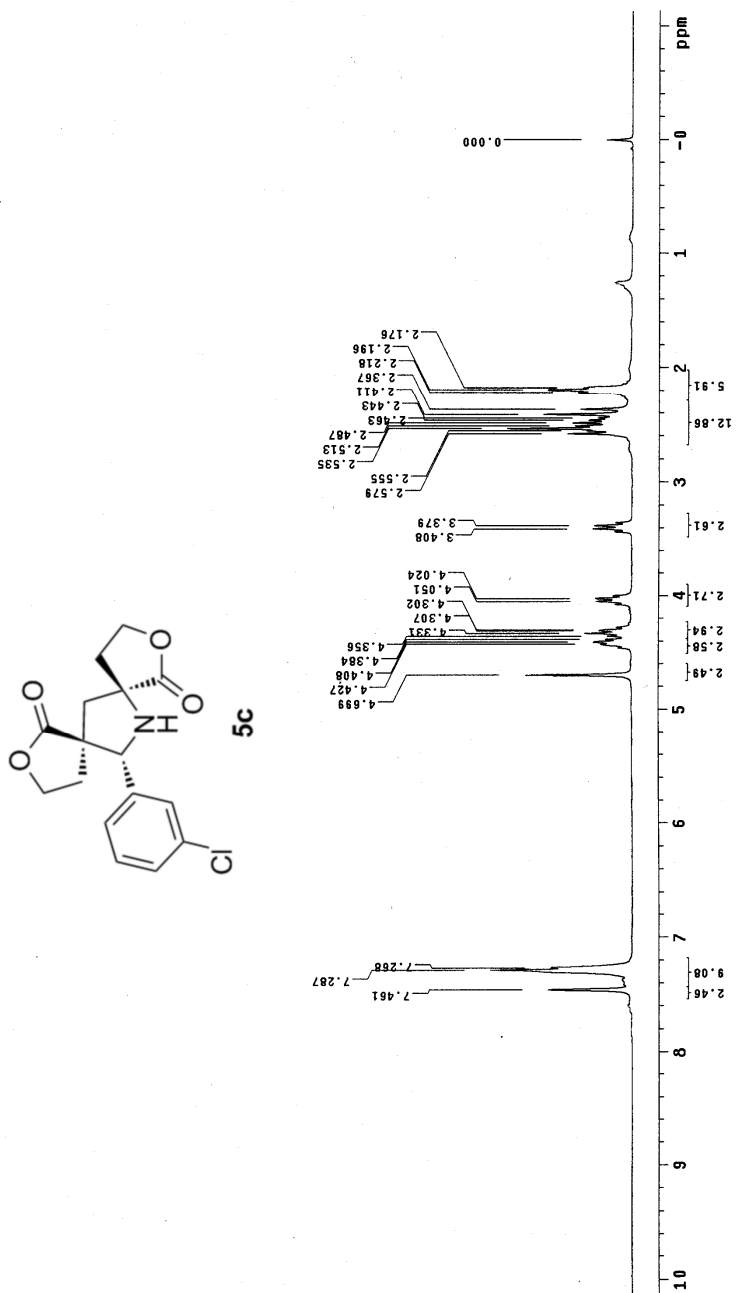

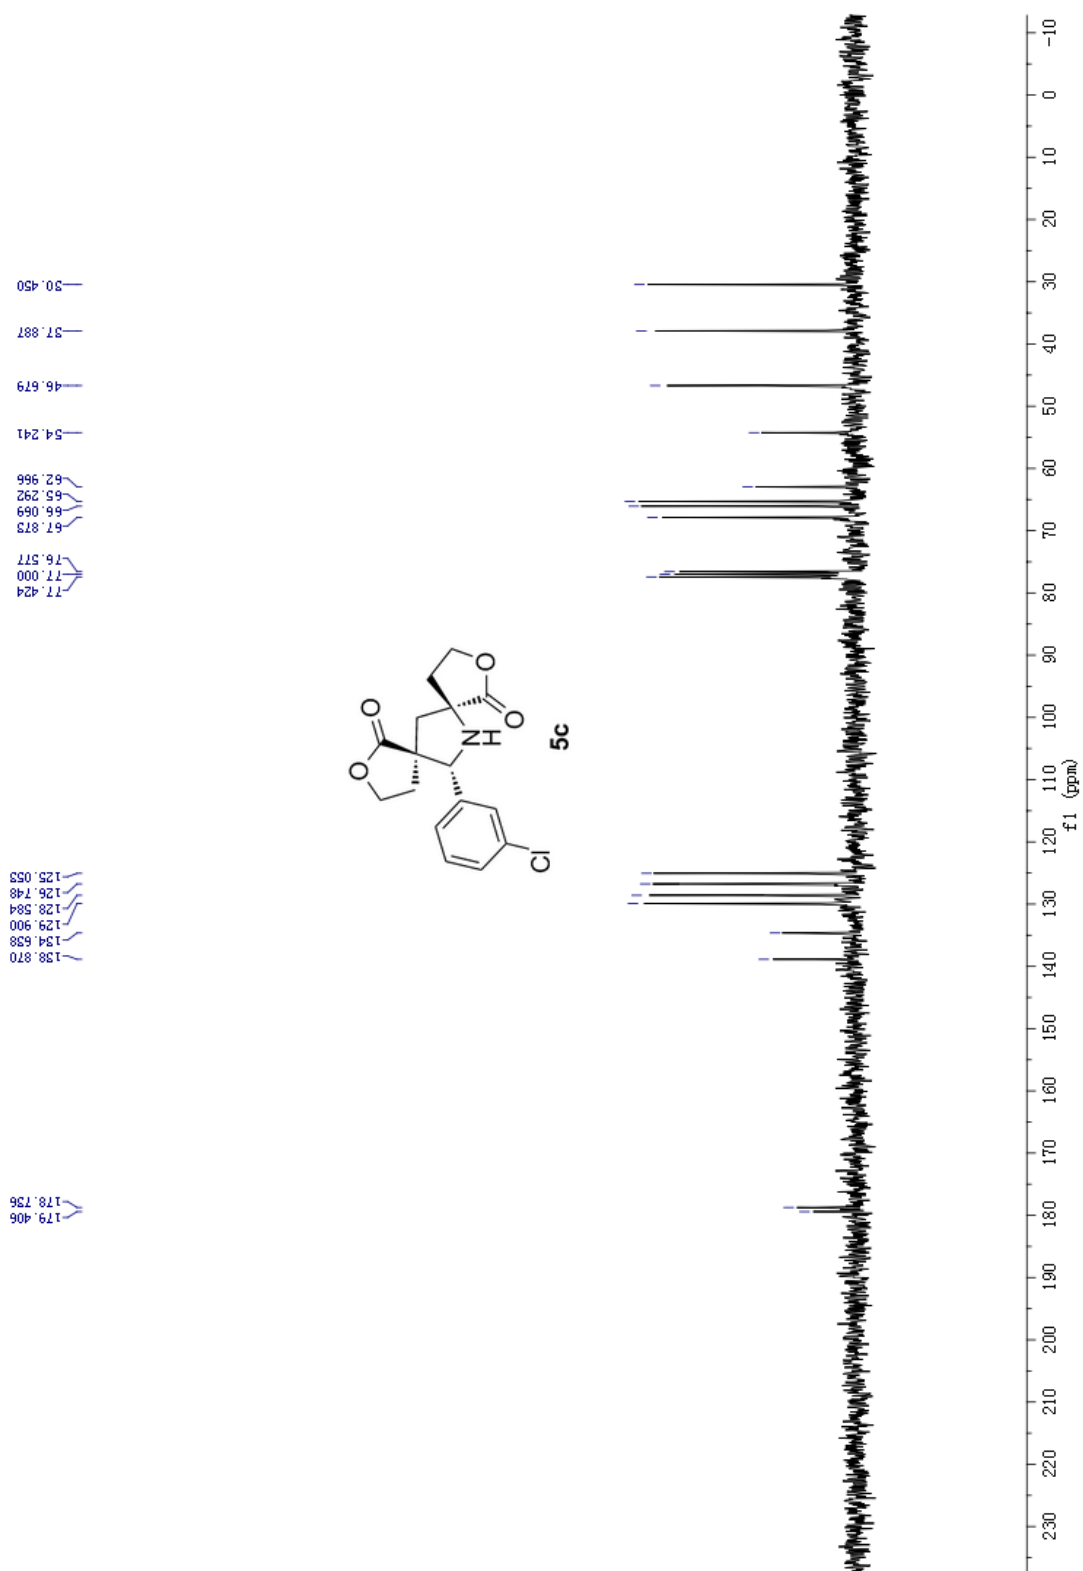

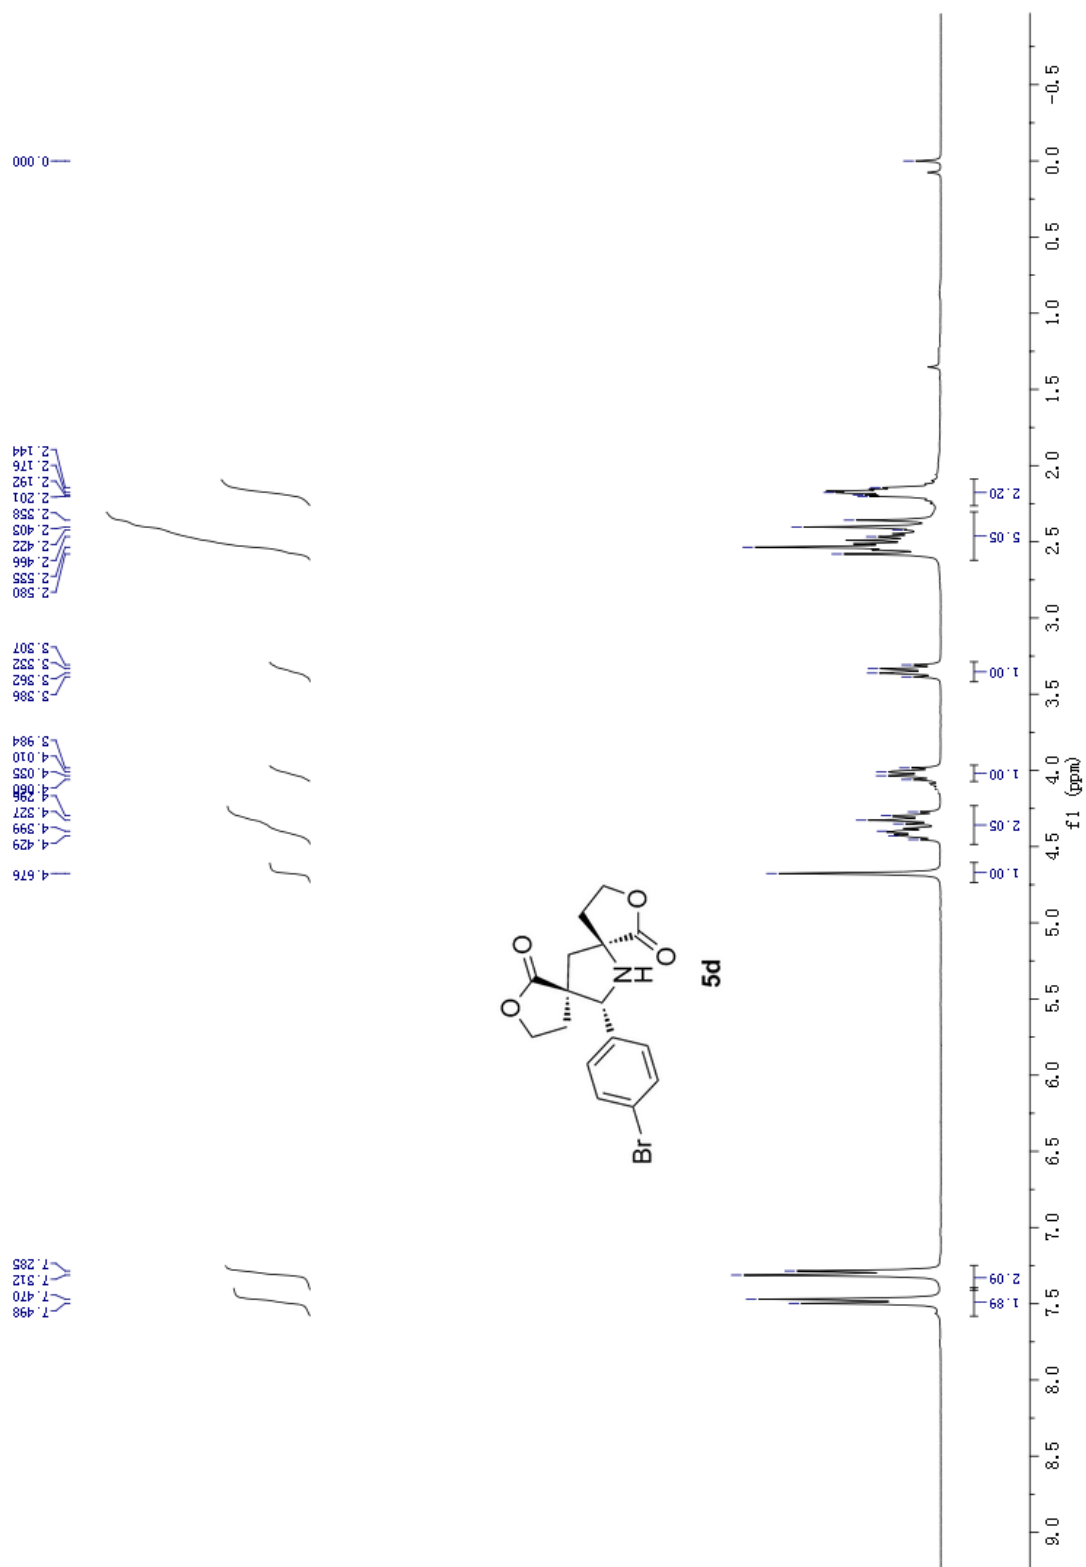

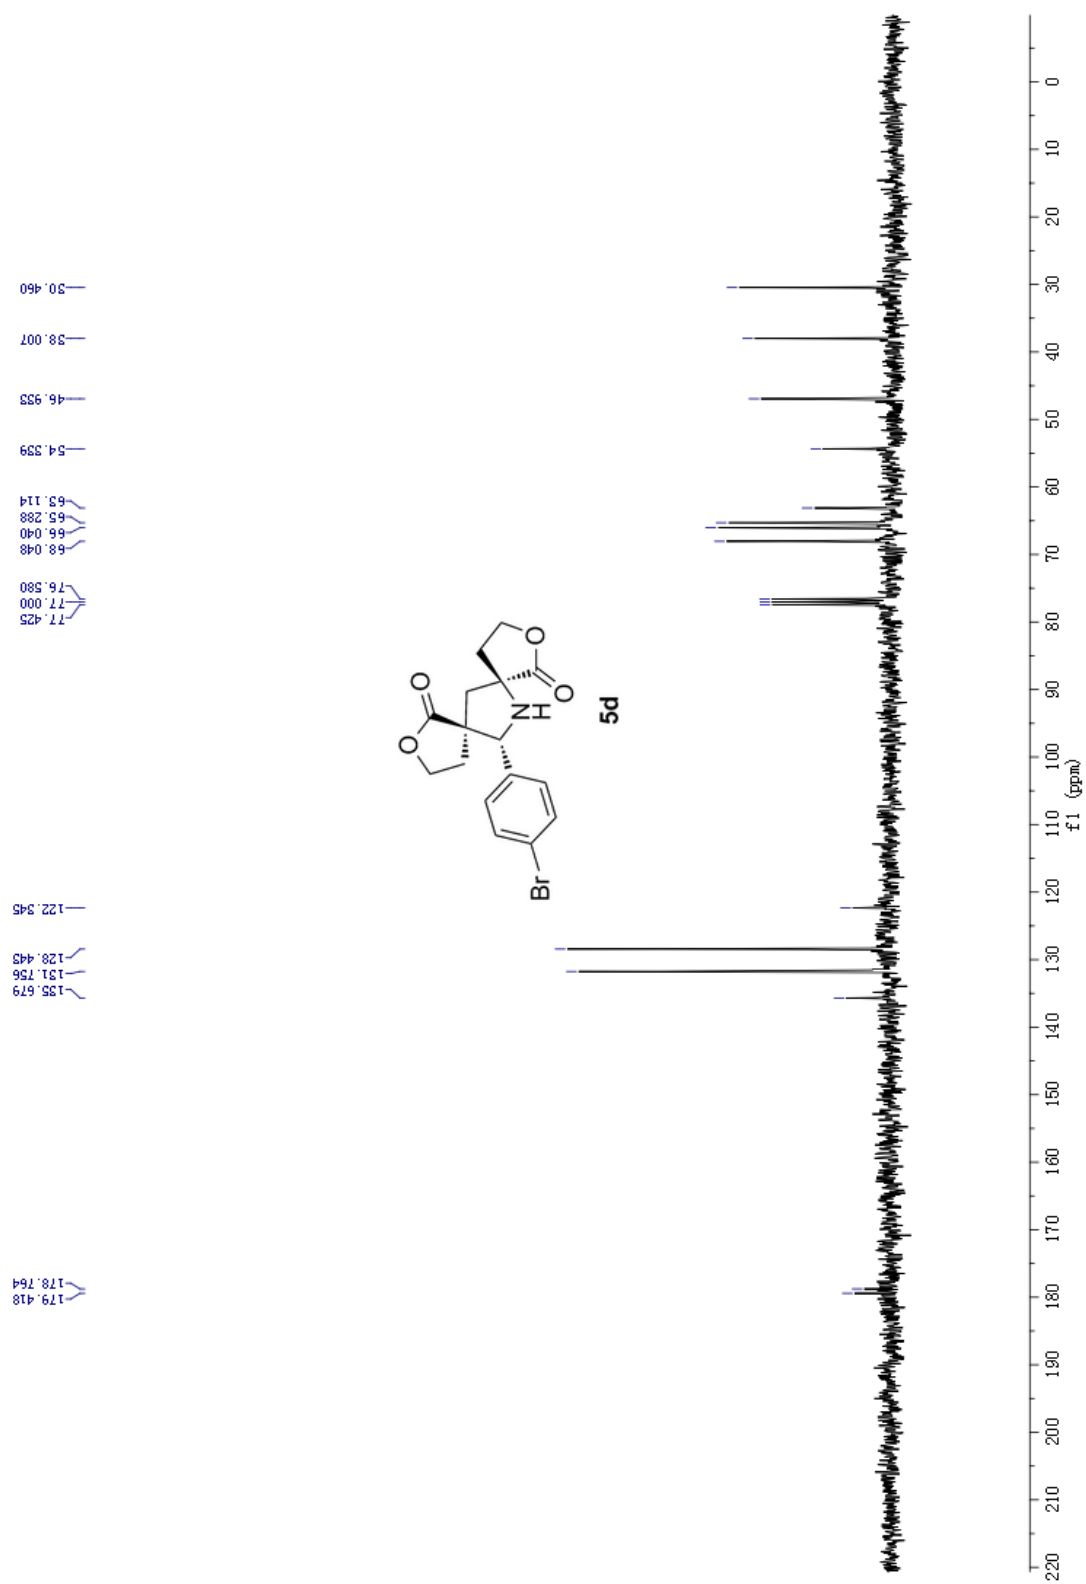

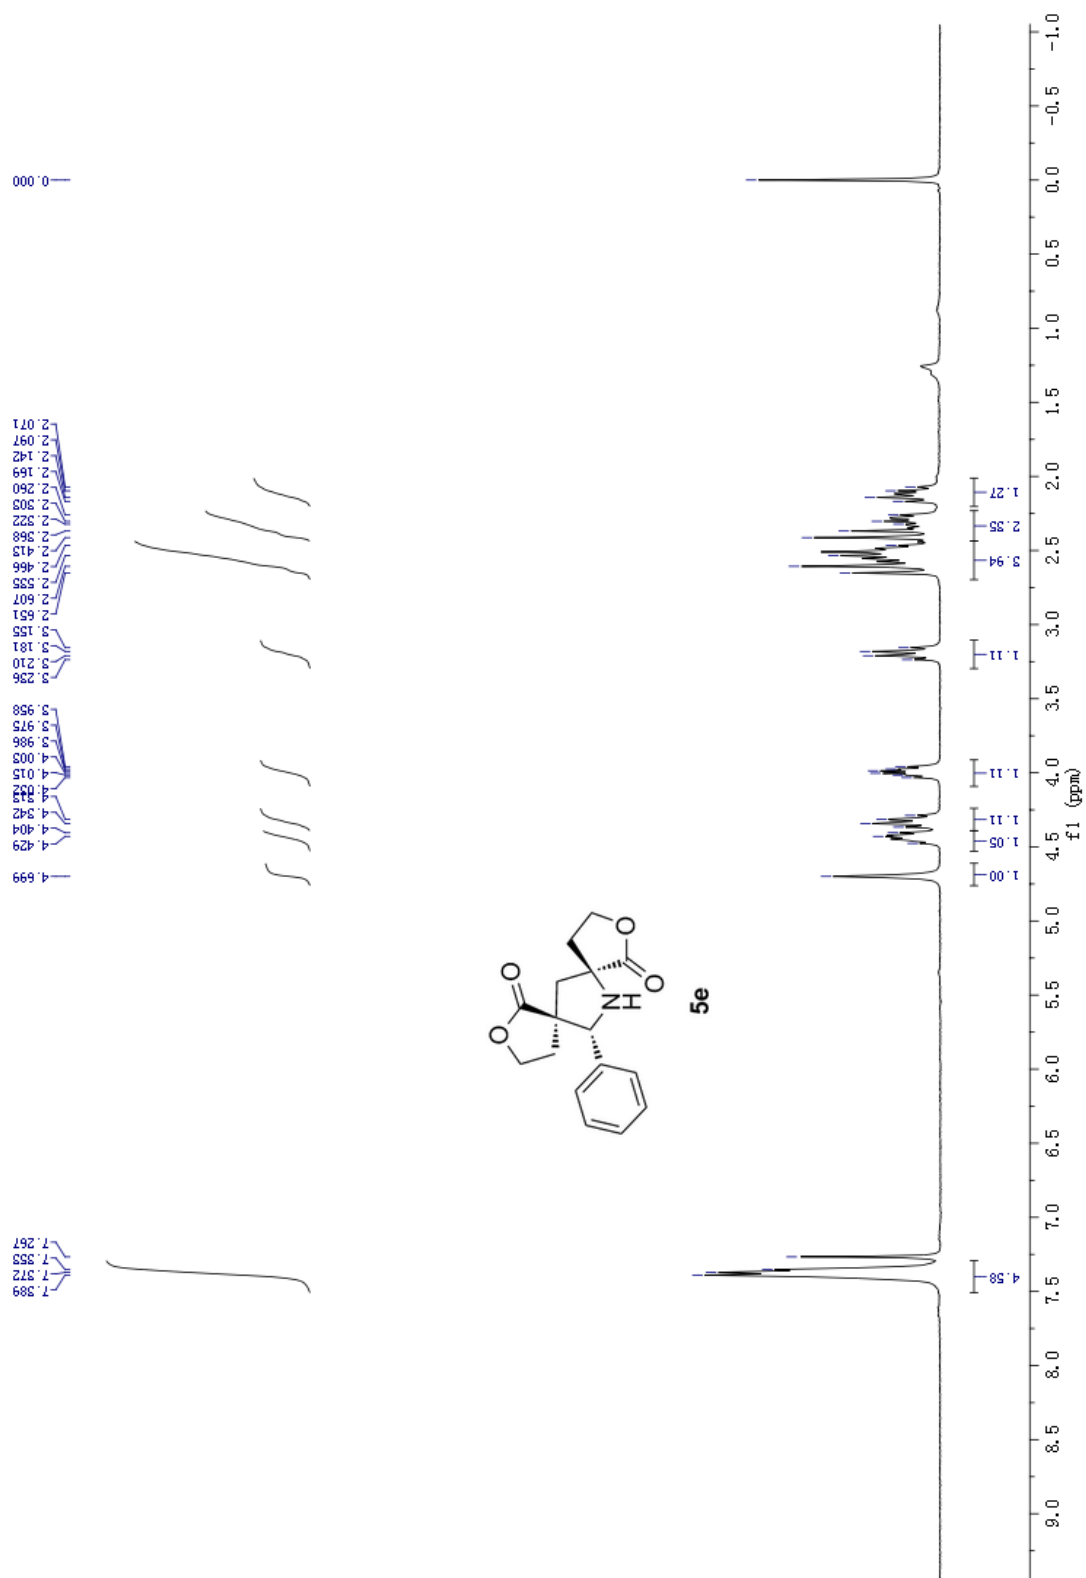

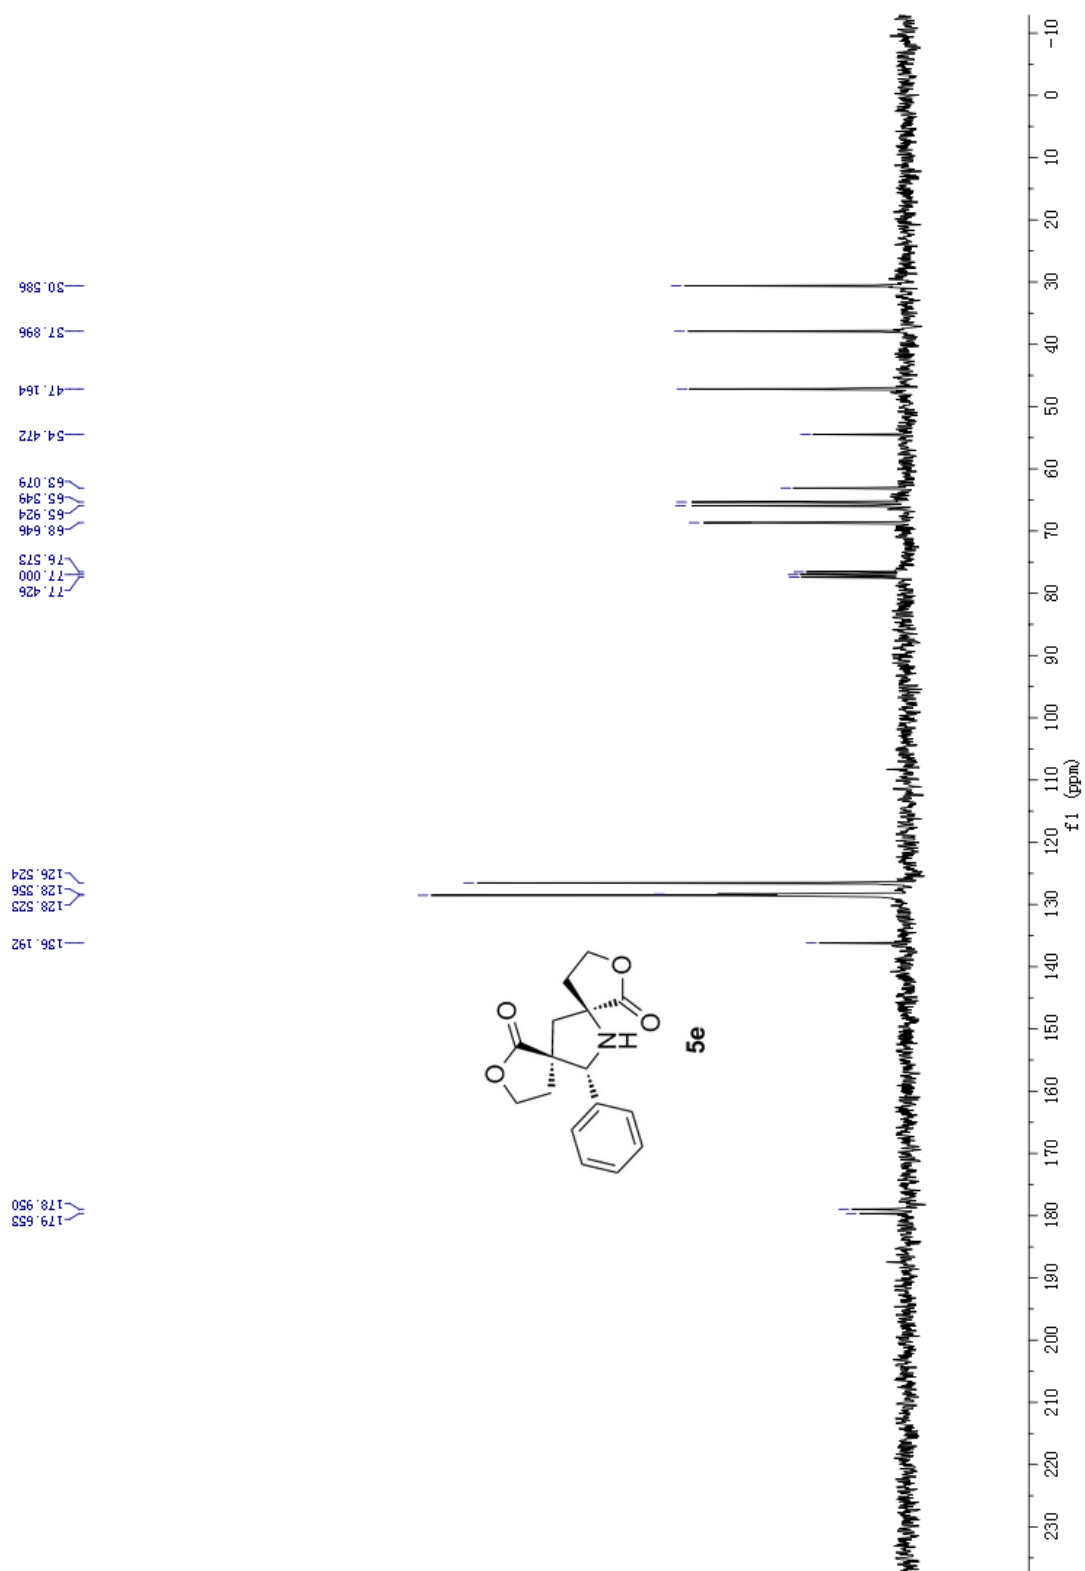

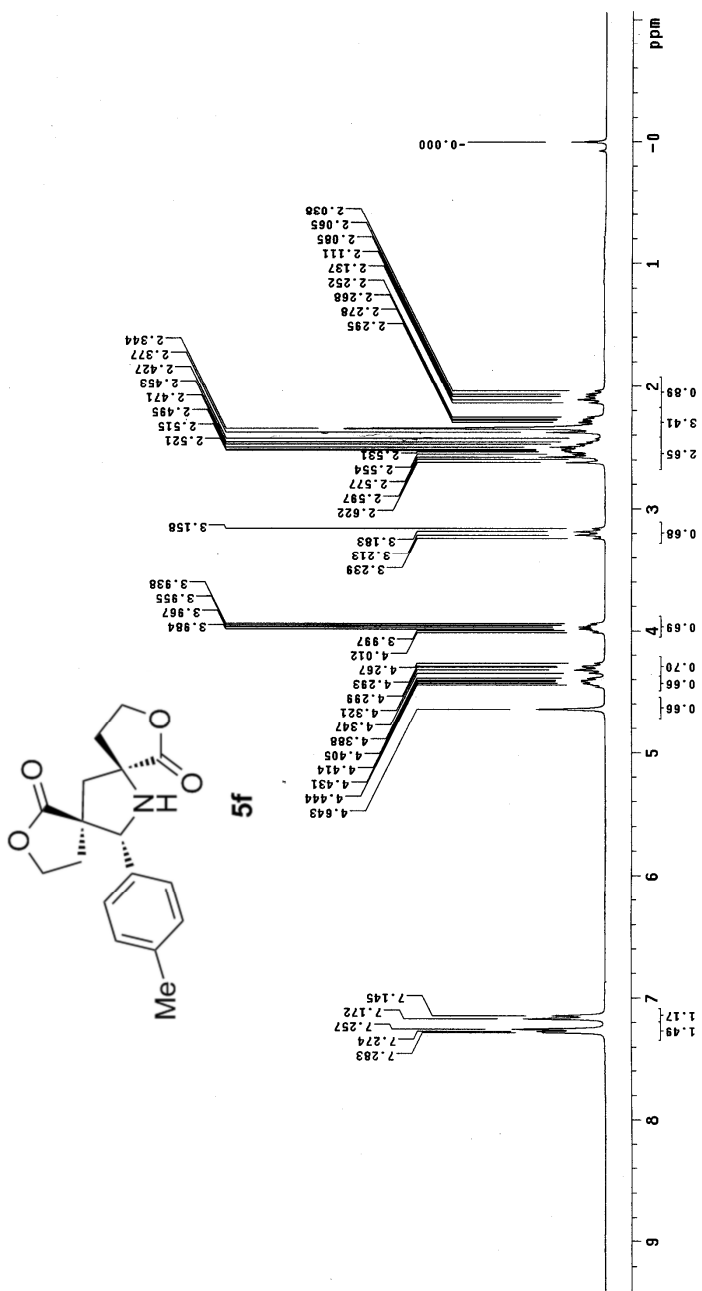



c13-1q4-6-48c

Solvent: CDCl<sub>3</sub>  
Ambient temperature  
Mercury-300EB "mercury300"

Relax. delay 1.000 sec  
Pulse 28.0 degrees  
Acq. time 0.999 sec  
Width 17699.1 Hz  
88 repetitions  
OBSERVE C13, 75.4552689 MHz  
Pulse 6  
Power 60 dB  
continuously on  
WALTZ-16 modulated  
Data PROCESSING  
Time 0.999 sec  
FI size 32768  
Total time 1 hr, 55 min, 27 sec

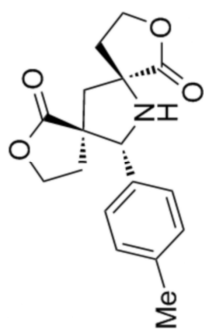

5f

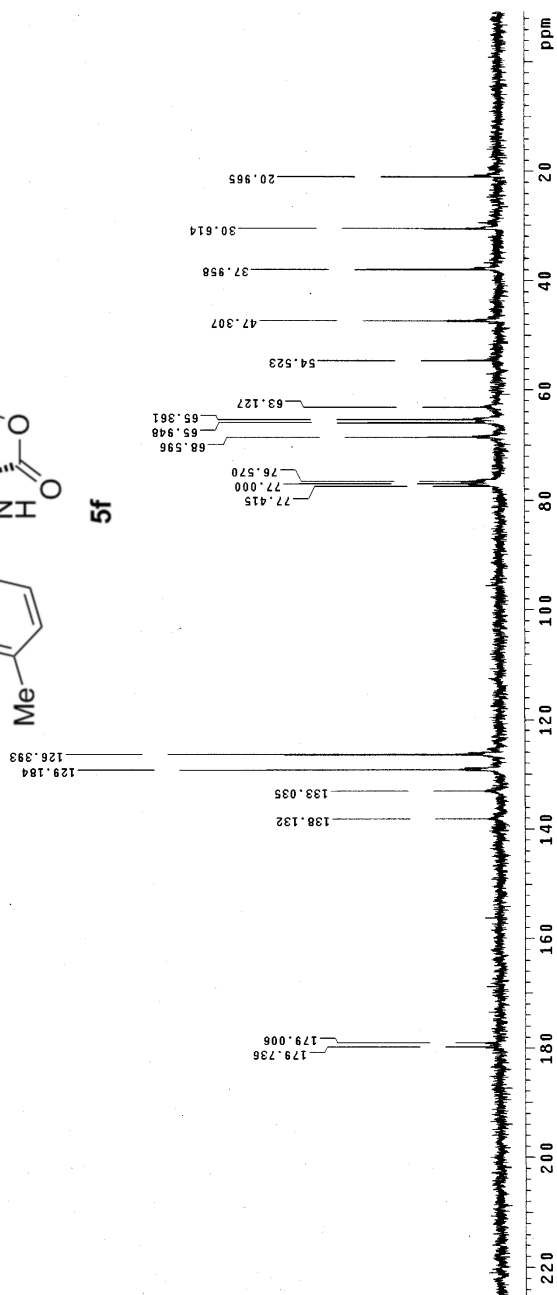

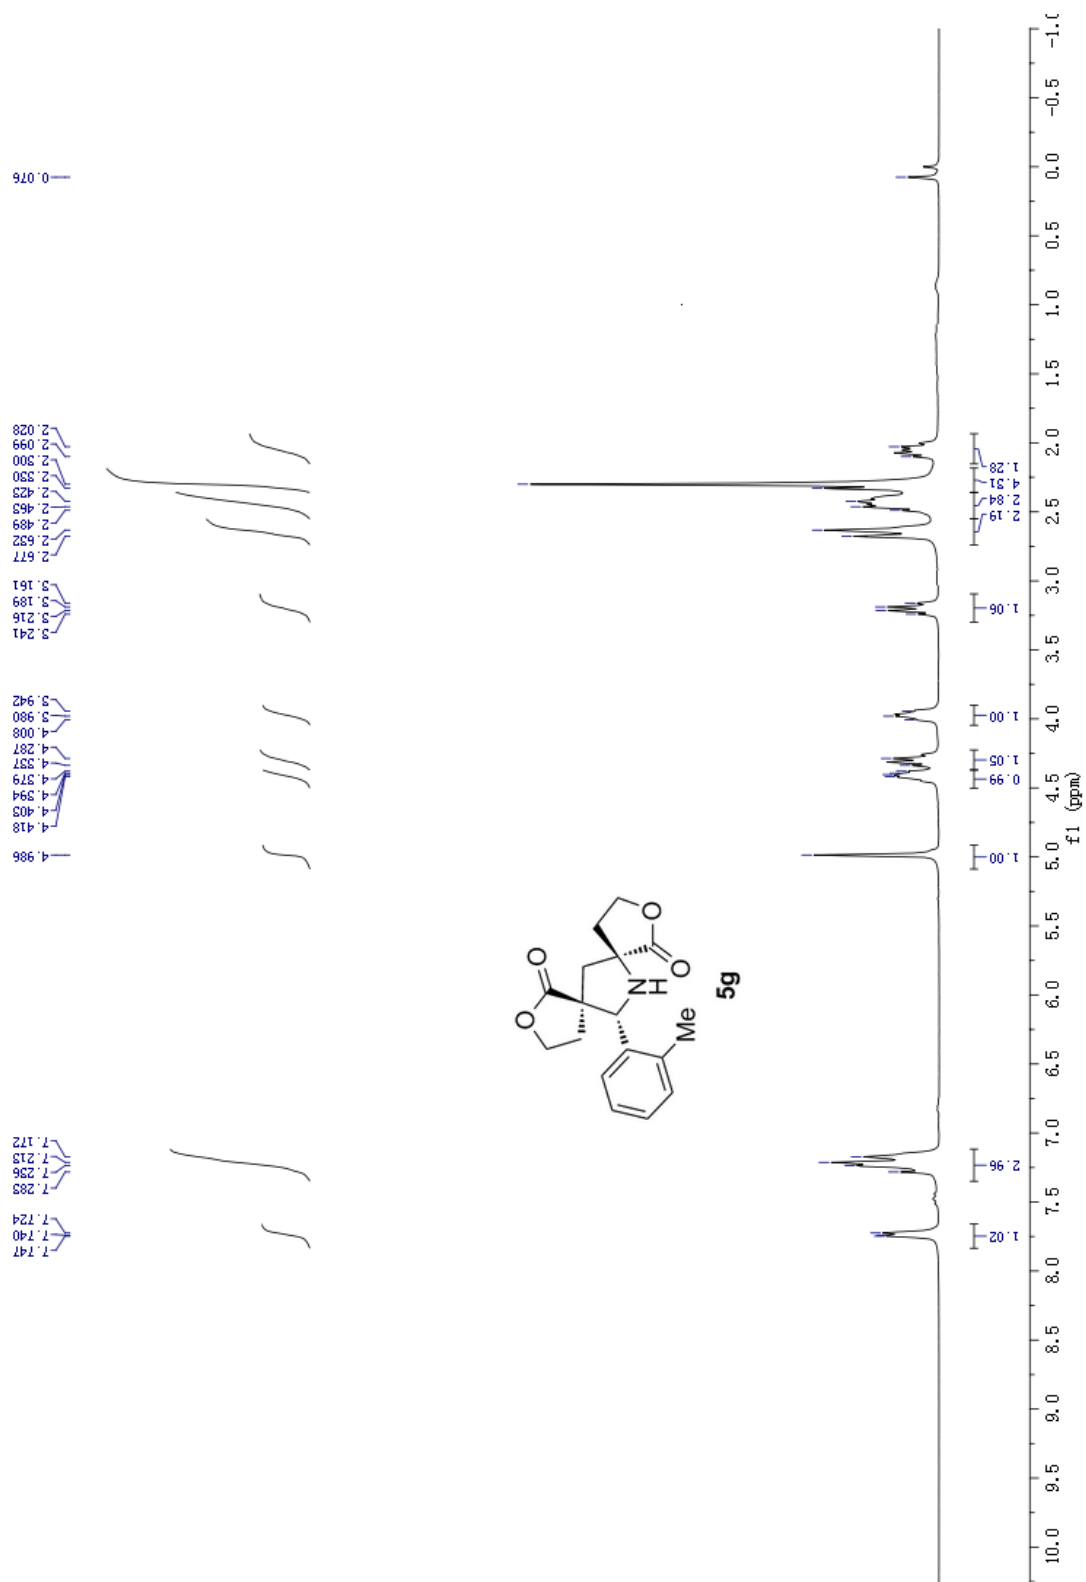

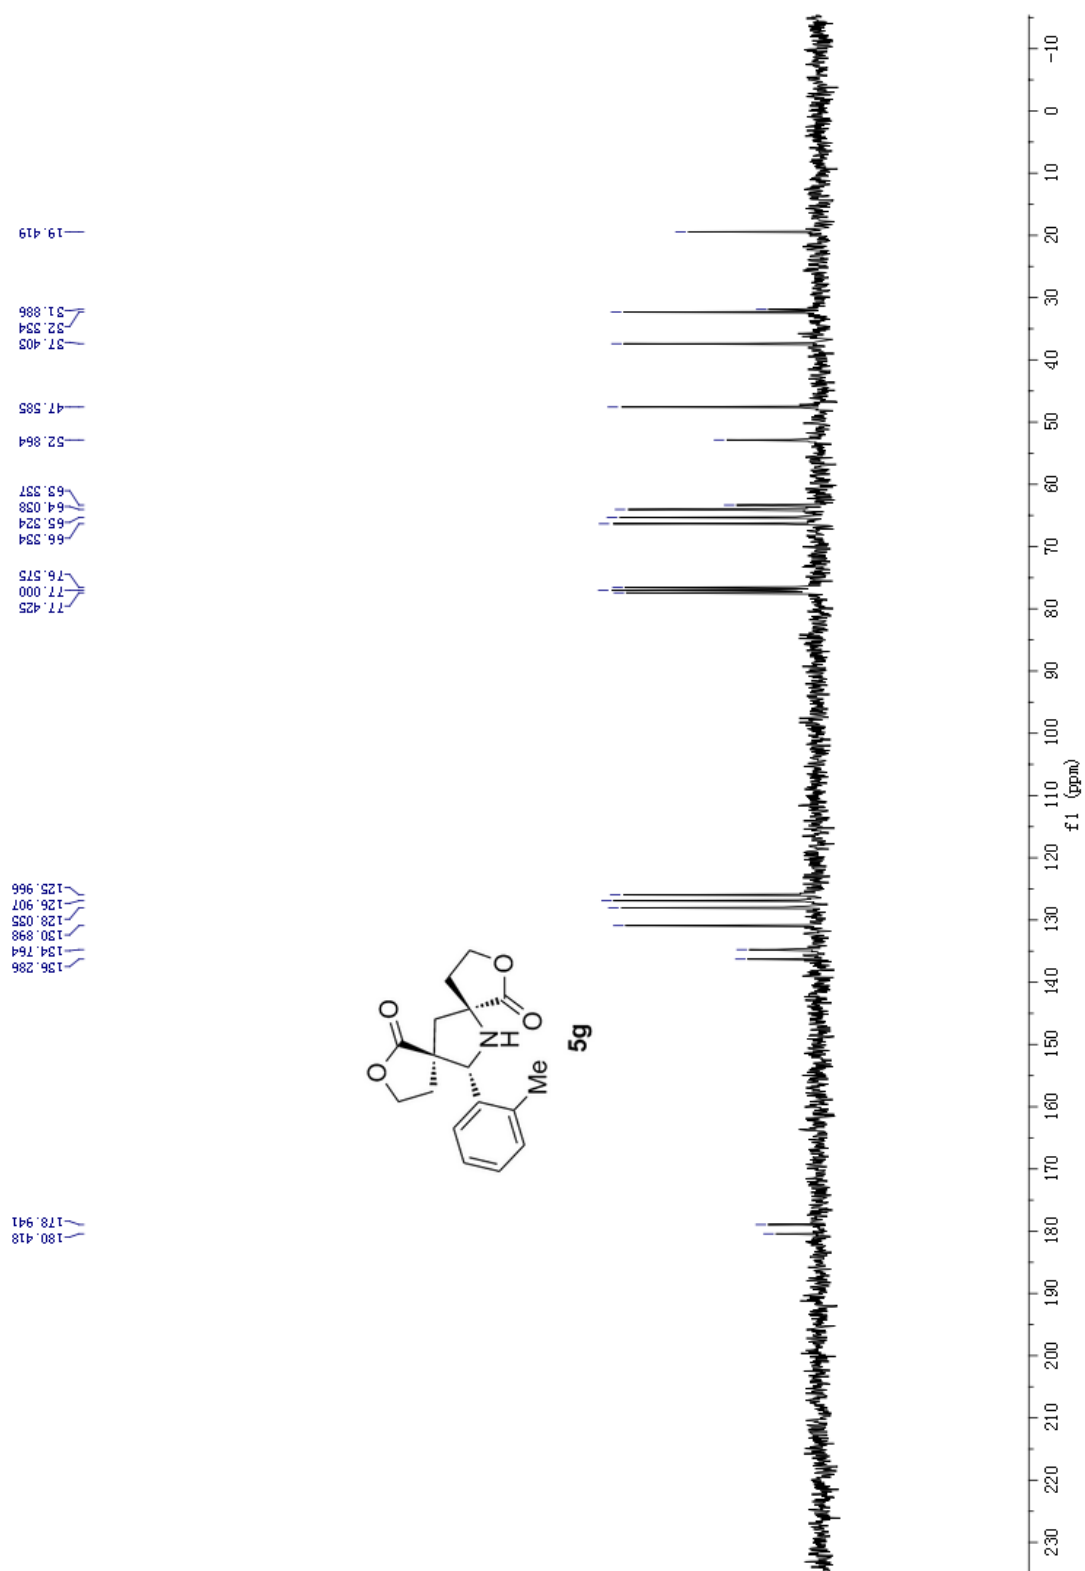

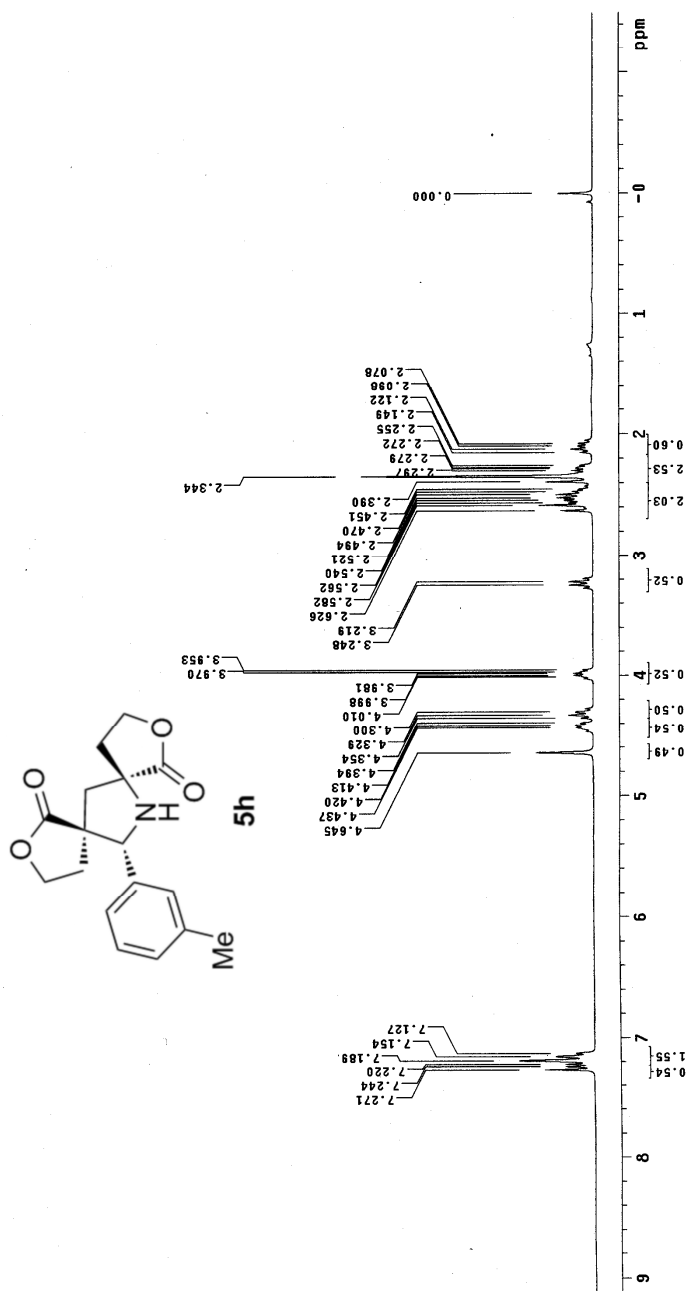

c13-1qj-6-111

Solvent: CDCl<sub>3</sub>  
Ambient temperature  
Mercury-300BB "mercury300"

Relax. delay 1.000 sec  
Pulse 28.0 degrees  
Acq. time 0.489 sec  
Width 17699.1 Hz  
Sweep rate 75.4552858 MHz  
OBSERVED F1 300.0821362 MHz  
Power 40 dB  
Continuously on  
Waltz16 deleted  
DATA PROCESSING  
Line broadening 2.0 Hz  
FT size 32768  
Total time 1 hr, 55 min, 27 sec

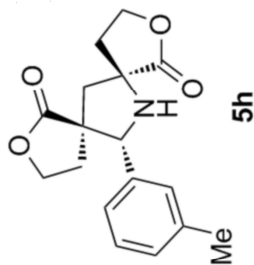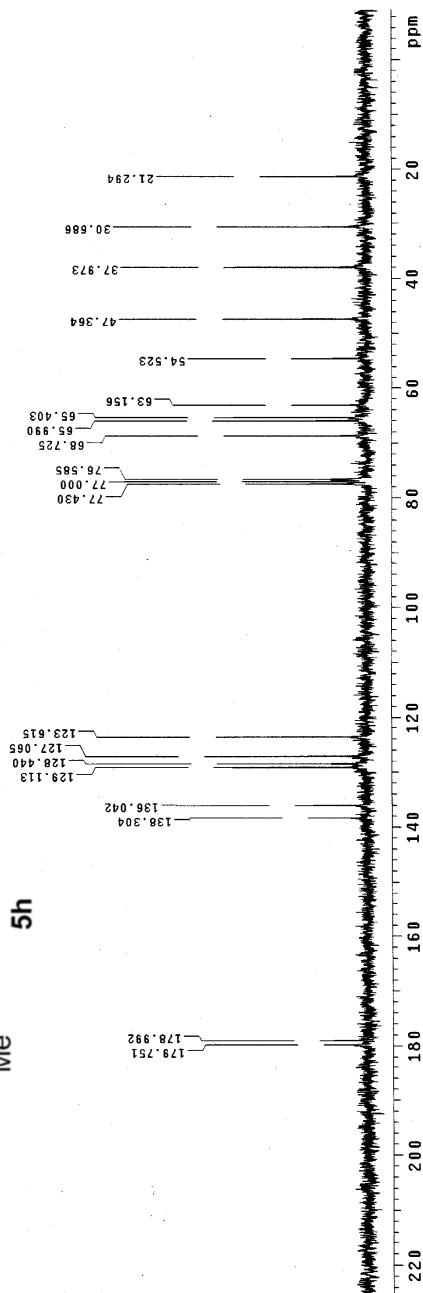

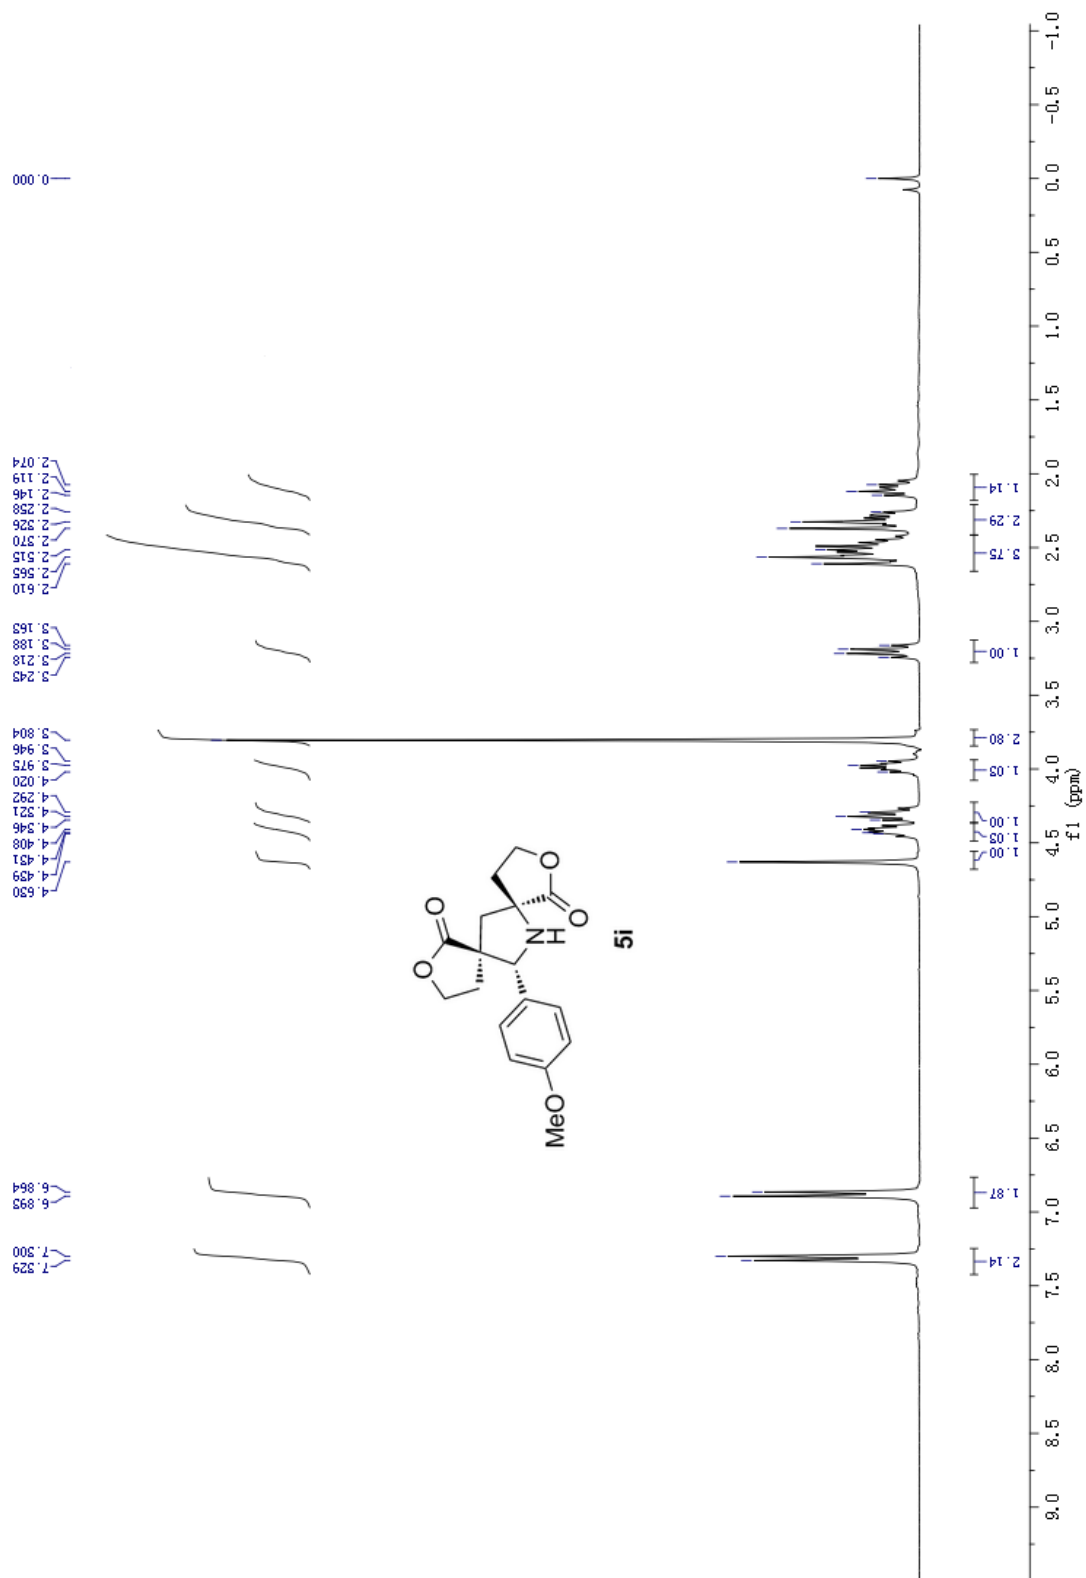

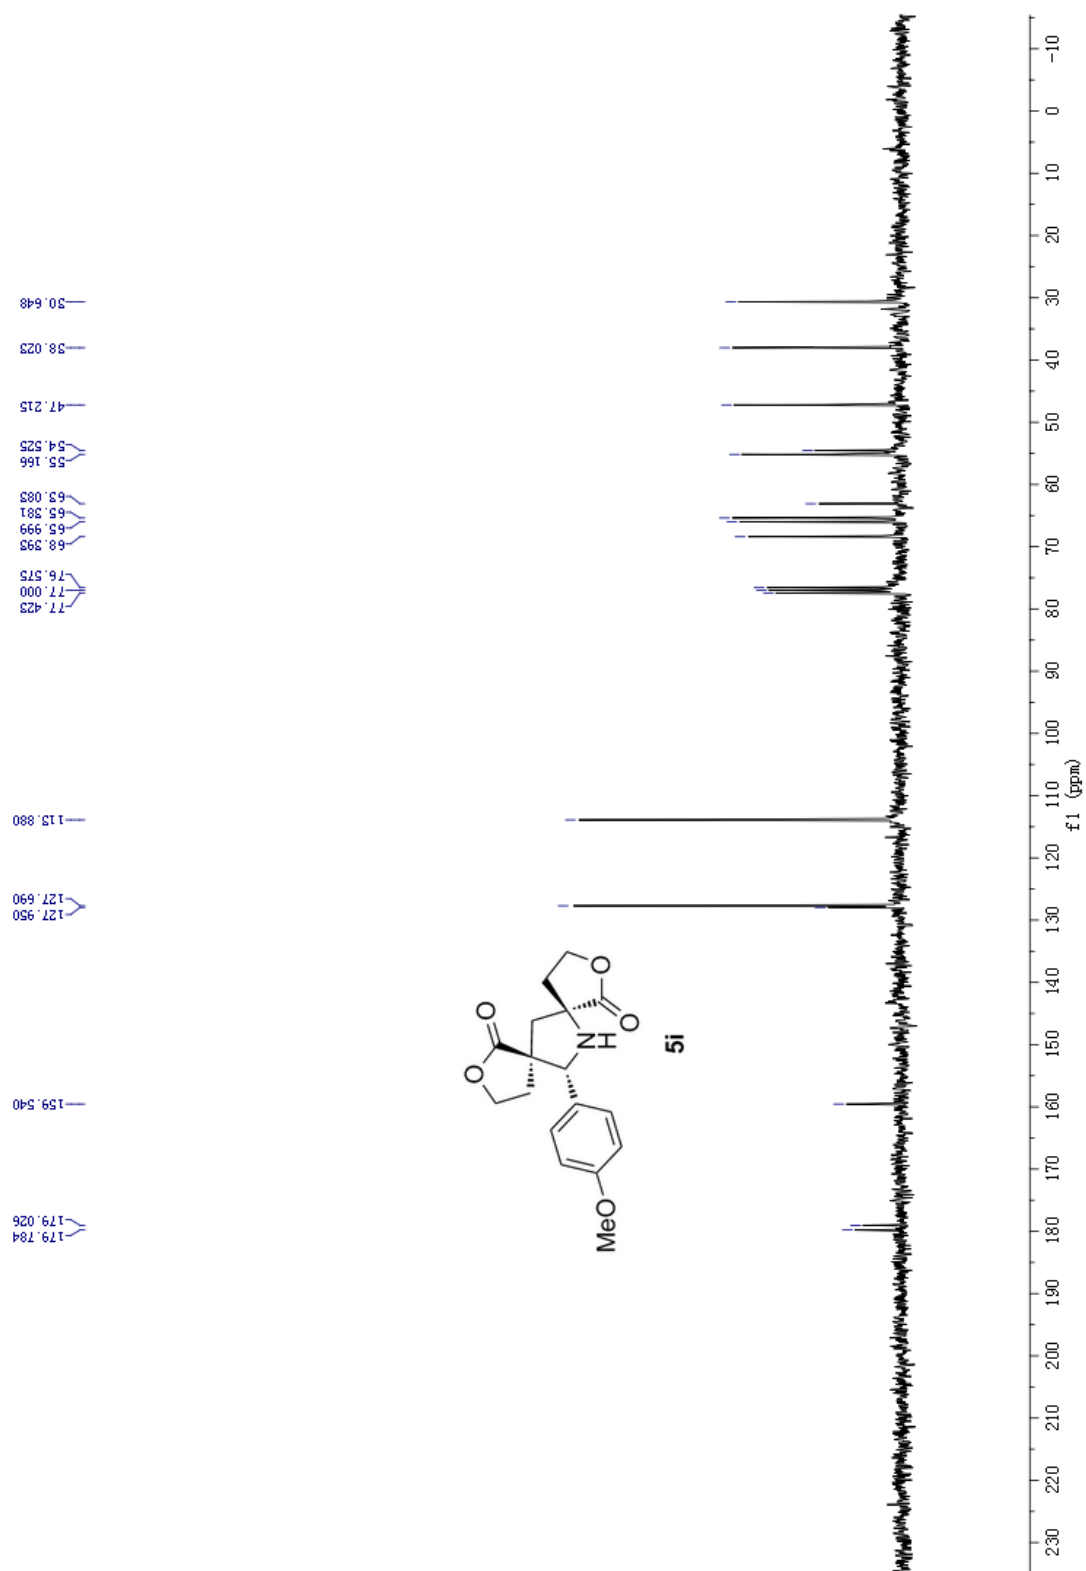

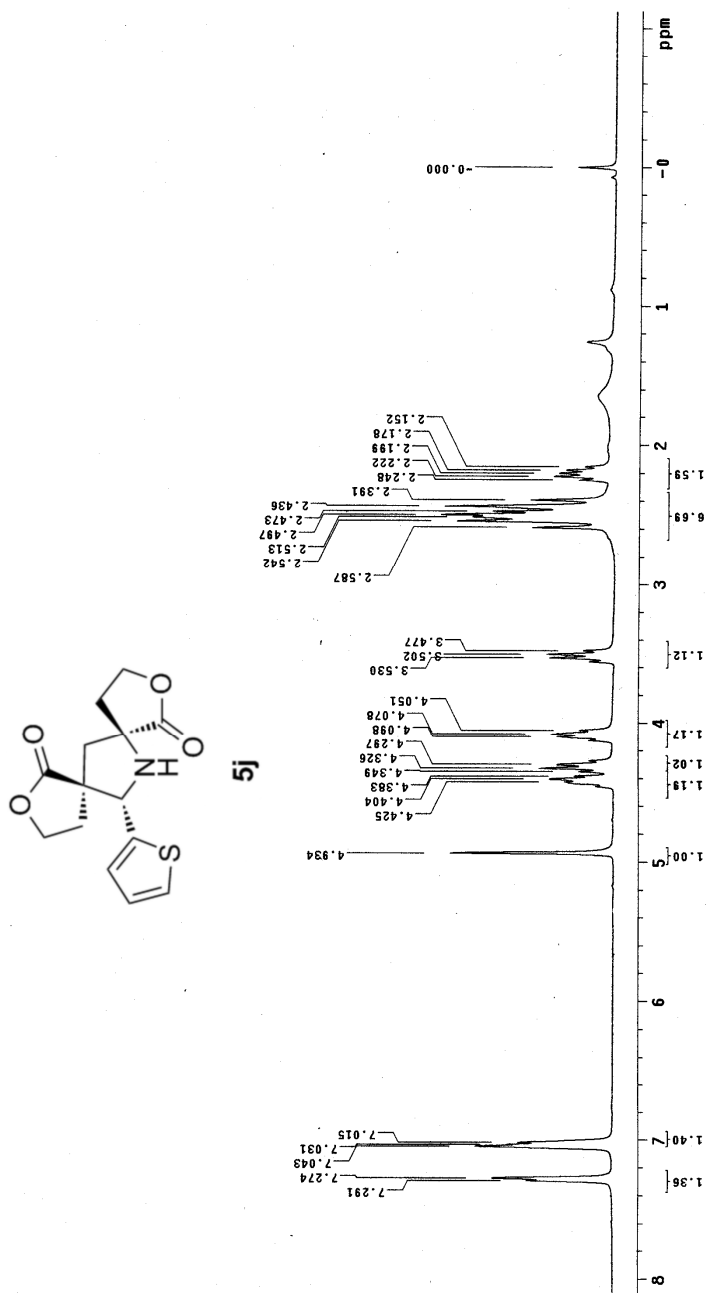



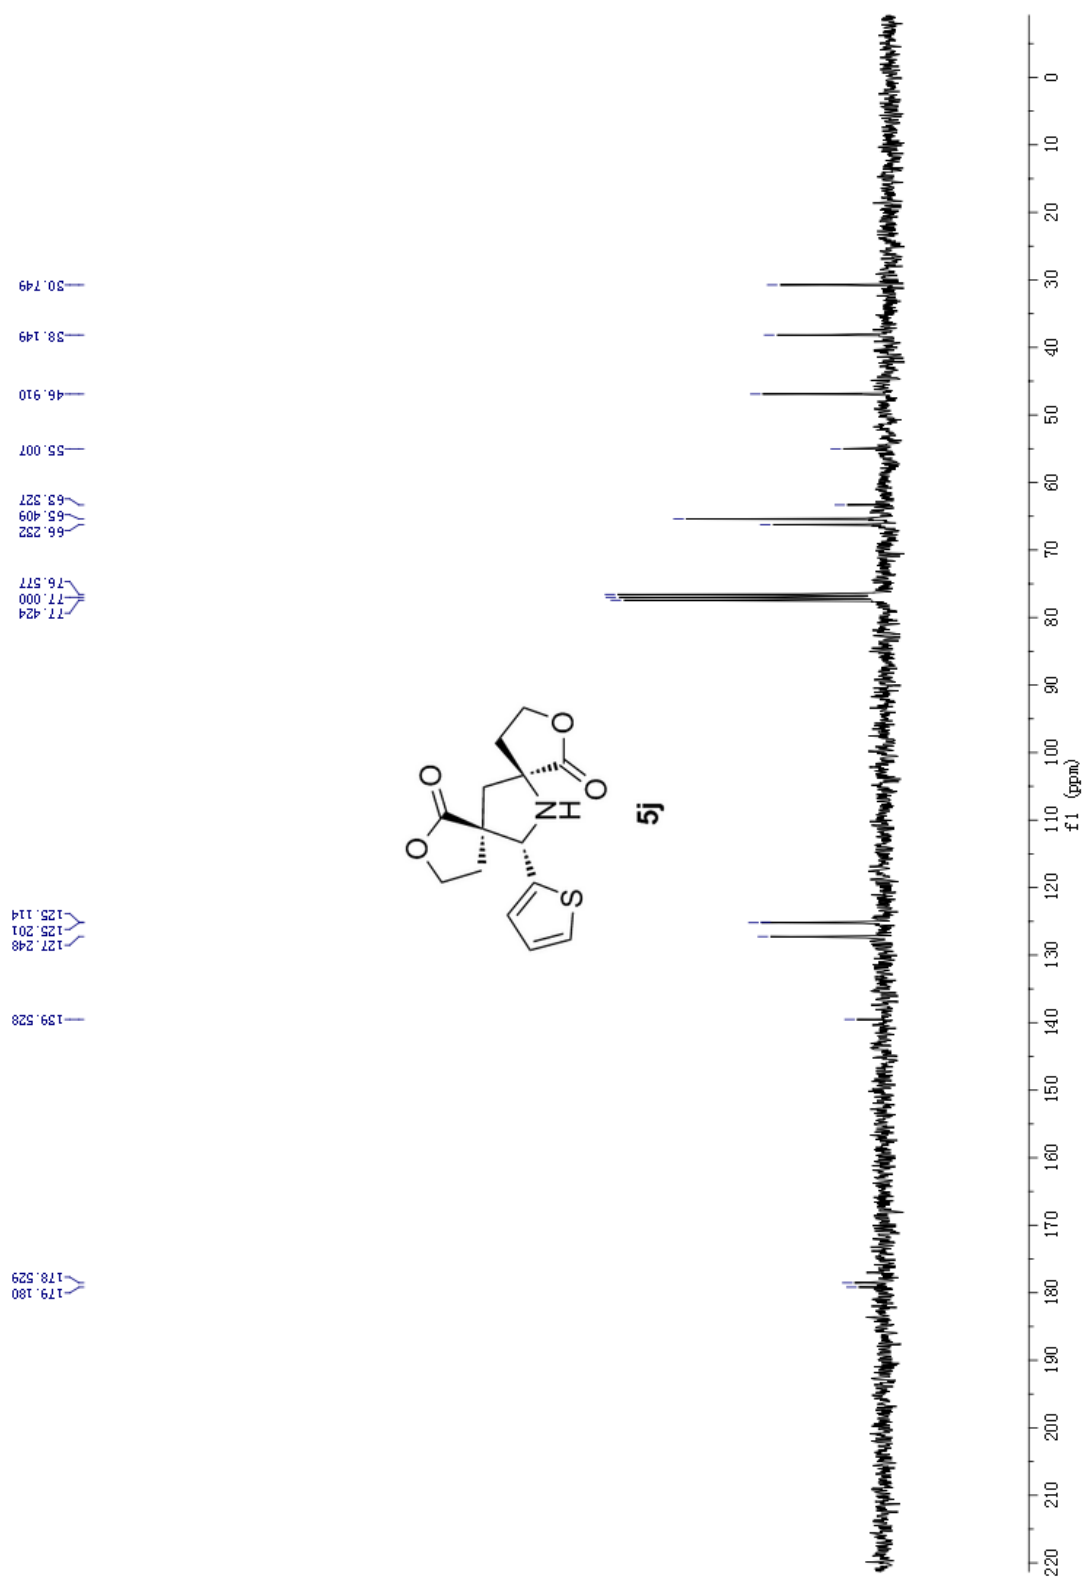

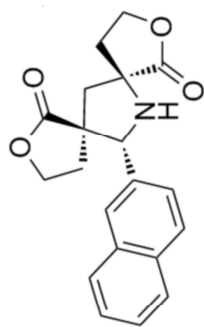

5k

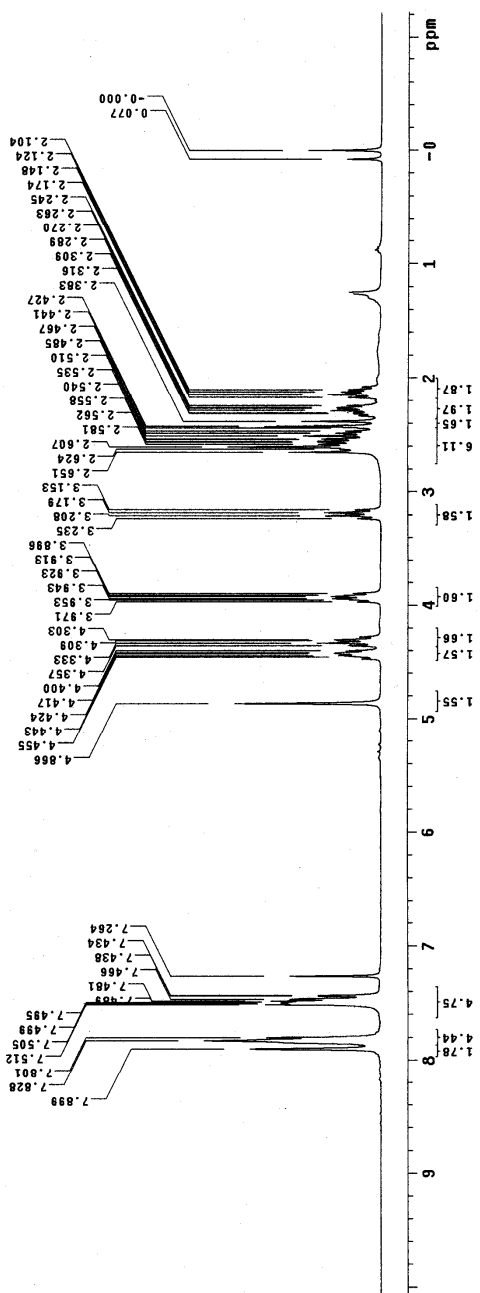

ydc-2-1031

Solvent: D2O  
Ambient temperature  
Mercury-300BB "mercury300"

Relax. delay: 1.000 sec  
Pulse: 28.0 degrees  
Acq. time: 0.350 sec  
Width: 18867.9 Hz  
Sweep rate: 100.000 Hz  
OBSERVE F1: 300.0824339 MHz  
DECOUPLE H1: 300.0824339 MHz  
Power: 39 dB  
continuously on  
continuously off  
DATA PROCESSING  
Line broadening: 4.0 Hz  
FT size: 16384  
Total time: 4 hr, 17 min, 25 sec

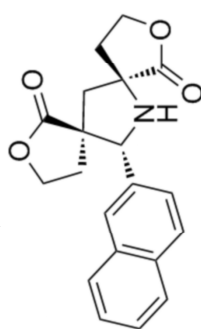

5k

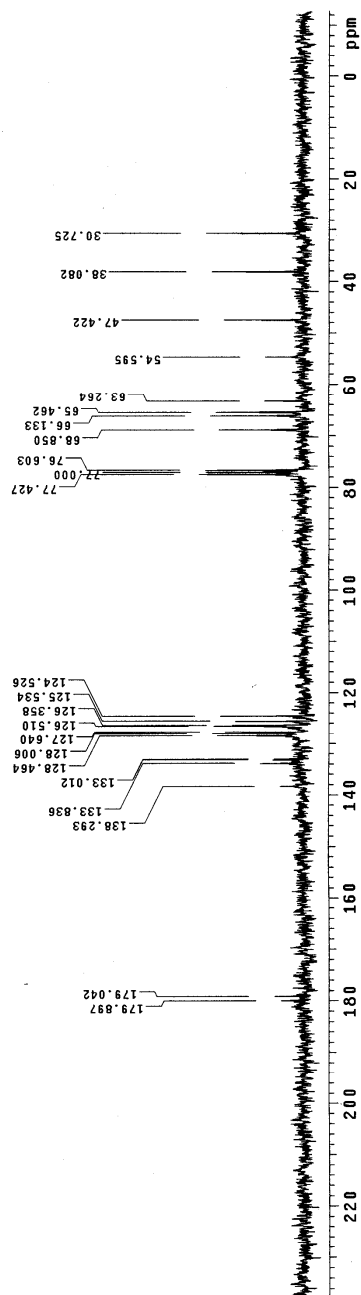

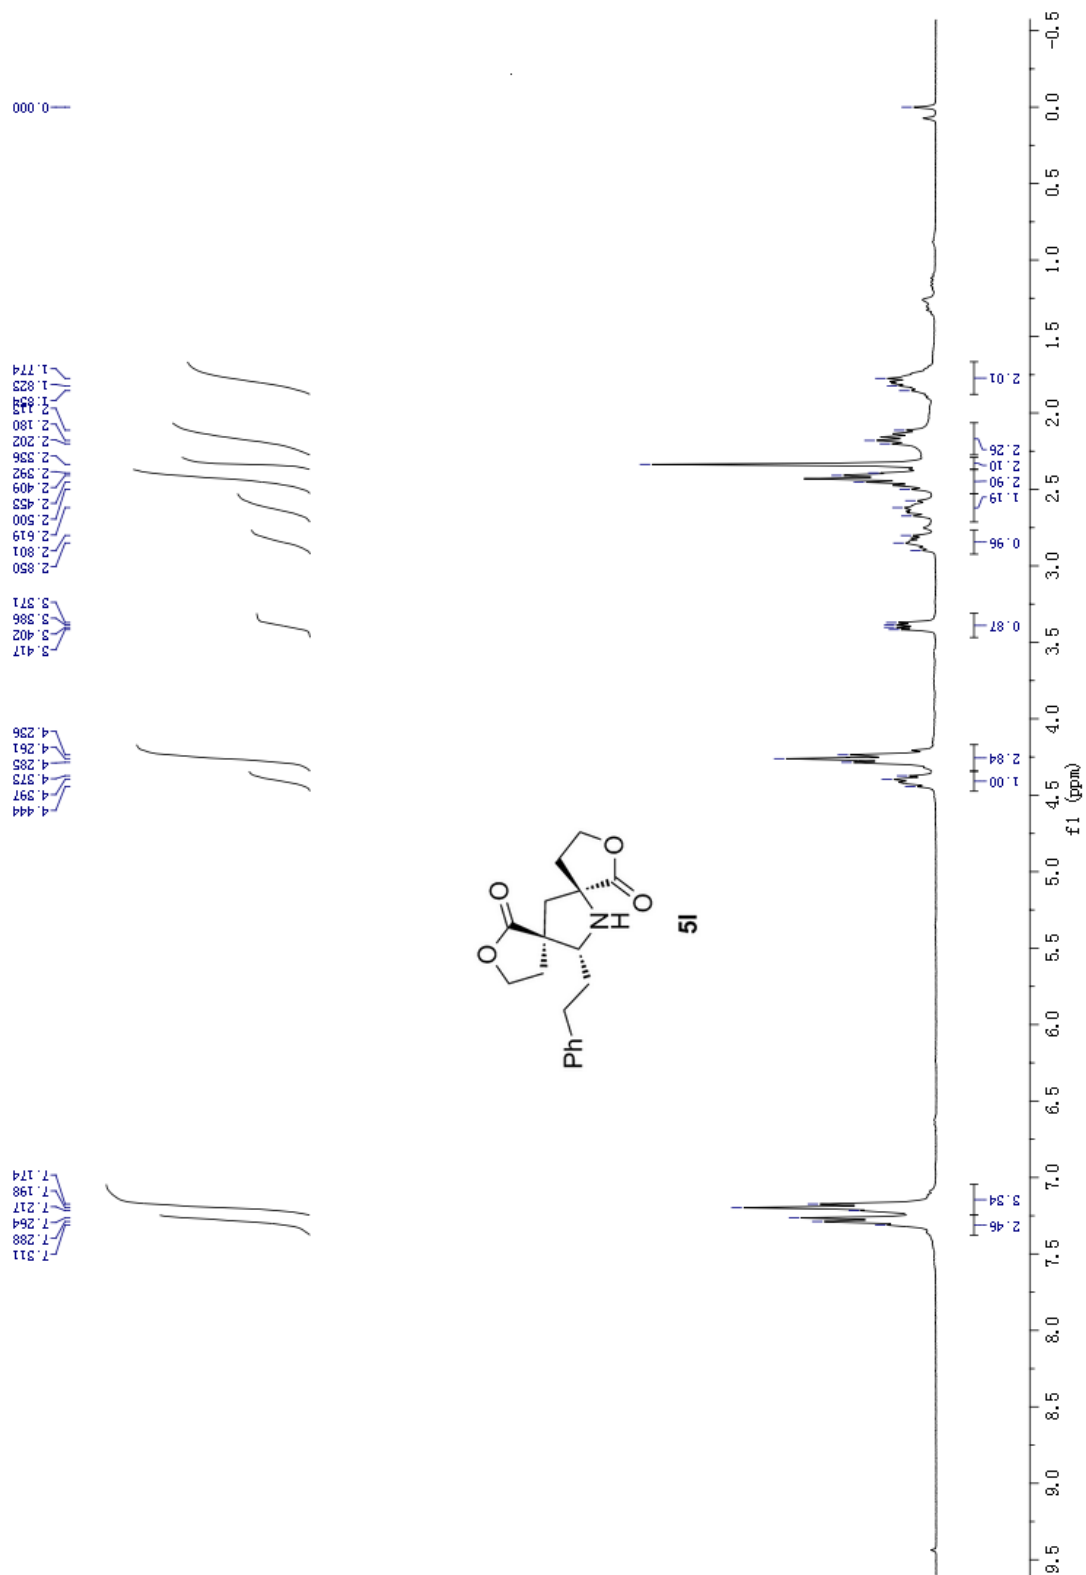

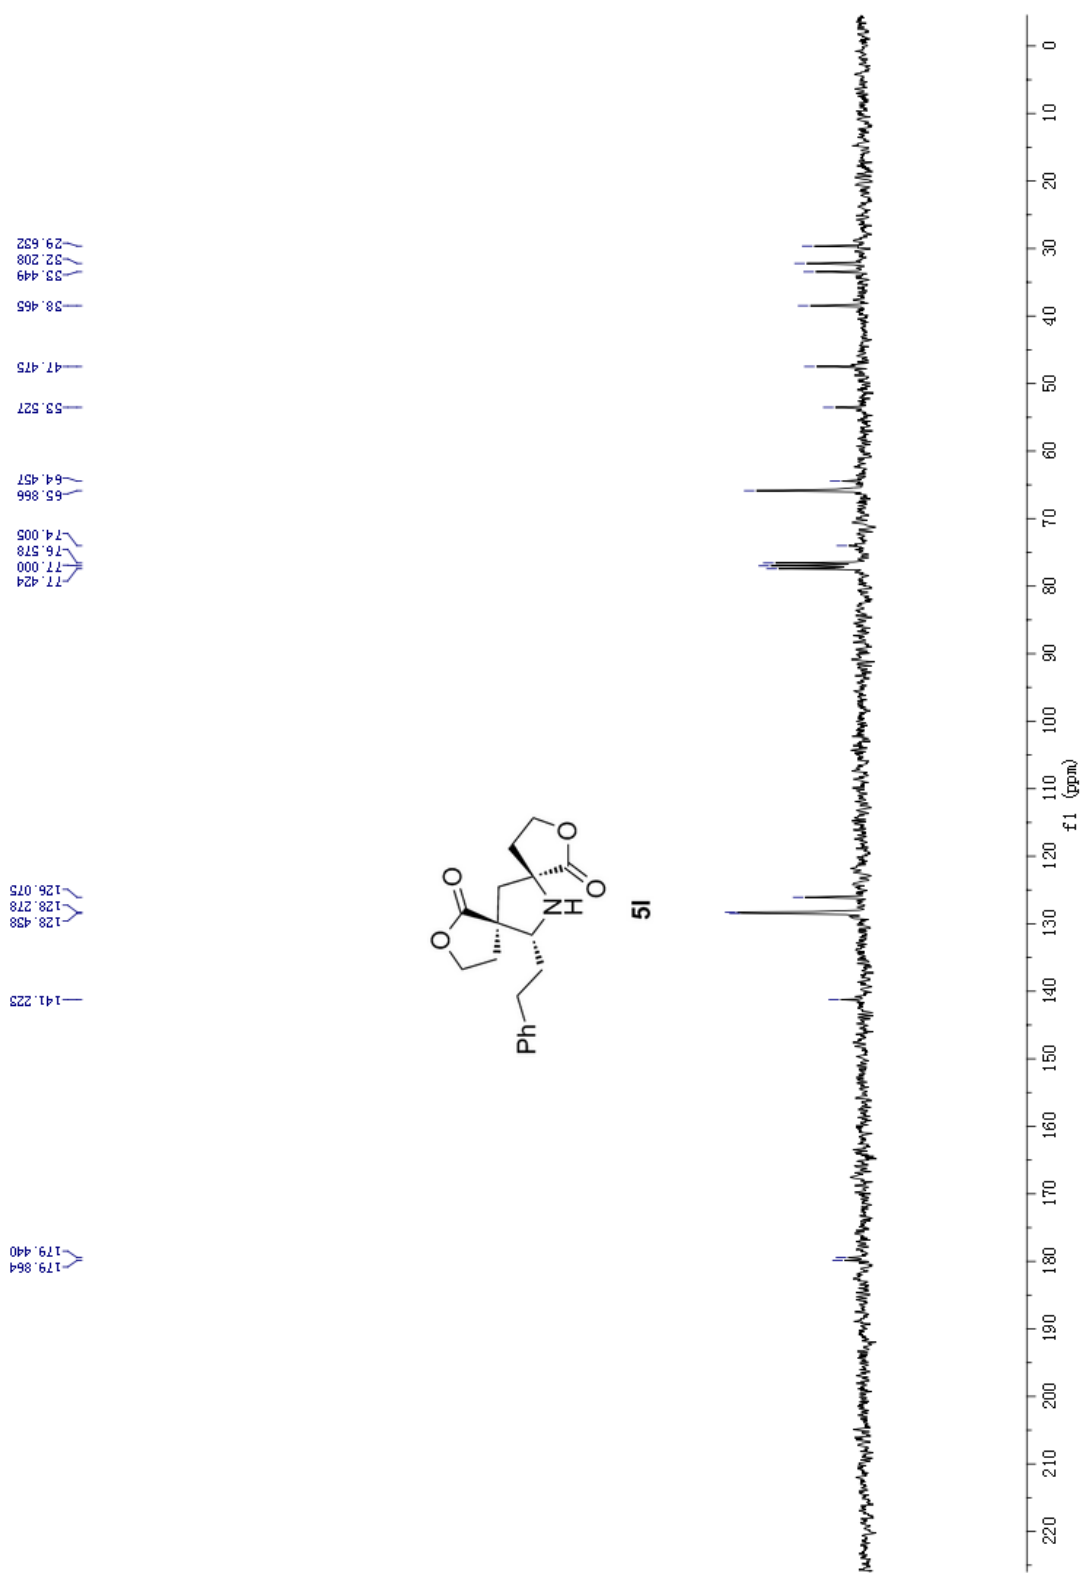

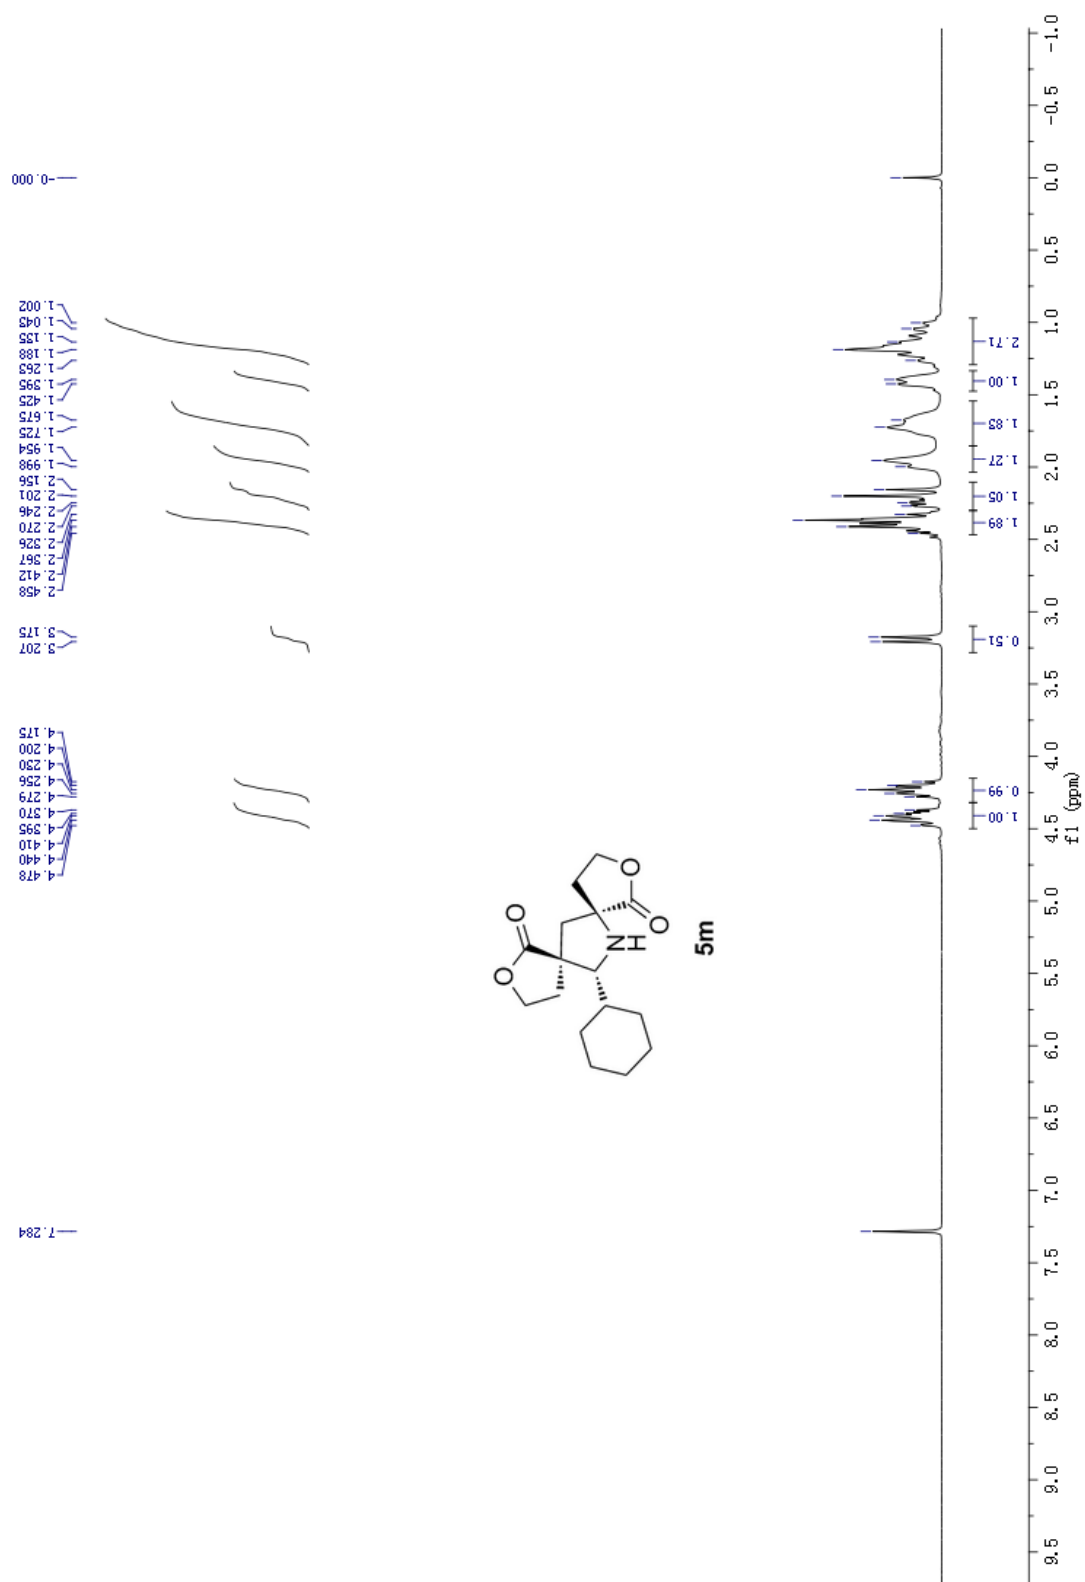

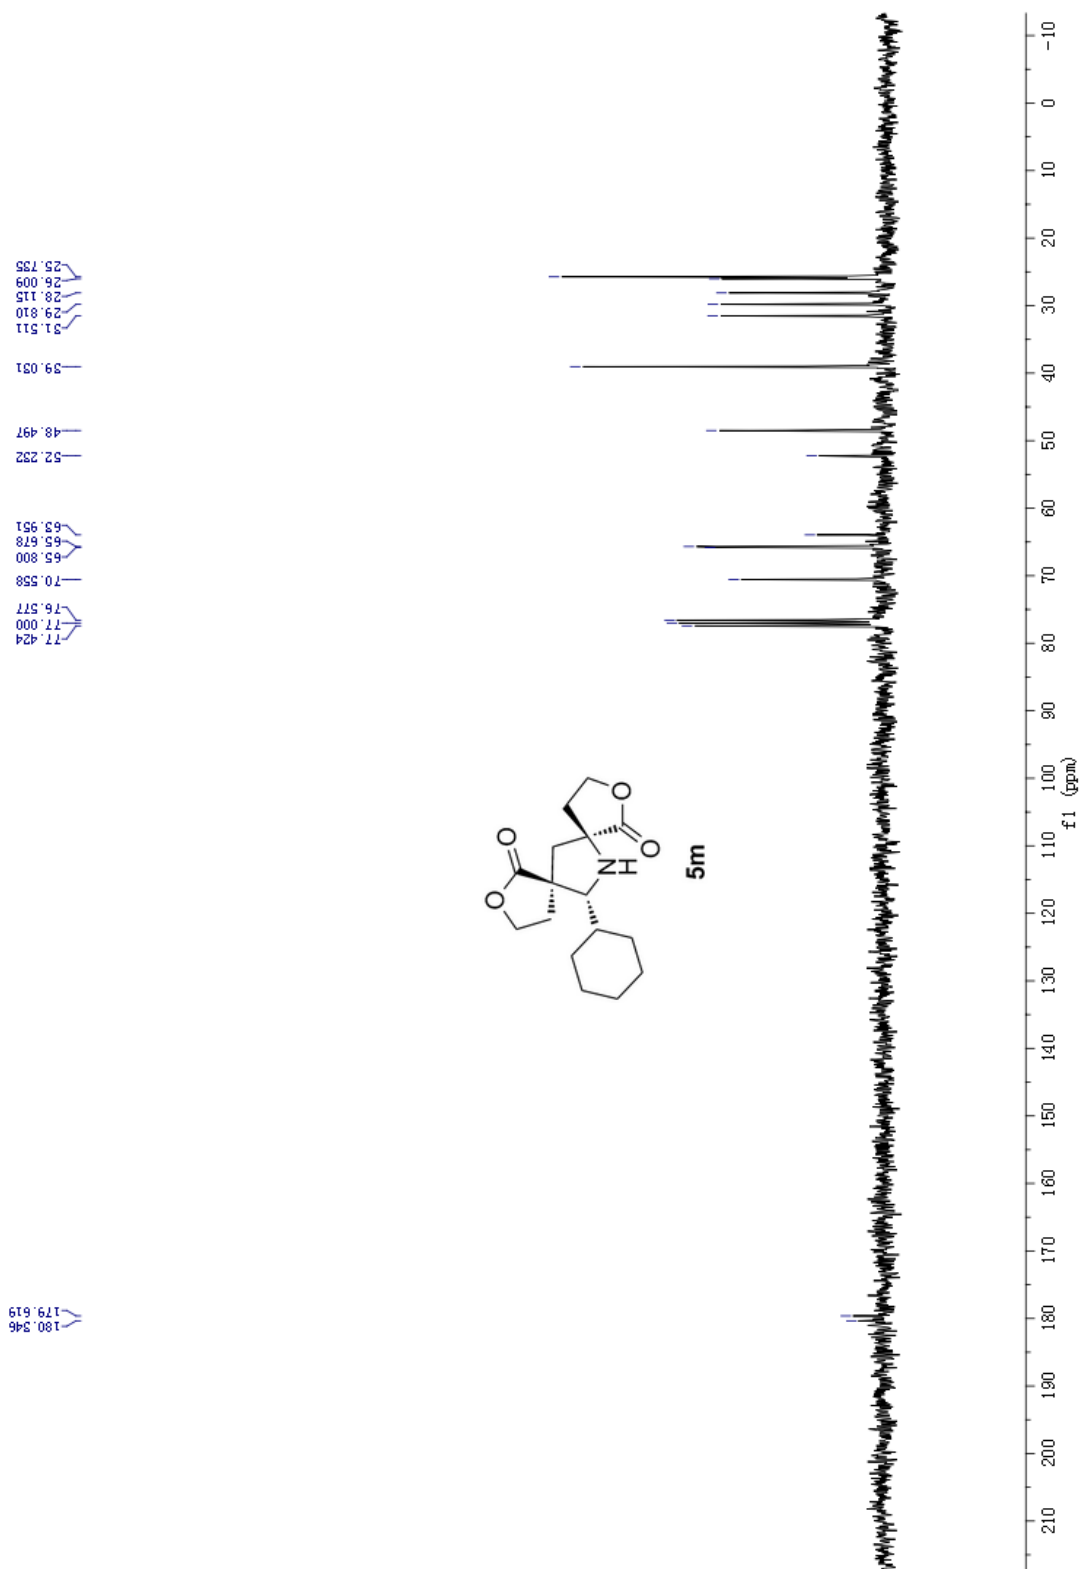

## IX. HPLC Chromatograms

Data File D:\LC\201111\LTL\LTL-12-79\LTL-12-79 2011-11-15 10-02-07\064-0101.D  
Sample Name: LTL-12-79

```
=====
Acq. Operator   : LTL                               Seq. Line :    1
Acq. Instrument : Instrument 1                       Location  : Vial 64
Injection Date  : 11/15/2011 10:03:32 AM           Inj       :    1
                                                    Inj Volume: 5 µl

Acq. Method     : D:\LC\201111\LTL\LTL-10-79\LTL-12-79 2011-11-15 10-02-07\ASH-30-70-1ML-
220NM.M
Last changed    : 11/15/2011 10:32:41 AM by LTL
                  (modified after loading)
Analysis Method : D:\LC\201111\LTL\LTL-12-79\LTL-12-79 2011-11-15 10-02-07\064-0101.D\DA.M (
ASH-30-70-1ML-220NM.M)
Last changed    : 11/17/2011 5:03:20 PM by hzl
                  (modified after loading)
=====
```

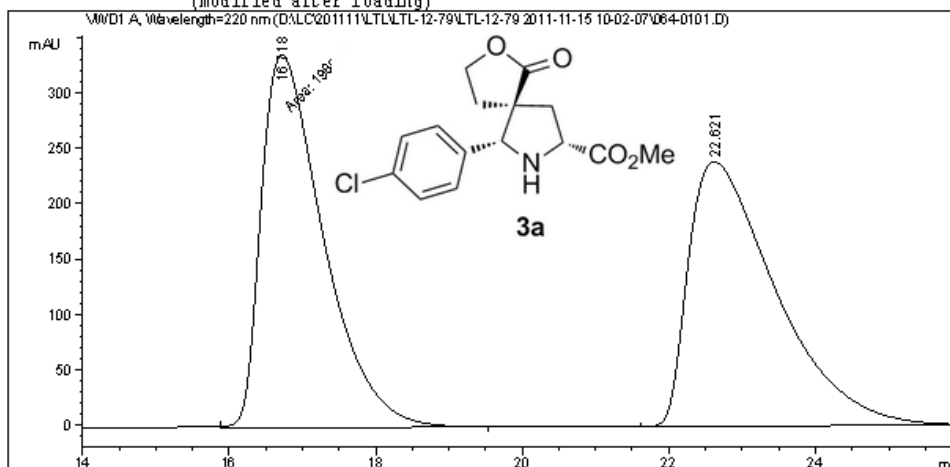

### Area Percent Report

```
Sorted By      : Signal
Multiplier     : 1.0000
Dilution       : 1.0000
Use Multiplier & Dilution Factor with ISTDs
```

Signal 1: VWD1 A, Wavelength=220 nm

| Peak # | RetTime [min] | Type | Width [min] | Area mAU  | Height [mAU] | Area %  |
|--------|---------------|------|-------------|-----------|--------------|---------|
| 1      | 16.718        | FM   | 0.9825      | 1.98646e4 | 336.95798    | 50.0581 |
| 2      | 22.621        | BB   | 1.2675      | 1.98185e4 | 238.95557    | 49.9419 |

Totals : 3.96832e4 575.91354

\*\*\* End of Report \*\*\*

Instrument 1 11/17/2011 5:03:25 PM hzl

Page 1 of 1



Data File D:\LC\201111\LTL\LTL-13-5\LTL-13-5 2011-11-18 11-15-42\094-0101.D  
Sample Name: LTL-13-5

```
=====
Acq. Operator   : LTL                               Seq. Line :    1
Acq. Instrument : Instrument 1                       Location  : Vial 94
Injection Date  : 11/18/2011 11:17:30 AM           Inj       :    1
                                                    Inj Volume: 5 µl
Acq. Method     : D:\LC\201111\LTL\LTL-13-5\LTL-13-5 2011-11-18 11-15-42\ASH-30-70-1ML-
                220NM-30MIN.M
Last changed    : 11/18/2011 11:14:39 AM by hzl
Analysis Method : D:\LC\201111\LTL\LTL-13-5\LTL-13-5 2011-11-18 11-15-42\094-0101.D\DA.M (
                ASH-30-70-1ML-220NM-30MIN.M)
Last changed    : 11/18/2011 12:25:11 PM by hzl
                (modified after loading)
=====
```

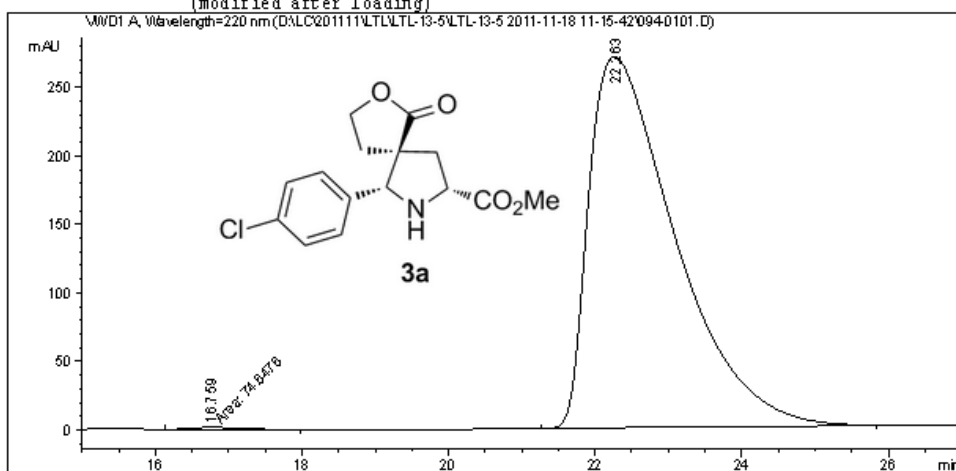

=====  
Area Percent Report  
=====

Sorted By : Signal  
Multiplier : 1.0000  
Dilution : 1.0000  
Use Multiplier & Dilution Factor with ISTDs

Signal 1: VMD1 A, Wavelength=220 nm

| Peak # | RetTime [min] | Type | Width [min] | Area mAU  | Area %  | Height [mAU] | Area %  |
|--------|---------------|------|-------------|-----------|---------|--------------|---------|
| 1      | 16.759        | MM   | 0.7869      | 74.64757  | 0.3354  | 1.58113      | 0.3354  |
| 2      | 22.263        | BB   | 1.2419      | 2.21823e4 | 99.6646 | 270.96863    | 99.6646 |

Totals :                                   2.22569e4   272.54976

=====  
\*\*\* End of Report \*\*\*

Instrument 1 11/18/2011 12:25:17 PM hzl

Page 1 of 1

Data File D:\LC\DATA\LQH\LQH-5-126-128\LQH-5-126-128 2013-04-28 09-50-59\092-0201.D  
Sample Name: LQH-5-126

```
=====
Acq. Operator   : CX                               Seq. Line :    2
Acq. Instrument : Instrument 1                     Location  : Vial 92
Injection Date  : 4/28/2013 10:03:25 AM          Inj       :    1
                                                    Inj Volume: 5 µl
Acq. Method     : D:\LC\DATA\LQH\LQH-5-126-128\LQH-5-126-128 2013-04-28 09-50-59\ADH-30-70-
10ML-220NM.M
Last changed    : 4/28/2013 10:17:23 AM by CX
(modified after loading)
Analysis Method : D:\LC\DATA\LQH\LQH-5-126-128\LQH-5-126-128 2013-04-28 09-50-59\092-0201.D\
D.A.M (ADH-30-70-10ML-220NM.M)
Last changed    : 4/28/2013 11:10:53 AM by CX
(modified after loading)
=====
```

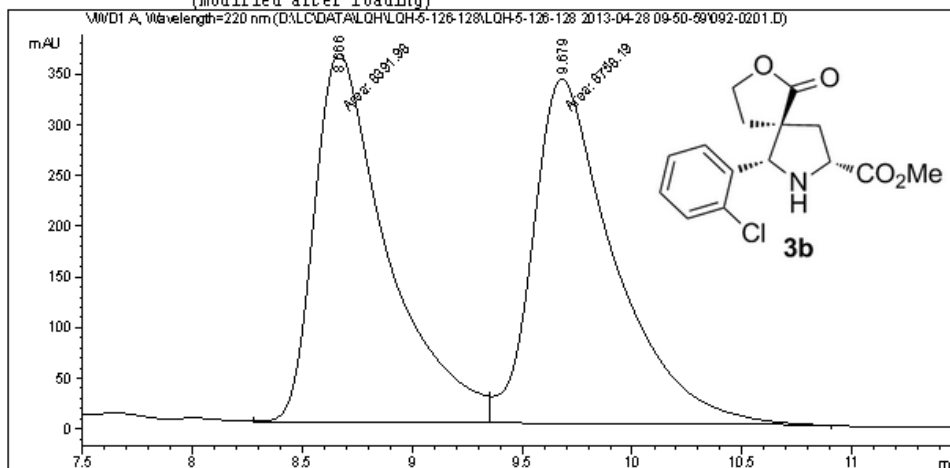

=====  
Area Percent Report  
=====

Sorted By : Signal  
Multiplier : 1.0000  
Dilution : 1.0000  
Use Multiplier & Dilution Factor with ISTDs

Signal 1: VWD1 A, Wavelength=220 nm

| Peak # | RetTime [min] | Type | Width [min] | Area mAU   | Height [mAU] | Area %  |
|--------|---------------|------|-------------|------------|--------------|---------|
| 1      | 8.666         | MF   | 0.3847      | 8391.97559 | 363.57651    | 48.9323 |
| 2      | 9.679         | FM   | 0.4296      | 8758.19141 | 339.78110    | 51.0677 |

Totals : 1.71502e4 703.35760

=====  
\*\*\* End of Report \*\*\*

Instrument 1 4/28/2013 11:11:09 AM CX

Page 1 of 1

Data File D:\LC\DATA\LQH\LQH-5-126-128\LQH-5-126-128 2013-04-28 09-50-59\093-0301.D  
Sample Name: LQH-5-128A

```
=====
Acq. Operator   : CX                               Seq. Line :    3
Acq. Instrument : Instrument 1                     Location  : Vial 93
Injection Date  : 4/28/2013 10:20:29 AM           Inj       :    1
                                                    Inj Volume: 5 µl
Acq. Method     : D:\LC\DATA\LQH\LQH-5-126-128\LQH-5-126-128 2013-04-28 09-50-59\ADH-30-70-
10ML-220NM.M
Last changed    : 4/28/2013 10:18:44 AM by CX
(modified after loading)
Analysis Method : D:\LC\DATA\LQH\LQH-5-126-128\LQH-5-126-128 2013-04-28 09-50-59\093-0301.D\
D.A.M (ADH-30-70-10ML-220NM.M)
Last changed    : 4/28/2013 11:12:48 AM by CX
(modified after loading)
=====
```

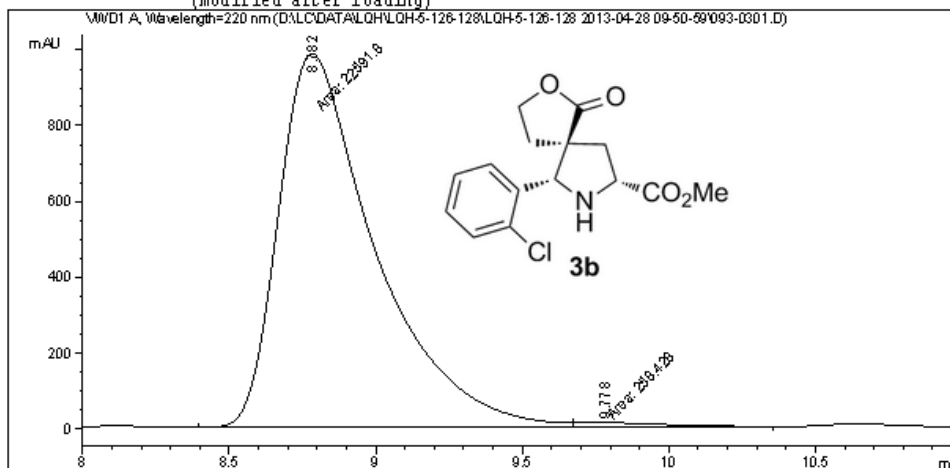

=====  
Area Percent Report  
=====

Sorted By : Signal  
Multiplier : 1.0000  
Dilution : 1.0000  
Use Multiplier & Dilution Factor with ISTDs

Signal 1: VWD1 A, Wavelength=220 nm

| Peak # | RetTime [min] | Type | Width [min] | Area mAU  | Height [mAU] | Area %  |
|--------|---------------|------|-------------|-----------|--------------|---------|
| 1      | 8.782         | MM   | 0.3812      | 2.25918e4 | 987.80975    | 98.8690 |
| 2      | 9.778         | MM   | 0.3674      | 258.42834 | 11.72447     | 1.1310  |

Totals : 2.28503e4 999.53422

=====  
\*\*\* End of Report \*\*\*

Instrument 1 4/28/2013 11:12:58 AM CX

Page 1 of 1

Data File D:\LC\201111\LQH\LQH-5-123\LQH-5-123A 2011-11-26 10-28-14\094-0201.D  
Sample Name: LQH-5-121C

```
=====
Acq. Operator   : lqh                               Seq. Line :    2
Acq. Instrument : Instrument 1                       Location  : Vial 94
Injection Date  : 11/26/2011 10:52:07 AM           Inj       :    1
                                                    Inj Volume: 5 µl
Acq. Method     : D:\LC\201111\LQH\LQH-5-123\LQH-5-123A 2011-11-26 10-28-14\ASH-30-70-IML-
                220MM.M
Last changed    : 11/26/2011 11:17:44 AM by lqh
                (modified after loading)
Analysis Method : D:\LC\201111\LQH\LQH-5-123\LQH-5-123A 2011-11-26 10-28-14\094-0201.D\DA.M
                (ASH-30-70-IML-220MM.M)
Last changed    : 11/26/2011 11:54:36 AM by HZL
                (modified after loading)
=====
```

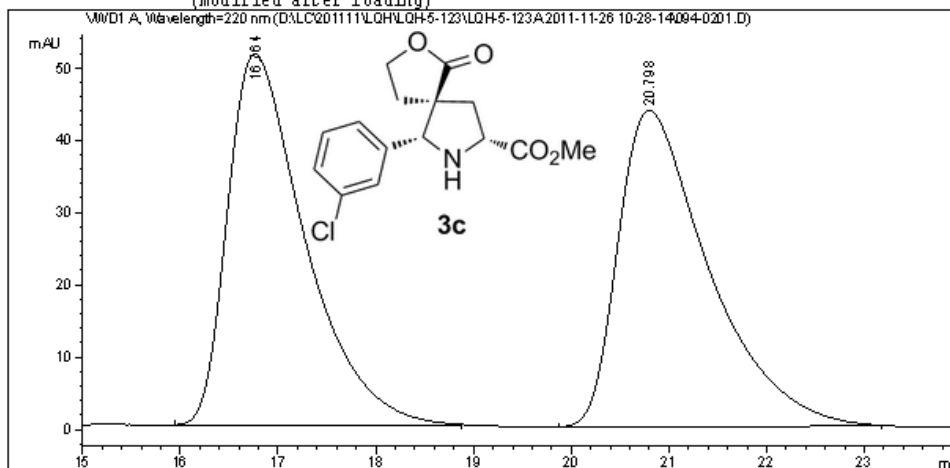

=====  
Area Percent Report  
=====

```
Sorted By      : Signal
Multiplier     : 1.0000
Dilution       : 1.0000
Use Multiplier & Dilution Factor with ISTDs
```

Signal 1: VWD1 A, Wavelength=220 nm

| Peak # | RetTime [min] | Type | Width [min] | Area mAU   | Height [mAU] | Area %  |
|--------|---------------|------|-------------|------------|--------------|---------|
| 1      | 16.764        | BB   | 0.8189      | 2822.21997 | 51.34835     | 49.9686 |
| 2      | 20.798        | BB   | 0.9425      | 2825.76660 | 43.76609     | 50.0314 |

Totals : 5647.98657 95.11444

=====  
\*\*\* End of Report \*\*\*

Instrument 1 11/26/2011 11:54:41 AM HZL

Page 1 of 1

Data File D:\LC\201111\LQH\LQH-5-124\LQH-5-124 2011-11-28 21-46-14\054-0501.D  
Sample Name: LQH-5-124C

```
=====
Acq. Operator   : LQH                               Seq. Line :    5
Acq. Instrument : Instrument 1                       Location  : Vial 54
Injection Date  : 11/28/2011 11:48:24 PM           Inj       :    1
                                                    Inj Volume: 5 µl

Acq. Method     : D:\LC\201111\LQH\LQH-5-124\LQH-5-124 2011-11-28 21-46-14\ASH-30-70-10ML-
220NM-35MIN.M
Last changed    : 11/28/2011 9:40:40 PM by tmc
Analysis Method : D:\LC\201111\LQH\LQH-5-124\LQH-5-124 2011-11-28 21-46-14\054-0501.D\DA.M (
ASH-30-70-10ML-220NM-35MIN.M)
Last changed    : 11/29/2011 12:00:08 PM by tmc
(modified after loading)
=====
```

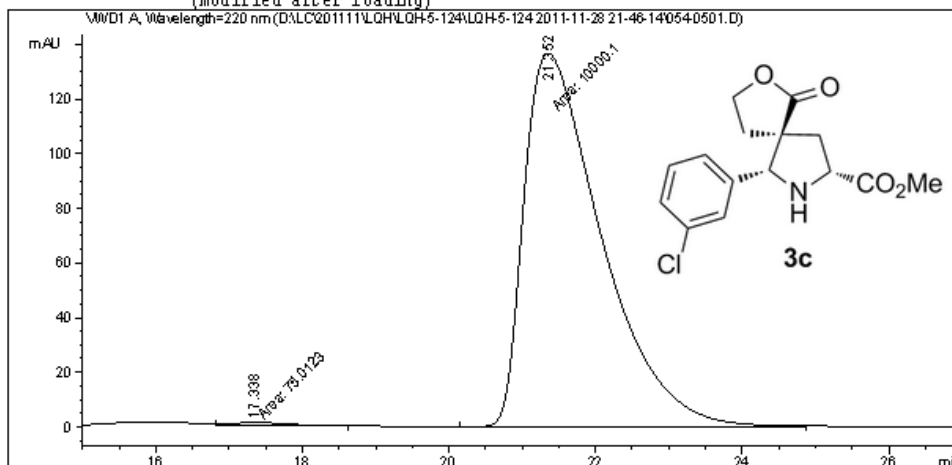

=====  
Area Percent Report  
=====

Sorted By : Signal  
Multiplier : 1.0000  
Dilution : 1.0000  
Use Multiplier & Dilution Factor with ISTDs

Signal 1: VWD1 A, Wavelength=220 nm

| Peak # | RetTime [min] | Type | Width [min] | Area mAU  | Area %  | Height [mAU] | Area %  |
|--------|---------------|------|-------------|-----------|---------|--------------|---------|
| 1      | 17.338        | PM   | 0.9675      | 75.01229  | 0.7445  | 1.29223      | 0.7445  |
| 2      | 21.352        | MM   | 1.2204      | 1.00001e4 | 99.2555 | 136.56596    | 99.2555 |

Totals : 1.00751e4 137.85819

=====  
\*\*\* End of Report \*\*\*

Data File D:\LC\201111\LQH\LQH-5-117\LQH-5-117 2011-11-23 08-40-38\083-0301.D  
Sample Name: LQH-5-117C

```
=====
Acq. Operator   : LQH                      Seq. Line :    3
Acq. Instrument : Instrument 1              Location  : Vial 83
Injection Date  : 11/23/2011 10:11:32 AM   Inj       :    1
                                           Inj Volume: 5 µl
Acq. Method     : D:\LC\201111\LQH\LQH-5-117\LQH-5-117 2011-11-23 08-40-38\ASH-30-70-1ML-
220NM.M
Last changed    : 11/23/2011 10:40:09 AM by LQH
                 (modified after loading)
Analysis Method : D:\LC\201111\LQH\LQH-5-117\LQH-5-117 2011-11-23 08-40-38\083-0301.D\DA.M (
ASH-30-70-1ML-220NM.M)
Last changed    : 11/26/2011 11:40:24 AM by HZL
                 (modified after loading)
=====
```

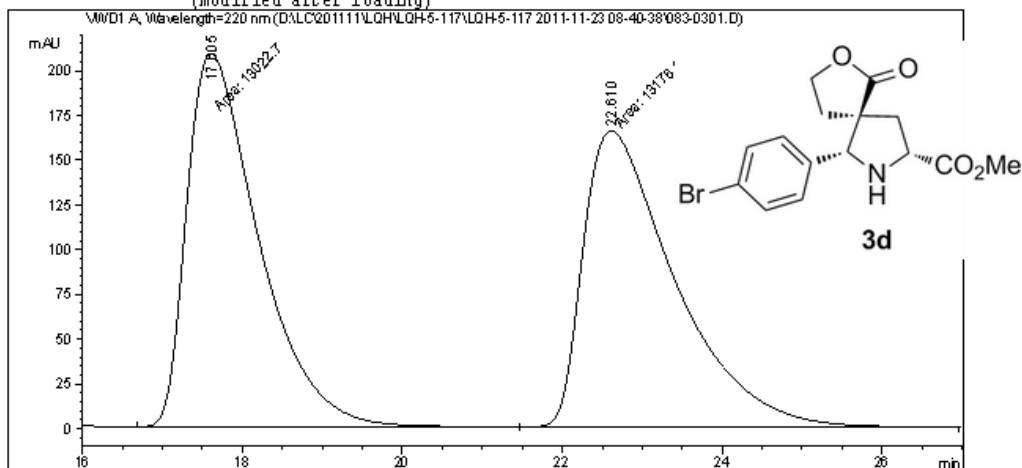

=====  
Area Percent Report  
=====

Sorted By : Signal  
Multiplier : 1.0000  
Dilution : 1.0000  
Use Multiplier & Dilution Factor with ISTDs

Signal 1: VWD1 A, Wavelength=220 nm

| Peak # | RetTime [min] | Type | Width [min] | Area mAU  | Height [mAU] | Area %  |
|--------|---------------|------|-------------|-----------|--------------|---------|
| 1      | 17.605        | MF   | 1.0402      | 1.30227e4 | 208.65845    | 49.7067 |
| 2      | 22.610        | FM   | 1.3266      | 1.31764e4 | 165.53917    | 50.2933 |

Totals : 2.61991e4 374.19762

=====  
\*\*\* End of Report \*\*\*

Instrument 1 11/26/2011 11:40:29 AM HZL

Page 1 of 1

Data File D:\LC\201111\LQH\LQH-5-121\LQH-5-121AC 2011-11-24 20-38-40\093-0301.D  
 Sample Name: LQH-5-121B

```

=====
Acq. Operator   : LQH                               Seq. Line :    3
Acq. Instrument : Instrument 1                       Location  : Vial 93
Injection Date  : 11/24/2011 9:22:45 PM             Inj       :    1
                                                    Inj Volume: 5 µl
Acq. Method     : D:\LC\201111\LQH\LQH-5-121\LQH-5-121AC 2011-11-24 20-38-40\ASH-30-70-10ML-
                220NM-30MIN.M
Last changed    : 11/24/2011 8:37:08 PM by HZL
Analysis Method : D:\LC\201111\LQH\LQH-5-121\LQH-5-121AC 2011-11-24 20-38-40\093-0301.D\DA.M
                (ASH-30-70-10ML-220NM-30MIN.M)
Last changed    : 11/26/2011 12:00:52 PM by HZL
                (modified after loading)
    
```

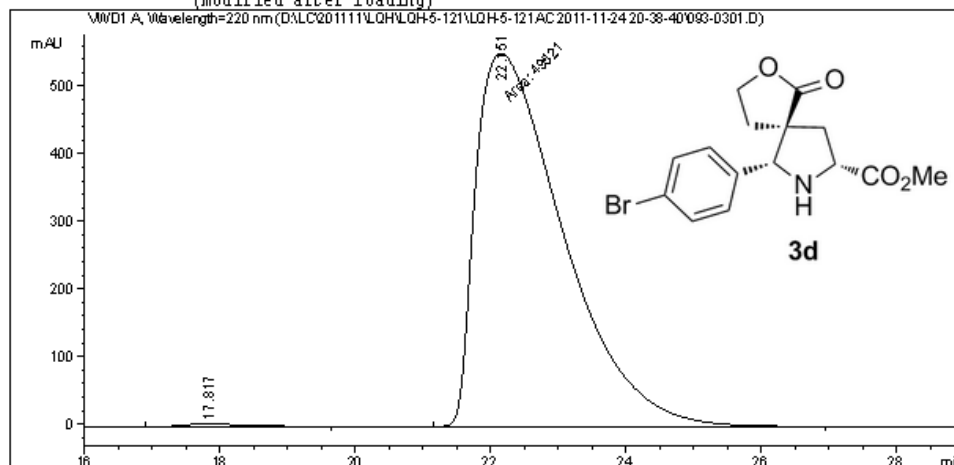

=====  
 Area Percent Report  
 =====

```

Sorted By      :      Signal
Multiplier     :      1.0000
Dilution       :      1.0000
Use Multiplier & Dilution Factor with ISTDs
    
```

Signal 1: VWD1 A, Wavelength=220 nm

| Peak # | RetTime [min] | Type | Width [min] | Area mAU  | Area %  | Height [mAU] |
|--------|---------------|------|-------------|-----------|---------|--------------|
| 1      | 17.817        | VB   | 0.7971      | 232.72244 | 0.4677  | 3.94681      |
| 2      | 22.151        | MM   | 1.4960      | 4.95210e4 | 99.5323 | 551.71362    |

Totals :                                      4.97537e4    555.66043

=====  
 \*\*\* End of Report \*\*\*

Data File D:\LC\201111\LQH\LQH-5-121\LQH-5-121 2011-11-26 09-44-00\092-0201.D  
 Sample Name: LQH-5-121A

```

=====
Acq. Operator   : lqh                               Seq. Line :    2
Acq. Instrument : Instrument 1                       Location  : Vial 92
Injection Date  : 11/26/2011 9:56:31 AM            Inj       :    1
                                                    Inj Volume: 5 µl

Acq. Method     : D:\LC\201111\LQH\LQH-5-121\LQH-5-121 2011-11-26 09-44-00\ASH-30-70-1ML-
                220NM.M
Last changed    : 11/26/2011 10:25:37 AM by lqh
                (modified after loading)
Analysis Method : D:\LC\201111\LQH\LQH-5-121\LQH-5-121 2011-11-26 09-44-00\092-0201.D\DA.M (
                ASH-30-70-1ML-220NM.M)
Last changed    : 11/26/2011 11:44:26 AM by HZL
                (modified after loading)
    
```

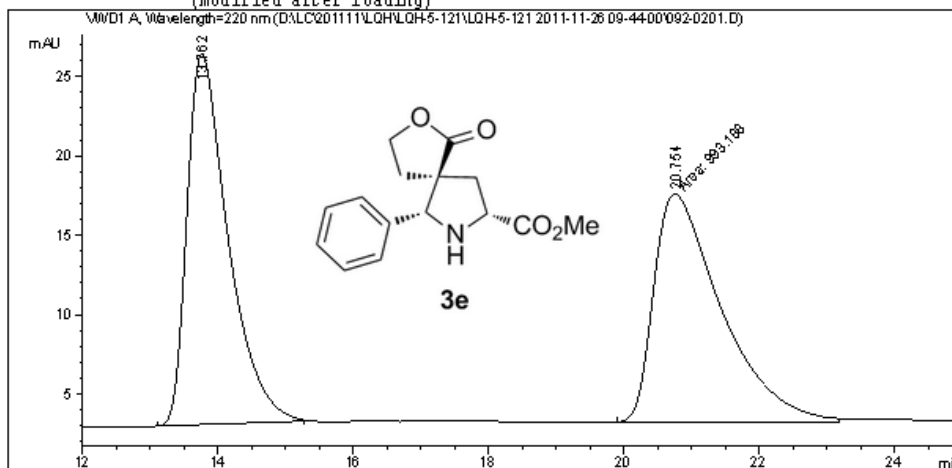

Area Percent Report

```

=====
Sorted By      : Signal
Multiplier     : 1.0000
Dilution      : 1.0000
Use Multiplier & Dilution Factor with ISTDs
    
```

Signal 1: VWD1 A, Wavelength=220 nm

| Peak # | RetTime [min] | Type | Width [min] | Area mAU  | Height [mAU] | Area %  |
|--------|---------------|------|-------------|-----------|--------------|---------|
| 1      | 13.762        | BB   | 0.6291      | 986.78485 | 23.38632     | 49.8383 |
| 2      | 20.754        | MM   | 1.1520      | 993.18842 | 14.36943     | 50.1617 |

Totals : 1979.97327 37.75576

\*\*\* End of Report \*\*\*

Instrument 1 11/26/2011 11:44:31 AM HZL

Page 1 of 1



Data File D:\LC\201111\LQH\LQH-5-124\LQH-5-124 2011-11-28 21-46-14\052-0301.D  
Sample Name: LQH-5-124A

```
=====
Acq. Operator   : LQH                               Seq. Line :    3
Acq. Instrument : Instrument 1                       Location  : Vial 52
Injection Date  : 11/28/2011 10:35:13 PM           Inj       :    1
                                                    Inj Volume: 5 µl

Acq. Method     : D:\LC\201111\LQH\LQH-5-124\LQH-5-124 2011-11-28 21-46-14\ASH-30-70-10ML-
                220NM-35MIN.M
Last changed    : 11/28/2011 9:40:40 PM by tmc
Analysis Method : D:\LC\201111\LQH\LQH-5-124\LQH-5-124 2011-11-28 21-46-14\052-0301.D\DA.M (
                ASH-30-70-10ML-220NM-35MIN.M)
Last changed    : 11/29/2011 8:38:54 AM by tmc
                (modified after loading)
=====
```

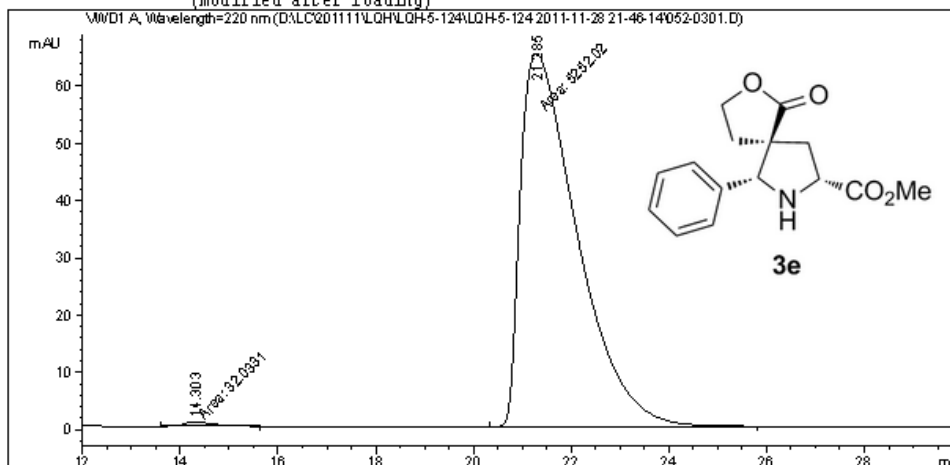

=====  
Area Percent Report  
=====

Sorted By : Signal  
Multiplier : 1.0000  
Dilution : 1.0000  
Use Multiplier & Dilution Factor with ISTDs

Signal 1: VMD1 A, Wavelength=220 nm

| Peak # | RetTime [min] | Type | Width [min] | Area mAU   | Area %  | Height [mAU] | Area %  |
|--------|---------------|------|-------------|------------|---------|--------------|---------|
| 1      | 14.303        | MM   | 0.7022      | 32.03307   | 0.6062  | 7.60255e-1   | 0.6062  |
| 2      | 21.285        | MM   | 1.3427      | 5252.01660 | 99.3938 | 65.19064     | 99.3938 |

Totals : 5284.04967 65.95090

=====  
\*\*\* End of Report \*\*\*

Instrument 1 11/29/2011 8:39:00 AM tmc

Page 1 of 1

Data File D:\LC\201111\LQH\LQH-5-117\LQH-5-117 2011-11-23 08-40-38\081-0101.D  
Sample Name: LQH-5-117A

```
=====
Acq. Operator   : LQH                               Seq. Line :    1
Acq. Instrument : Instrument 1                       Location  : Vial 81
Injection Date  : 11/23/2011 8:41:49 AM             Inj       :    1
                                                    Inj Volume: 5 µl
Acq. Method     : D:\LC\201111\LQH\LQH-5-117\LQH-5-117 2011-11-23 08-40-38\ASH-30-70-1ML-
                220NM.M
Last changed    : 11/23/2011 9:12:32 AM by LQH
                (modified after loading)
Analysis Method : D:\LC\201111\LQH\LQH-5-117\LQH-5-117 2011-11-23 08-40-38\081-0101.D\DA.M (
                ASH-30-70-1ML-220NM.M)
Last changed    : 11/26/2011 11:37:18 AM by HZL
                (modified after loading)
=====
```

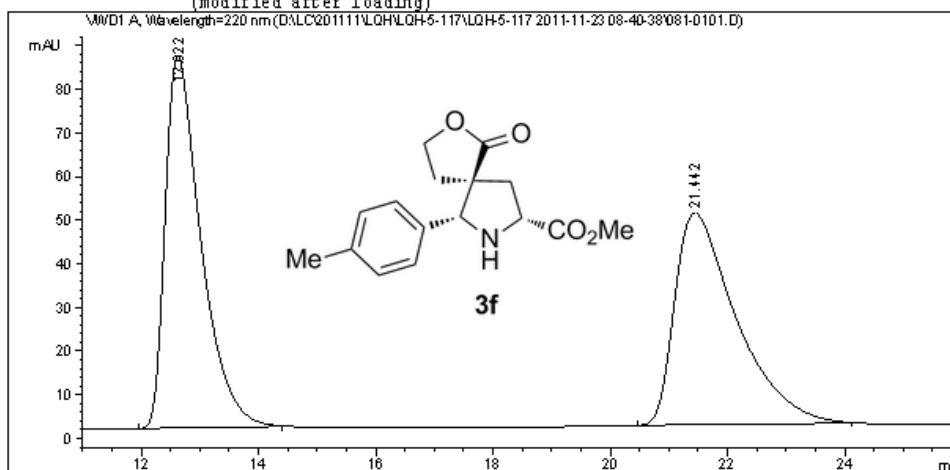

=====  
Area Percent Report  
=====

Sorted By : Signal  
Multiplier : 1.0000  
Dilution : 1.0000  
Use Multiplier & Dilution Factor with ISTDs

Signal 1: VWD1 A, Wavelength=220 nm

| Peak # | RetTime [min] | Type | Width [min] | Area mAU   | Height [mAU] | Area %  |
|--------|---------------|------|-------------|------------|--------------|---------|
| 1      | 12.622        | BB   | 0.6332      | 3607.51807 | 85.30511     | 50.4197 |
| 2      | 21.442        | BB   | 1.0646      | 3547.45557 | 48.57446     | 49.5803 |

Totals : 7154.97363 133.87958

=====  
\*\*\* End of Report \*\*\*

Instrument 1 11/26/2011 11:37:24 AM HZL

Page 1 of 1

Data File D:\LC\201111\LQH\LQH-5-121\LQH-5-121AC 2011-11-24 20-38-40\092-0201.D  
 Sample Name: LQH-5-121A

```

=====
Acq. Operator   : LQH                               Seq. Line :    2
Acq. Instrument : Instrument 1                       Location  : Vial 92
Injection Date  : 11/24/2011 8:51:00 PM             Inj       :    1
                                                    Inj Volume: 5 µl
Acq. Method     : D:\LC\201111\LQH\LQH-5-121\LQH-5-121AC 2011-11-24 20-38-40\ASH-30-70-10ML-
                220NM-30MIN.M
Last changed    : 11/24/2011 8:37:08 PM by HZL
Analysis Method : D:\LC\201111\LQH\LQH-5-121\LQH-5-121AC 2011-11-24 20-38-40\092-0201.D\DA.M
                (ASH-30-70-10ML-220NM-30MIN.M)
Last changed    : 11/26/2011 11:57:52 AM by HZL
                (modified after loading)
    
```

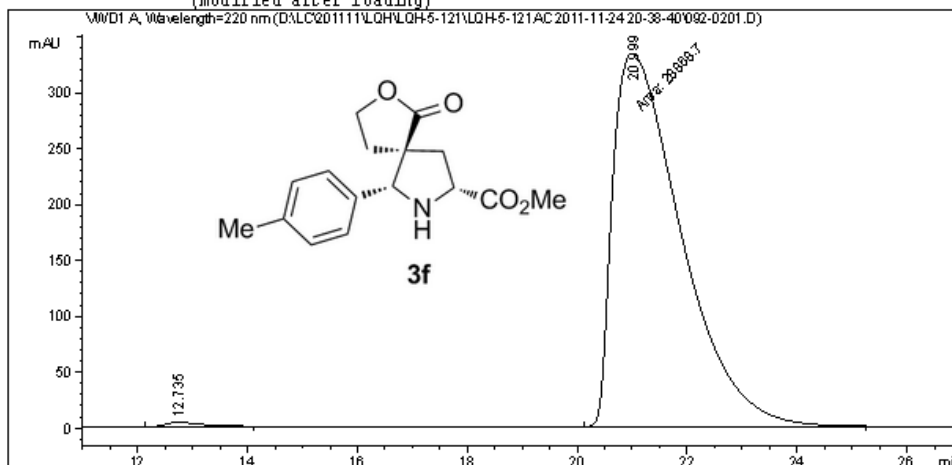

=====  
 Area Percent Report  
 =====

```

Sorted By      :      Signal
Multiplier     :      1.0000
Dilution       :      1.0000
Use Multiplier & Dilution Factor with ISTDs
    
```

Signal 1: VMD1 A, Wavelength=220 nm

| Peak # | RetTime [min] | Type | Width [min] | Area mAU  | Area %  | Height [mAU] |
|--------|---------------|------|-------------|-----------|---------|--------------|
| 1      | 12.735        | BB   | 0.6512      | 180.80287 | 0.6224  | 3.90208      |
| 2      | 20.999        | MM   | 1.4402      | 2.88687e4 | 99.3776 | 334.07495    |

Totals :                      2.90495e4    337.97703

=====  
 \*\*\* End of Report \*\*\*

Data File D:\LC\201111\LQH\LQH-5-117\LQH-5-117D-ODH 2011-11-23 12-25-15\084-0201.D  
 Sample Name: LQH-5-117D-ODH

```

=====
Acq. Operator   : LQH                               Seq. Line :    2
Acq. Instrument : Instrument 1                       Location  : Vial 84
Injection Date  : 11/23/2011 12:37:38 PM            Inj       :    1
                                                    Inj Volume: 5 µl

Acq. Method     : D:\LC\201111\LQH\LQH-5-117\LQH-5-117D-ODH 2011-11-23 12-25-15\ODH-20-80-
10ML-220MM.M
Last changed    : 11/23/2011 12:24:25 PM by hzl
Analysis Method : D:\LC\201111\LQH\LQH-5-117\LQH-5-117D-ODH 2011-11-23 12-25-15\084-0201.D\
D.A.M (ODH-20-80-10ML-220MM.M)
Last changed    : 11/26/2011 11:41:48 AM by HZL
                (modified after loading)
    
```

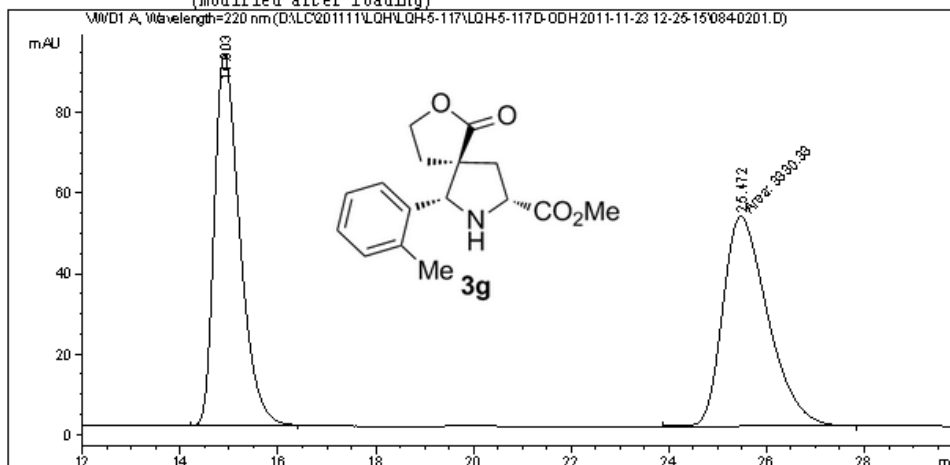

Area Percent Report

```

Sorted By      :      Signal
Multiplier     :      1.0000
Dilution       :      1.0000
Use Multiplier & Dilution Factor with ISTDs
    
```

Signal 1: VMD1 A, Wavelength=220 nm

| Peak # | RetTime [min] | Type | Width [min] | Area mAU   | Area %  | Height [mAU] | Area %  |
|--------|---------------|------|-------------|------------|---------|--------------|---------|
| 1      | 14.903        | BB   | 0.5536      | 3339.64868 | 50.0699 | 92.52085     | 50.0699 |
| 2      | 25.472        | MM   | 1.0647      | 3330.32690 | 49.9301 | 52.13207     | 49.9301 |

Totals : 6669.97559 144.65292

\*\*\* End of Report \*\*\*

Instrument 1 11/26/2011 11:41:53 AM HZL

Page 1 of 1

Data File D:\LC\201111\LQH\LQH-5-119\LQH-5-119D 2011-11-27 18-36-36\081-0201.D  
 Sample Name: LQH-5-119D

```

=====
Acq. Operator   : LQH                      Seq. Line :    2
Acq. Instrument : Instrument 1              Location  : Vial 81
Injection Date  : 11/27/2011 6:48:31 PM    Inj       :    1
                                           Inj Volume: 5 µl
Acq. Method     : D:\LC\201111\LQH\LQH-5-119\LQH-5-119D 2011-11-27 18-36-36\0DH-20-80-10ML-
220NM-35MIN.M
Last changed    : 11/27/2011 6:34:35 PM by LTL
Analysis Method : D:\LC\201111\LQH\LQH-5-119\LQH-5-119D 2011-11-27 18-36-36\081-0201.D\DA.M
(0DH-20-80-10ML-220NM-35MIN.M)
Last changed    : 12/1/2011 5:08:22 PM by LTL
(modified after loading)
    
```

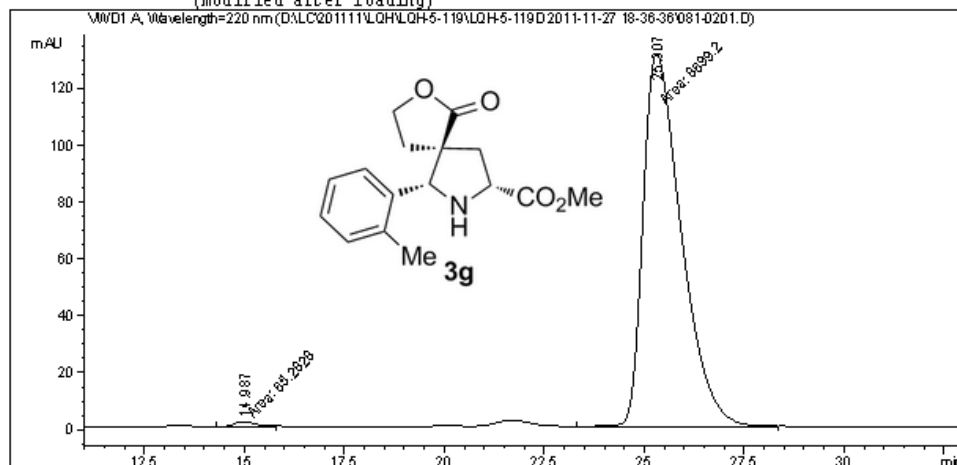

=====  
 Area Percent Report  
 =====

```

Sorted By       : Signal
Multiplier      : 1.0000
Dilution        : 1.0000
Use Multiplier & Dilution Factor with ISTDs
    
```

Signal 1: VMD1 A, Wavelength=220 nm

| Peak # | RetTime [min] | Type | Width [min] | Area mAU   | Area %  | Height [mAU] |
|--------|---------------|------|-------------|------------|---------|--------------|
| 1      | 14.987        | MF   | 0.6159      | 65.28275   | 0.7449  | 1.76669      |
| 2      | 25.307        | MF   | 1.1054      | 8699.19824 | 99.2551 | 131.15779    |

Totals : 8764.48100 132.92448

=====  
 \*\*\* End of Report \*\*\*

Instrument 1 12/1/2011 5:08:27 PM LTL

Page 1 of 1

Data File D:\LC\201111\LQH\LQH-5-123\LQH-5-123A 2011-11-26 10-28-14\095-0301.D  
Sample Name: LQH-5-121D

```
=====
Acq. Operator   : lqh                               Seq. Line :    3
Acq. Instrument : Instrument 1                       Location  : Vial 95
Injection Date  : 11/26/2011 11:19:34 AM           Inj       :    1
                                                    Inj Volume: 5 µl
Acq. Method     : D:\LC\201111\LQH\LQH-5-123\LQH-5-123A 2011-11-26 10-28-14\ASH-30-70-IML-
                220MM.M
Last changed    : 11/26/2011 11:18:21 AM by lqh
                (modified after loading)
Analysis Method : D:\LC\201111\LQH\LQH-5-123\LQH-5-123A 2011-11-26 10-28-14\095-0301.D\DA.M
                (ASH-30-70-IML-220MM.M)
Last changed    : 11/26/2011 11:55:41 AM by HZL
                (modified after loading)
=====
```

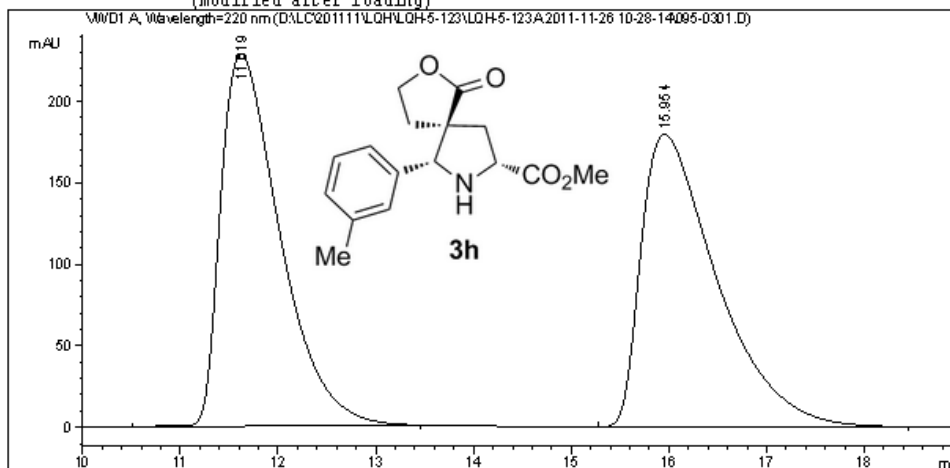

=====  
Area Percent Report  
=====

Sorted By : Signal  
Multiplier : 1.0000  
Dilution : 1.0000  
Use Multiplier & Dilution Factor with ISTDs

Signal 1: VWD1 A, Wavelength=220 nm

| Peak # | RetTime [min] | Type | Width [min] | Area mAU   | Height [mAU] | Area %  |
|--------|---------------|------|-------------|------------|--------------|---------|
| 1      | 11.619        | BB   | 0.6491      | 9637.21875 | 228.60901    | 49.8263 |
| 2      | 15.954        | BB   | 0.8179      | 9704.40039 | 179.70007    | 50.1737 |

Totals : 1.93416e4 408.30908

=====  
\*\*\* End of Report \*\*\*

Instrument 1 11/26/2011 11:55:46 AM HZL

Page 1 of 1

Data File D:\LC\201111\THL\THL-12-43B\THL-12-43B 2011-11-29 11-18-34\084-1001.D  
 Sample Name: LQH-5-124D

```

=====
Acq. Operator   : THL                      Seq. Line :   10
Acq. Instrument : Instrument 1             Location  : Vial 84
Injection Date  : 11/29/2011 2:35:16 PM   Inj       :    1
                                           Inj Volume: 5 µl
Acq. Method     : D:\LC\201111\thl\THL-12-43B\THL-12-43B 2011-11-29 11-18-34\ASH-30-70-10ML-
                220NM-30MIN.M
Last changed    : 11/24/2011 8:37:08 PM by HZL
Analysis Method : D:\LC\201111\THL\THL-12-43B\THL-12-43B 2011-11-29 11-18-34\084-1001.D\DA.M
                (ASH-30-70-10ML-220NM-30MIN.M)
Last changed    : 12/1/2011 9:54:26 PM by LTL
                (modified after loading)
    
```

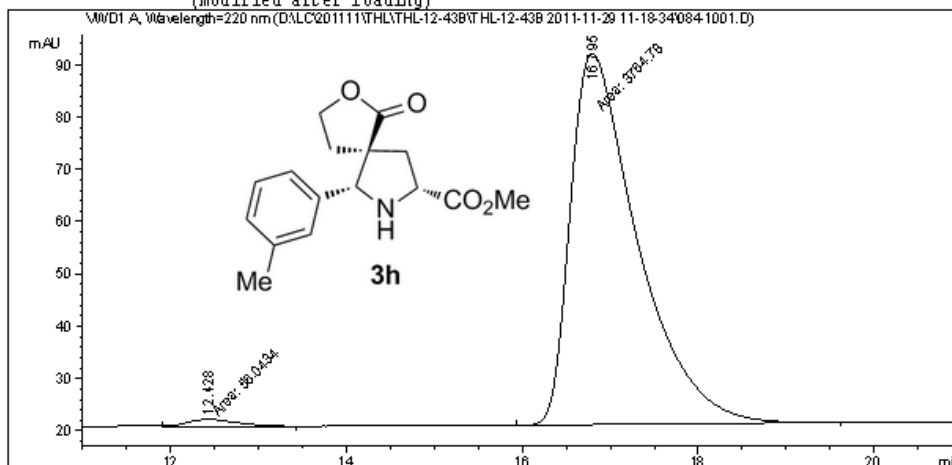

=====  
 Area Percent Report  
 =====

```

Sorted By      :      Signal
Multiplier     :      1.0000
Dilution       :      1.0000
Use Multiplier & Dilution Factor with ISTDs
    
```

Signal 1: VMD1 A, Wavelength=220 nm

| Peak # | RetTime [min] | Type | Width [min] | Area mAU   | Area %  | Height [mAU] | Area %  |
|--------|---------------|------|-------------|------------|---------|--------------|---------|
| 1      | 12.428        | PM   | 0.6728      | 56.04337   | 1.4668  | 1.38823      | 1.4668  |
| 2      | 16.795        | MM   | 0.8837      | 3764.78394 | 98.5332 | 71.00076     | 98.5332 |

Totals :                                    3820.82731    72.38900

=====  
 \*\*\* End of Report \*\*\*

Instrument 1 12/1/2011 9:54:32 PM LTL

Page 1 of 1

Data File D:\LC\201111\LQH\LQH-5-117\LQH-5-117 2011-11-23 08-40-38\082-0201.D  
 Sample Name: LQH-5-117B

```

=====
Acq. Operator   : LQH                      Seq. Line :    2
Acq. Instrument : Instrument 1              Location  : Vial 82
Injection Date  : 11/23/2011 9:14:33 AM    Inj       :    1
                                           Inj Volume:    5 µl

Acq. Method     : D:\LC\201111\LQH\LQH-5-117\LQH-5-117 2011-11-23 08-40-38\ASH-30-70-1ML-
220NM.M
Last changed    : 11/23/2011 10:09:43 AM by LQH
(modified after loading)
Analysis Method : D:\LC\201111\LQH\LQH-5-117\LQH-5-117 2011-11-23 08-40-38\082-0201.D\DA.M (
ASH-30-70-1ML-220NM.M)
Last changed    : 11/26/2011 11:39:06 AM by HZL
(modified after loading)
    
```

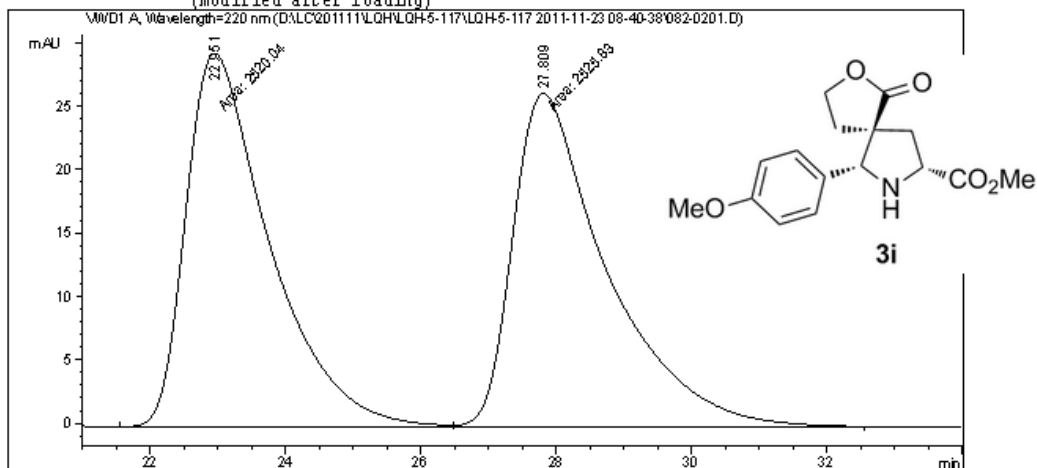

Area Percent Report

```

Sorted By      :      Signal
Multiplier     :      1.0000
Dilution       :      1.0000
Use Multiplier & Dilution Factor with ISTDs
    
```

Signal 1: VWD1 A, Wavelength=220 nm

| Peak # | RetTime [min] | Type | Width [min] | Area mAU *s | Height [mAU] | Area %  |
|--------|---------------|------|-------------|-------------|--------------|---------|
| 1      | 22.951        | MF   | 1.4289      | 2520.03613  | 29.39459     | 49.9426 |
| 2      | 27.809        | FM   | 1.6038      | 2525.83228  | 26.24825     | 50.0574 |

Totals :                   5045.86841   55.64285

\*\*\* End of Report \*\*\*



Data File D:\LC\201111\LQH\LQH-5-119\LQH-5-119B 2011-11-29 08-39-50\051-0201.D  
 Sample Name: LQH-5-119B

```

=====
Acq. Operator   : LQH                      Seq. Line :    2
Acq. Instrument : Instrument 1              Location  : Vial 51
Injection Date  : 11/29/2011 8:52:34 AM    Inj       :    1
                                           Inj Volume: 5 µl
Acq. Method    : D:\LC\201111\LQH\LQH-5-119\LQH-5-119B 2011-11-29 08-39-50\ASH-30-70-10ML-
                220NM-35MIN.M
Last changed   : 11/28/2011 9:40:40 PM by tmc
Analysis Method : D:\LC\201111\LQH\LQH-5-119\LQH-5-119B 2011-11-29 08-39-50\051-0201.D\DA.M
                (ASH-30-70-10ML-220NM-35MIN.M)
Last changed   : 12/1/2011 5:05:49 PM by LTL
                (modified after loading)
    
```

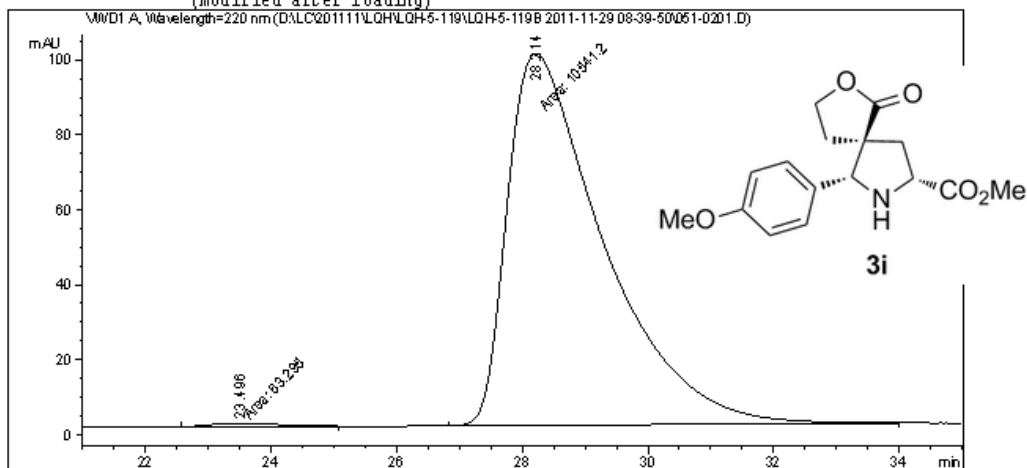

=====  
 Area Percent Report  
 =====

```

Sorted By      :      Signal
Multiplier     :      1.0000
Dilution       :      1.0000
Use Multiplier & Dilution Factor with ISTDs
    
```

Signal 1: VMD1 A, Wavelength=220 nm

| Peak # | RetTime [min] | Type | Width [min] | Area mAU  | Area %  | Height [mAU] |
|--------|---------------|------|-------------|-----------|---------|--------------|
| 1      | 23.496        | MM   | 1.1791      | 63.29495  | 0.5969  | 8.94683e-1   |
| 2      | 28.214        | MM   | 1.7706      | 1.05412e4 | 99.4031 | 99.22559     |

Totals :                    1.06045e4    100.12028

=====  
 \*\*\* End of Report \*\*\*

Data File D:\LC\201111\LQH\LQH-5-123\LQH-5-123A-C 2011-11-26 14-58-40\071-0201.D  
Sample Name: LQH-5-123A

```
=====
Acq. Operator   : LQH                               Seq. Line :    2
Acq. Instrument : Instrument 1                       Location  : Vial 71
Injection Date  : 11/26/2011 3:11:18 PM             Inj       :    1
                                                    Inj Volume: 5 µl
Acq. Method     : D:\LC\201111\LQH\LQH-5-123\LQH-5-123A-C 2011-11-26 14-58-40\ASH-30-70-IML-
                220NM.M
Last changed    : 11/26/2011 3:46:33 PM by LQH
                (modified after loading)
Analysis Method : D:\LC\201111\LQH\LQH-5-123\LQH-5-123A-C 2011-11-26 14-58-40\071-0201.D\DA.
                M (ASH-30-70-IML-220NM.M)
Last changed    : 11/29/2011 11:45:14 AM by tmc
                (modified after loading)
=====
```

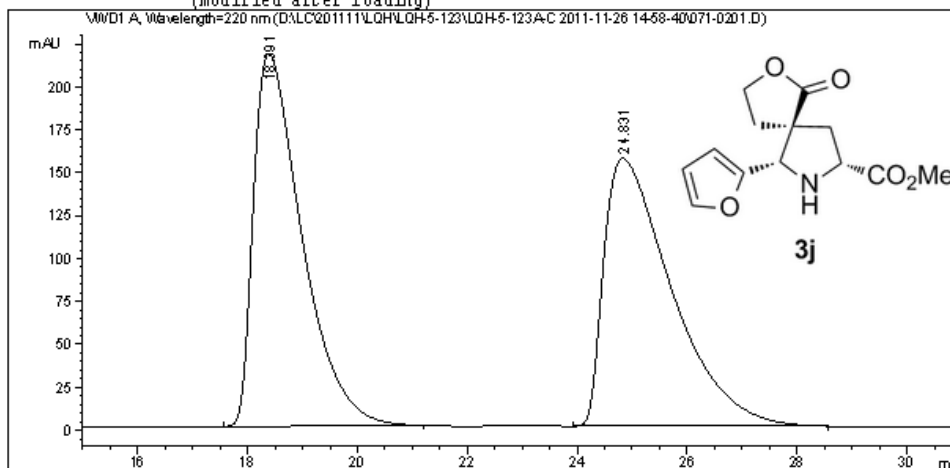

=====  
Area Percent Report  
=====

Sorted By : Signal  
Multiplier : 1.0000  
Dilution : 1.0000  
Use Multiplier & Dilution Factor with ISTDs

Signal 1: VWD1 A, Wavelength=220 nm

| Peak # | RetTime [min] | Type | Width [min] | Area mAU  | Height [mAU] | Area %  |
|--------|---------------|------|-------------|-----------|--------------|---------|
| 1      | 18.391        | BB   | 0.9337      | 1.33091e4 | 217.06453    | 49.8675 |
| 2      | 24.831        | BB   | 1.2838      | 1.33798e4 | 156.12032    | 50.1325 |

Totals : 2.66889e4 373.18484

=====  
\*\*\* End of Report \*\*\*

Instrument 1 11/29/2011 11:45:19 AM tmc

Page 1 of 1

Data File D:\LC\201111\LQH\LQH-5-124\LQH-5-124 2011-11-28 21-46-14\055-0601.D  
 Sample Name: LQH-5-124E

```
=====
Acq. Operator   : LQH                               Seq. Line :    6
Acq. Instrument : Instrument 1                       Location  : Vial 55
Injection Date  : 11/29/2011 12:25:19 AM           Inj       :    1
                                                    Inj Volume:    5 µl

Acq. Method     : D:\LC\201111\LQH\LQH-5-124\LQH-5-124 2011-11-28 21-46-14\ASH-30-70-10ML-
                220NM-35MIN.M
Last changed    : 11/28/2011 9:40:40 PM by tmc
Analysis Method : D:\LC\201111\LQH\LQH-5-124\LQH-5-124 2011-11-28 21-46-14\055-0601.D\DA.M (
                ASH-30-70-10ML-220NM-35MIN.M)
Last changed    : 11/29/2011 12:01:44 PM by tmc
                (modified after loading)
=====
```

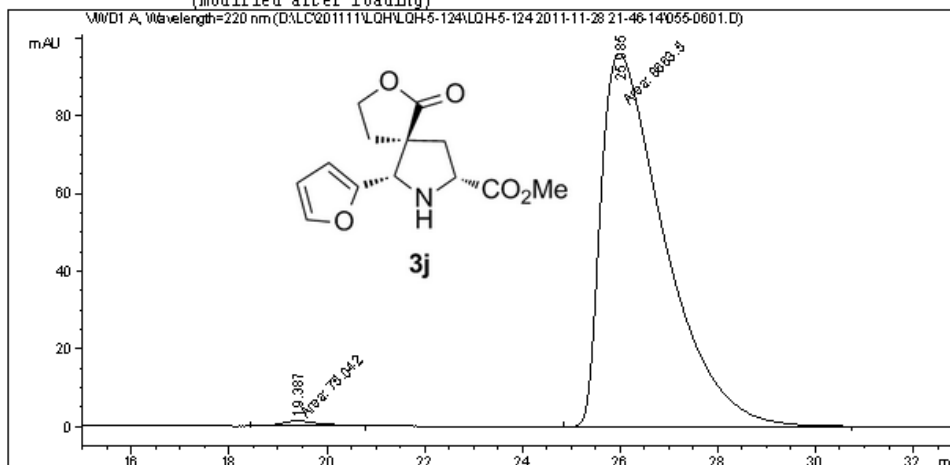

=====  
 Area Percent Report  
 =====

Sorted By : Signal  
 Multiplier : 1.0000  
 Dilution : 1.0000  
 Use Multiplier & Dilution Factor with ISTDs

Signal 1: VMD1 A, Wavelength=220 nm

| Peak # | RetTime [min] | Type | Width [min] | Area mAU   | Area %  | Height [mAU] |
|--------|---------------|------|-------------|------------|---------|--------------|
| 1      | 19.387        | MM   | 0.9288      | 75.04195   | 0.8587  | 1.34653      |
| 2      | 25.985        | MM   | 1.5016      | 8663.50488 | 99.1413 | 96.16138     |

Totals : 8738.54684 97.50791

=====  
 \*\*\* End of Report \*\*\*

Data File D:\LC\201111\LQH\LQH-5-123\LQH-5-123A-C 2011-11-26 14-58-40\072-0301.D  
 Sample Name: LQH-5-123B

```

=====
Acq. Operator   : LQH                               Seq. Line :    3
Acq. Instrument : Instrument 1                       Location  : Vial 72
Injection Date  : 11/26/2011 3:48:16 PM             Inj       :    1
                                                    Inj Volume: 5 µl
Acq. Method     : D:\LC\201111\LQH\LQH-5-123\LQH-5-123A-C 2011-11-26 14-58-40\ASH-30-70-IML-
                220MM.M
Last changed    : 11/26/2011 4:19:52 PM by LQH
                (modified after loading)
Analysis Method : D:\LC\201111\LQH\LQH-5-123\LQH-5-123A-C 2011-11-26 14-58-40\072-0301.D\DA.
                M (ASH-30-70-IML-220MM.M)
Last changed    : 11/29/2011 11:46:54 AM by tmc
                (modified after loading)
    
```

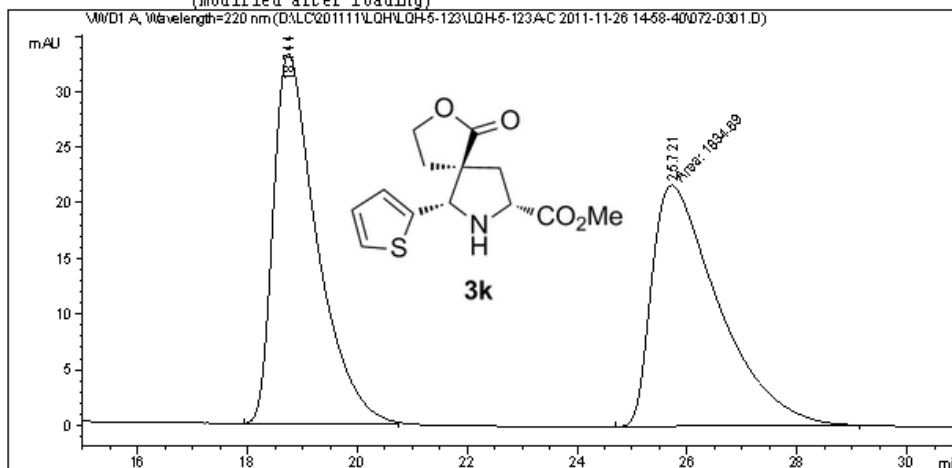

=====  
 Area Percent Report  
 =====

```

Sorted By      :      Signal
Multiplier     :      1.0000
Dilution      :      1.0000
Use Multiplier & Dilution Factor with ISTDs
    
```

Signal 1: VWD1 A, Wavelength=220 nm

| Peak # | RetTime [min] | Type | Width [min] | Area mAU   | Height [mAU] | Area %  |
|--------|---------------|------|-------------|------------|--------------|---------|
| 1      | 18.744        | BB   | 0.8101      | 1828.05859 | 33.26278     | 49.9095 |
| 2      | 25.721        | MM   | 1.4108      | 1834.68884 | 21.67430     | 50.0905 |

Totals :                      3662.74744    54.93708

=====  
 \*\*\* End of Report \*\*\*

Instrument 1 11/29/2011 11:46:58 AM tmc

Page 1 of 1

Data File D:\LC\201111\LQH\LQH-5-124\LQH-5-124 2011-11-28 21-46-14\056-0701.D  
 Sample Name: LQH-5-124F

```

=====
Acq. Operator   : LQH                      Seq. Line :    7
Acq. Instrument : Instrument 1              Location  : Vial 56
Injection Date  : 11/29/2011 1:01:47 AM    Inj       :    1
                                           Inj Volume: 5 µl
Acq. Method     : D:\LC\201111\LQH\LQH-5-124\LQH-5-124 2011-11-28 21-46-14\ASH-30-70-10ML-
                220NM-35MIN.M
Last changed    : 11/28/2011 9:40:40 PM by tmc
Analysis Method : D:\LC\201111\LQH\LQH-5-124\LQH-5-124 2011-11-28 21-46-14\056-0701.D\DA.M (
                ASH-30-70-10ML-220NM-35MIN.M)
Last changed    : 12/1/2011 5:13:39 PM by LTL
                (modified after loading)
    
```

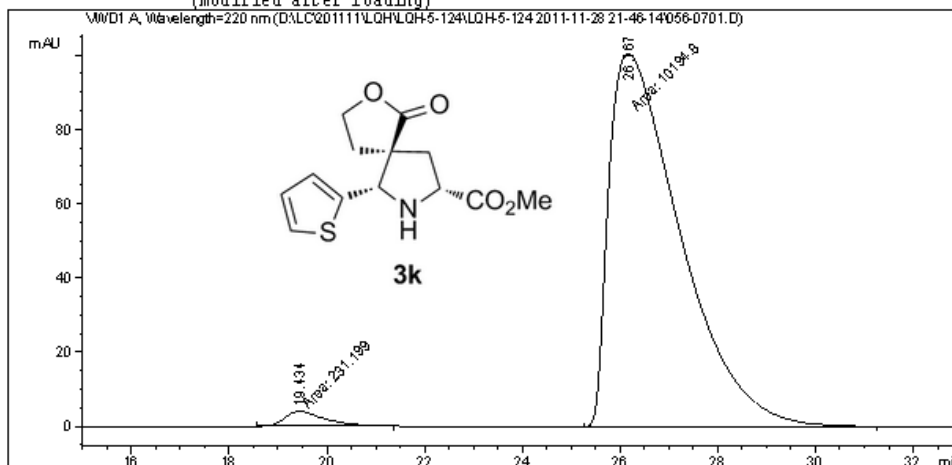

=====  
 Area Percent Report  
 =====

```

Sorted By      : Signal
Multiplier     : 1.0000
Dilution       : 1.0000
Use Multiplier & Dilution Factor with ISTDs
    
```

Signal 1: VWD1 A, Wavelength=220 nm

| Peak # | RetTime [min] | Type | Width [min] | Area mAU  | Area %  | Height [mAU] |
|--------|---------------|------|-------------|-----------|---------|--------------|
| 1      | 19.434        | MM   | 0.9583      | 231.19904 | 2.2175  | 4.02083      |
| 2      | 26.167        | MM   | 1.6899      | 1.01948e4 | 97.7825 | 100.54826    |

Totals :                    1.04260e4    104.56909

=====  
 \*\*\* End of Report \*\*\*

Data File D:\LC\201111\LQH\LQH-5-123\LQH-5-123D 2011-11-26 17-01-03\074-0101.D  
 Sample Name: LQH-5-123D

```

=====
Acq. Operator   : LQH                               Seq. Line :    1
Acq. Instrument : Instrument 1                       Location  : Vial 74
Injection Date  : 11/26/2011 5:02:42 PM             Inj       :    1
                                                    Inj Volume: 5 µl
Acq. Method    : D:\LC\201111\LQH\LQH-5-123\LQH-5-123D 2011-11-26 17-01-03\ASH-30-70-IML-
                220NM.M
Last changed   : 9/7/2011 3:17:43 PM by thl
Analysis Method : D:\LC\201111\LQH\LQH-5-123\LQH-5-123D 2011-11-26 17-01-03\074-0101.D\DA.M
                (ASH-30-70-IML-220NM.M)
Last changed   : 11/29/2011 11:52:00 AM by tmc
                (modified after loading)
    
```

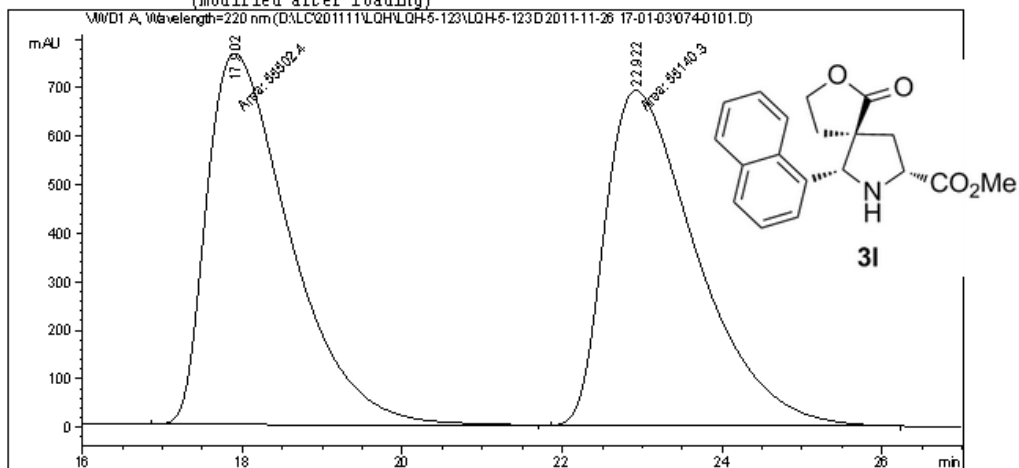

Area Percent Report

```

Sorted By      : Signal
Multiplier     : 1.0000
Dilution       : 1.0000
Use Multiplier & Dilution Factor with ISTDs
    
```

Signal 1: VMD1 A, Wavelength=220 nm

| Peak # | RetTime [min] | Type | Width [min] | Area mAU  | Area %  | Height [mAU] |
|--------|---------------|------|-------------|-----------|---------|--------------|
| 1      | 17.902        | MM   | 1.2084      | 5.55024e4 | 50.1636 | 765.53265    |
| 2      | 22.922        | MM   | 1.3314      | 5.51403e4 | 49.8364 | 690.26672    |

Totals : 1.10643e5 1455.79938

\*\*\* End of Report \*\*\*

Instrument 1 11/29/2011 11:52:06 AM tmc

Page 1 of 1

Data File D:\LC\201111\LQH\LQH-5-124\LQH-5-124H 2011-12-01 08-43-22\094-0301.D  
 Sample Name: LQH-5-124H

```
=====
Acq. Operator   : LQH                               Seq. Line :    3
Acq. Instrument : Instrument 1                       Location  : Vial 94
Injection Date  : 12/1/2011 9:32:19 AM              Inj       :    1
                                                    Inj Volume: 5 µl

Acq. Method     : D:\LC\201111\LQH\LQH-5-124\LQH-5-124H 2011-12-01 08-43-22\ASH-30-70-10ML-
                220NM-40MIN.M
Last changed    : 11/29/2011 11:42:14 AM by tmc
Analysis Method : D:\LC\201111\LQH\LQH-5-124\LQH-5-124H 2011-12-01 08-43-22\094-0301.D\DA.M
                (ASH-30-70-10ML-220NM-40MIN.M)
Last changed    : 12/1/2011 9:52:17 PM by LTL
                (modified after loading)
=====
```

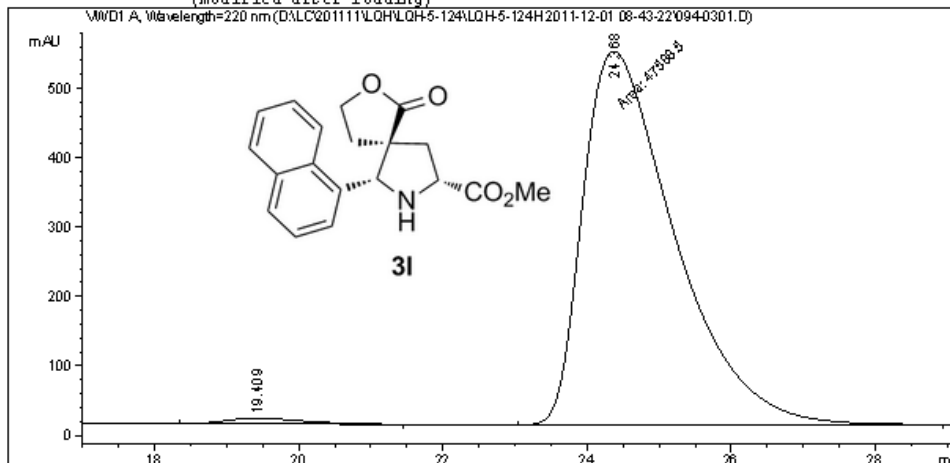

=====  
 Area Percent Report  
 =====

```
Sorted By      :      Signal
Multiplier     :      1.0000
Dilution       :      1.0000
Use Multiplier & Dilution Factor with ISTDs
```

Signal 1: VMD1 A, Wavelength=220 nm

| Peak # | RetTime [min] | Type | Width [min] | Area mAU  | Area %  | Height [mAU] |
|--------|---------------|------|-------------|-----------|---------|--------------|
| 1      | 19.409        | BB   | 1.1118      | 632.18121 | 1.3110  | 8.26942      |
| 2      | 24.368        | MM   | 1.4743      | 4.75885e4 | 98.6890 | 537.98401    |

Totals : 4.82207e4 546.25343

=====  
 \*\*\* End of Report \*\*\*

Data File D:\LC\201111\LQH\LQH-5-123\LQH-5-123A-C 2011-11-26 14-58-40\073-0401.D  
Sample Name: LQH-5-123C

```
=====
Acq. Operator   : LQH                               Seq. Line :    4
Acq. Instrument : Instrument 1                       Location  : Vial 73
Injection Date  : 11/26/2011 4:21:35 PM            Inj       :    1
                                                    Inj Volume: 5 µl

Acq. Method     : D:\LC\201111\LQH\LQH-5-123\LQH-5-123A-C 2011-11-26 14-58-40\ASH-30-70-IML-
                220NM.M
Last changed    : 11/26/2011 4:59:25 PM by LQH
                (modified after loading)
Analysis Method : D:\LC\201111\LQH\LQH-5-123\LQH-5-123A-C 2011-11-26 14-58-40\073-0401.D\DA.
                M (ASH-30-70-IML-220NM.M)
Last changed    : 11/29/2011 11:48:12 AM by tmc
                (modified after loading)
=====
```

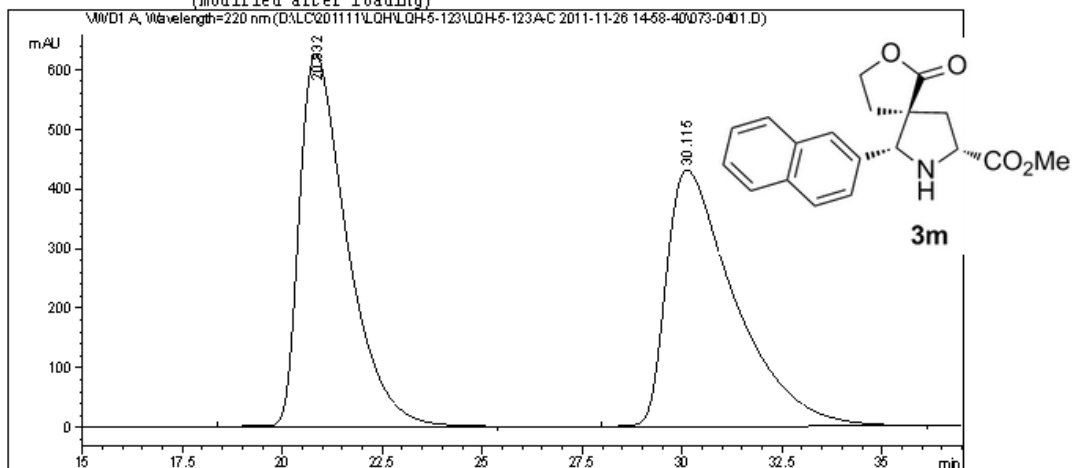

=====  
Area Percent Report  
=====

Sorted By : Signal  
Multiplier : 1.0000  
Dilution : 1.0000  
Use Multiplier & Dilution Factor with ISTDs

Signal 1: VWD1 A, Wavelength=220 nm

| Peak # | RetTime [min] | Type | Width [min] | Area mAU  | Height [mAU] | Area %  |
|--------|---------------|------|-------------|-----------|--------------|---------|
| 1      | 20.832        | BB   | 1.2513      | 5.16021e4 | 625.16650    | 49.9967 |
| 2      | 30.115        | BB   | 1.7414      | 5.16089e4 | 430.29391    | 50.0033 |

Totals : 1.03211e5 1055.46042

=====  
\*\*\* End of Report \*\*\*

Instrument 1 11/29/2011 11:48:21 AM tmc

Page 1 of 1



Data File D:\LC\201111\THL\THL-12-43B\THL-12-43B 2011-11-29 11-18-34\085-1101.D  
 Sample Name: LQH-5-124G

```

=====
Acq. Operator   : THL                      Seq. Line :   11
Acq. Instrument : Instrument 1              Location  : Vial 85
Injection Date  : 11/29/2011 3:06:32 PM    Inj       :    1
                                           Inj Volume: 5 µl

Acq. Method     : D:\LC\201111\thl\THL-12-43B\THL-12-43B 2011-11-29 11-18-34\ASH-30-70-10ML-
                220NM-40MIN.M
Last changed    : 11/29/2011 11:42:14 AM by tmc
Analysis Method : D:\LC\201111\THL\THL-12-43B\THL-12-43B 2011-11-29 11-18-34\085-1101.D\DA.M
                (ASH-30-70-10ML-220NM-40MIN.M)
Last changed    : 12/1/2011 9:56:27 PM by LTL
                (modified after loading)
    
```

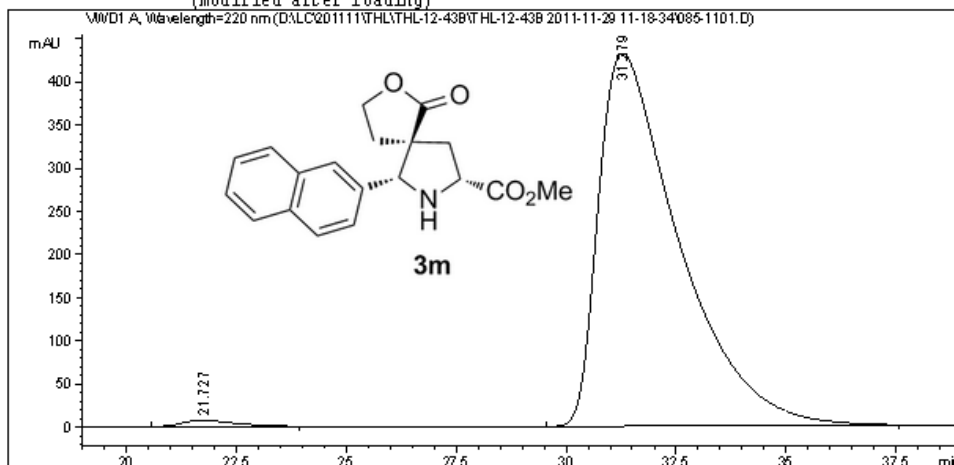

Area Percent Report

```

Sorted By      :      Signal
Multiplier     :      1.0000
Dilution       :      1.0000
Use Multiplier & Dilution Factor with ISTDs
    
```

Signal 1: VMD1 A, Wavelength=220 nm

| Peak # | RetTime [min] | Type | Width [min] | Area mAU  | Area %  | Height [mAU] |
|--------|---------------|------|-------------|-----------|---------|--------------|
| 1      | 21.727        | BB   | 1.1171      | 592.79419 | 1.0663  | 7.07624      |
| 2      | 31.279        | BB   | 1.8771      | 5.49990e4 | 98.9337 | 431.95871    |

Totals :                      5.55918e4    439.03495

\*\*\* End of Report \*\*\*

Data File D:\LC\DATA\LQH\LQH-8-67\LQH-8-67B 2012-07-19 19-00-08\081-0301.D  
Sample Name: LQH-8-67B

```
=====
Acq. Operator   : LQH                               Seq. Line :    3
Acq. Instrument : Instrument 1                       Location  : Vial 81
Injection Date  : 7/19/2012 8:11:32 PM              Inj       :    1
                                                    Inj Volume: 5 µl
Acq. Method     : D:\LC\DATA\LQH\LQH-8-67\LQH-8-67B 2012-07-19 19-00-08\ADH-30-70-10ML-
                210NM.M
Last changed    : 7/19/2012 8:39:58 PM by LQH
                (modified after loading)
Analysis Method : D:\LC\DATA\LQH\LQH-8-67\LQH-8-67B 2012-07-19 19-00-08\081-0301.D\DA.M (
                ADH-30-70-10ML-210NM.M)
Last changed    : 3/16/2013 4:47:33 PM by FX
                (modified after loading)
=====
```

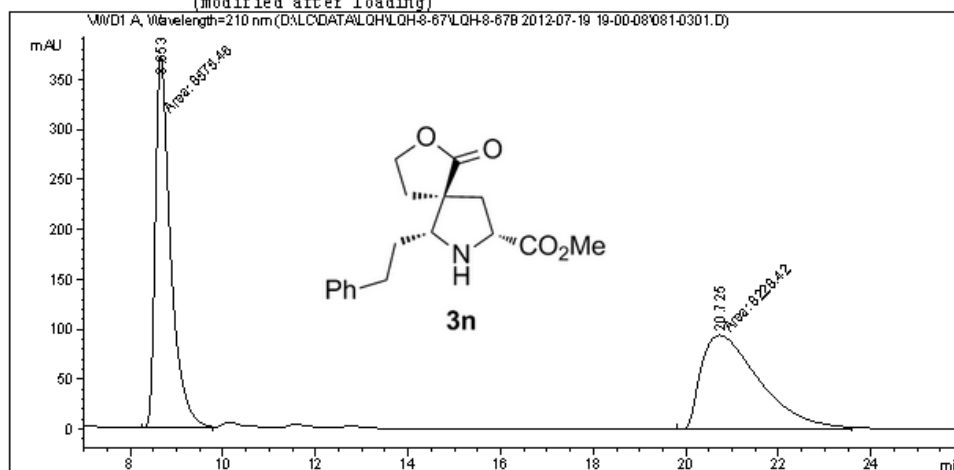

=====  
Area Percent Report  
=====

Sorted By : Signal  
Multiplier : 1.0000  
Dilution : 1.0000  
Use Multiplier & Dilution Factor with ISTDs

Signal 1: VWD1 A, Wavelength=210 nm

| Peak # | RetTime [min] | Type | Width [min] | Area mAU   | Height [mAU] | Area %  |
|--------|---------------|------|-------------|------------|--------------|---------|
| 1      | 8.653         | MM   | 0.3835      | 8575.46191 | 372.67734    | 51.0326 |
| 2      | 20.725        | MF   | 1.4618      | 8228.41699 | 93.81354     | 48.9674 |

Totals : 1.68039e4 466.49088

=====  
\*\*\* End of Report \*\*\*

Instrument 1 3/16/2013 4:47:37 PM FX

Page 1 of 1

Data File D:\LC\DATA\LQH\LQH-8-67\LQH-8-67B 2012-07-19 19-00-08\082-0401.D  
Sample Name: LQH-8-68B

```
=====
Acq. Operator   : LQH                               Seq. Line :    4
Acq. Instrument : Instrument 1                       Location  : Vial 82
Injection Date  : 7/19/2012 8:43:27 PM              Inj       :    1
                                                    Inj Volume: 5 µl
Acq. Method     : D:\LC\DATA\LQH\LQH-8-67\LQH-8-67B 2012-07-19 19-00-08\ADH-30-70-10ML-
                210NM.M
Last changed    : 7/19/2012 8:41:40 PM by LQH
                (modified after loading)
Analysis Method : D:\LC\DATA\LQH\LQH-8-67\LQH-8-67B 2012-07-19 19-00-08\082-0401.D\DA.M (
                ADH-30-70-10ML-210NM.M)
Last changed    : 3/16/2013 4:49:45 PM by FX
                (modified after loading)
=====
```

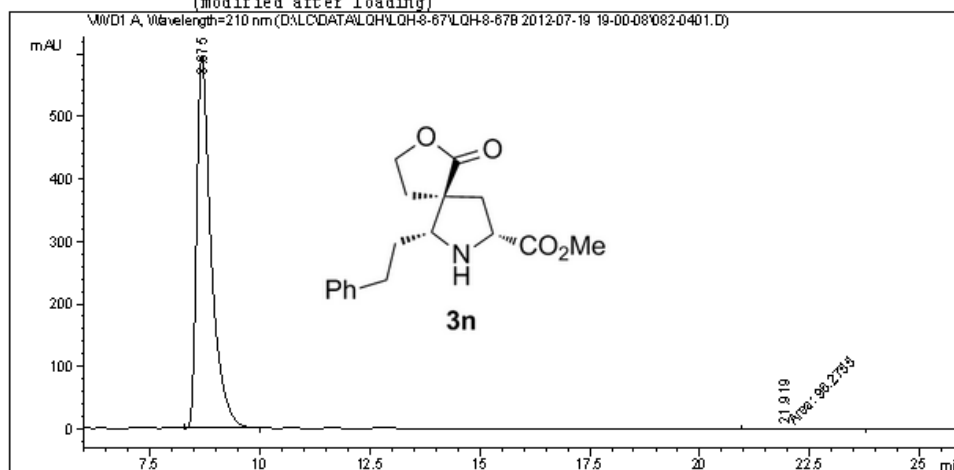

=====  
Area Percent Report  
=====

Sorted By : Signal  
Multiplier : 1.0000  
Dilution : 1.0000  
Use Multiplier & Dilution Factor with ISTDs

Signal 1: VWD1 A, Wavelength=210 nm

| Peak # | RetTime [min] | Type | Width [min] | Area mAU  | Height [mAU] | Area %  |
|--------|---------------|------|-------------|-----------|--------------|---------|
| 1      | 8.675         | VB   | 0.3392      | 1.36807e4 | 595.89819    | 99.3012 |
| 2      | 21.919        | MM   | 1.3188      | 96.27553  | 1.21669      | 0.6988  |

Totals : 1.37770e4 597.11489

=====  
\*\*\* End of Report \*\*\*

Instrument 1 3/16/2013 4:49:56 PM FX

Page 1 of 1

Data File D:\LC\DATA\LQH\LQH-8-67\LQH-8-68A 2012-07-19 09-43-19\095-0401.D  
 Sample Name: LQH-8-67A

```

=====
Acq. Operator   : LQH                      Seq. Line :    4
Acq. Instrument : Instrument 1              Location  : Vial 95
Injection Date  : 7/19/2012 11:36:58 AM    Inj       :    1
                                           Inj Volume: 5 µl

Acq. Method     : D:\LC\DATA\LQH\LQH-8-67\LQH-8-68A 2012-07-19 09-43-19\ASH-20-80-10ML-205NM-25MIN.M
Last changed    : 7/19/2012 11:28:51 AM by LQH
Analysis Method : D:\LC\DATA\LQH\LQH-8-67\LQH-8-68A 2012-07-19 09-43-19\095-0401.D\DA.M (
                ASH-20-80-10ML-205NM-25MIN.M)
Last changed    : 3/16/2013 4:36:41 PM by FX
                (modified after loading)
    
```

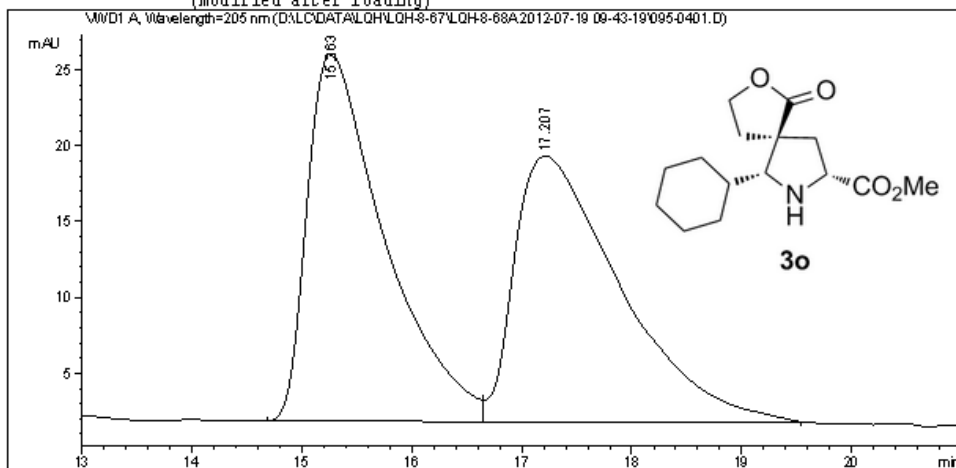

=====  
 Area Percent Report  
 =====

```

Sorted By      :      Signal
Multiplier     :      1.0000
Dilution       :      1.0000
Use Multiplier & Dilution Factor with ISTDs
    
```

Signal 1: VMD1 A, Wavelength=205 nm

| Peak # | RetTime [min] | Type | Width [min] | Area mAU   | Area %  | Height [mAU] |
|--------|---------------|------|-------------|------------|---------|--------------|
| 1      | 15.263        | BV   | 0.7113      | 1186.18982 | 50.2759 | 24.27481     |
| 2      | 17.207        | VB   | 0.9290      | 1173.17004 | 49.7241 | 17.53744     |

Totals :                    2359.35986    41.81225

=====  
 \*\*\* End of Report \*\*\*

Data File D:\LC\DATA\LQH\LQH-8-67\LQH-8-68A 2012-07-19 09-43-19\096-0101.D  
Sample Name: LQH-8-68A

```
=====
Acq. Operator   : LQH                      Seq. Line :    1
Acq. Instrument : Instrument 1              Location  : Vial 96
Injection Date  : 7/19/2012 9:44:37 AM     Inj       :    1
                                           Inj Volume: 5 µl
Acq. Method     : D:\LC\DATA\LQH\LQH-8-67\LQH-8-68A 2012-07-19 09-43-19\ASH-20-80-10ML-
                220NM.M
Last changed    : 7/19/2012 10:09:35 AM by LQH
                (modified after loading)
Analysis Method : D:\LC\DATA\LQH\LQH-8-67\LQH-8-68A 2012-07-19 09-43-19\096-0101.D\DA.M (
                ASH-20-80-10ML-220NM.M)
Last changed    : 3/16/2013 4:41:58 PM by FX
                (modified after loading)
=====
```

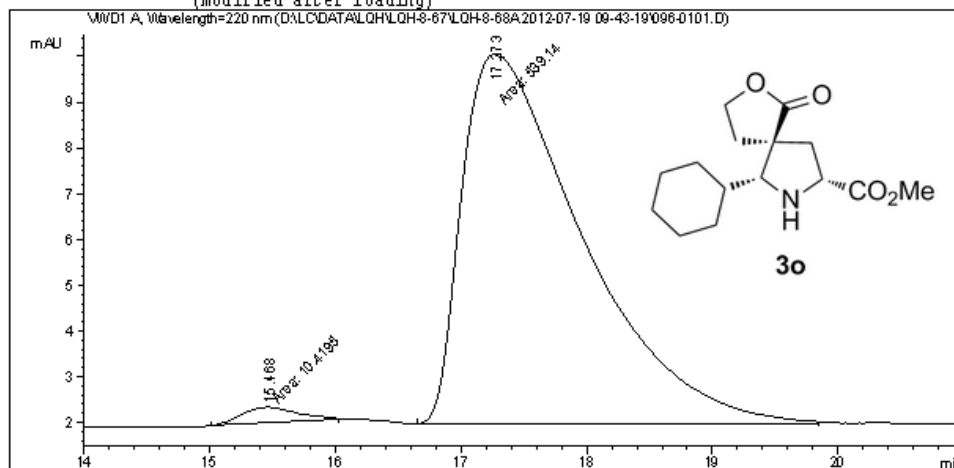

=====  
Area Percent Report  
=====

```
Sorted By      :      Signal
Multiplier     :      1.0000
Dilution       :      1.0000
Use Multiplier & Dilution Factor with ISTDs
```

Signal 1: VWD1 A, Wavelength=220 nm

| Peak # | RetTime [min] | Type | Width [min] | Area mAU*s | Height [mAU] | Area %  |
|--------|---------------|------|-------------|------------|--------------|---------|
| 1      | 15.468        | MM   | 0.3713      | 10.41946   | 3.36199e-1   | 1.8960  |
| 2      | 17.273        | MM   | 1.1095      | 539.13971  | 8.09916      | 98.1040 |

Totals :                    549.55917    8.43536

=====  
\*\*\* End of Report \*\*\*

Data File D:\LC\201201\LQH\LQH-6-47\LQH-6-47A-P-CL 2012-01-12 17-11-31\054-0201.D  
Sample Name: LQH-6-47A-P-CL

```
=====
Acq. Operator   : LQH                               Seq. Line :    2
Acq. Instrument : Instrument 1                       Location  : Vial 54
Injection Date  : 1/12/2012 5:23:58 PM              Inj       :    1
                                                    Inj Volume: 5 µl
Acq. Method     : D:\LC\201201\LQH\LQH-6-47\LQH-6-47A-P-CL 2012-01-12 17-11-31\ASH-50-50-
10ML-220NM-40MIN.M
Last changed    : 12/2/2011 2:34:27 PM by HZL
Analysis Method : D:\LC\201201\LQH\LQH-6-47\LQH-6-47A-P-CL 2012-01-12 17-11-31\054-0201.D\
D.A.M (ASH-50-50-10ML-220NM-40MIN.M)
Last changed    : 2/28/2012 1:47:54 PM by LQH
(modified after loading)
Method Info     : ASH-50-50-1ML-254NM-50MIN
=====
```

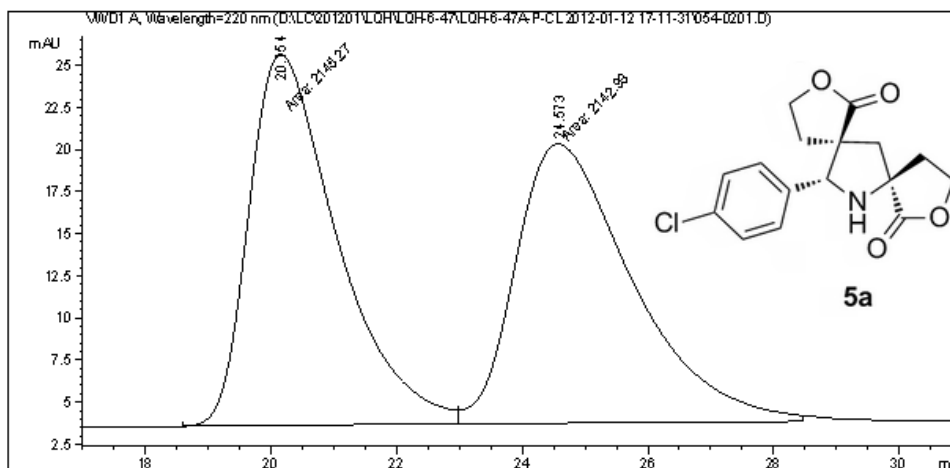

=====  
Area Percent Report  
=====

Sorted By : Signal  
Multiplier : 1.0000  
Dilution : 1.0000  
Use Multiplier & Dilution Factor with ISTDs

Signal 1: WVD1 A, Wavelength=220 nm

| Peak # | RetTime [min] | Type | Width [min] | Area mAU   | Area *s  | Height [mAU] | Area % |
|--------|---------------|------|-------------|------------|----------|--------------|--------|
| 1      | 20.154        | MF   | 1.6216      | 2145.26538 | 22.04838 | 50.0272      |        |
| 2      | 24.573        | FM   | 2.1532      | 2142.93481 | 16.58695 | 49.9728      |        |

Totals : 4288.20020 38.63533

=====  
\*\*\* End of Report \*\*\*

Instrument 1 2/28/2012 1:47:59 PM LQH

Page 1 of 1

Data File D:\LC\201201\LQH\LQH-6-47\LQH-6-47-48 2012-01-12 14-34-45\052-0101.D  
Sample Name: LQH-6-48

```
=====
Acq. Operator   : LQH                      Seq. Line :    1
Acq. Instrument : Instrument 1              Location  : Vial 52
Injection Date  : 1/12/2012 2:36:10 PM     Inj       :    1
                                           Inj Volume: 5 µl
Acq. Method     : D:\LC\201201\LQH\LQH-6-47\LQH-6-47-48 2012-01-12 14-34-45\ASH-50-50-10ML-
220NM-40MIN.M
Last changed    : 12/2/2011 2:34:27 PM by HZL
Analysis Method : D:\LC\201201\LQH\LQH-6-47\LQH-6-47-48 2012-01-12 14-34-45\052-0101.D\DA.M
(ASH-50-50-10ML-220NM-40MIN.M)
Last changed    : 2/28/2012 1:50:53 PM by LQH
(modified after loading)
Method Info     : ASH-50-50-1ML-254NM-50MIN
=====
```

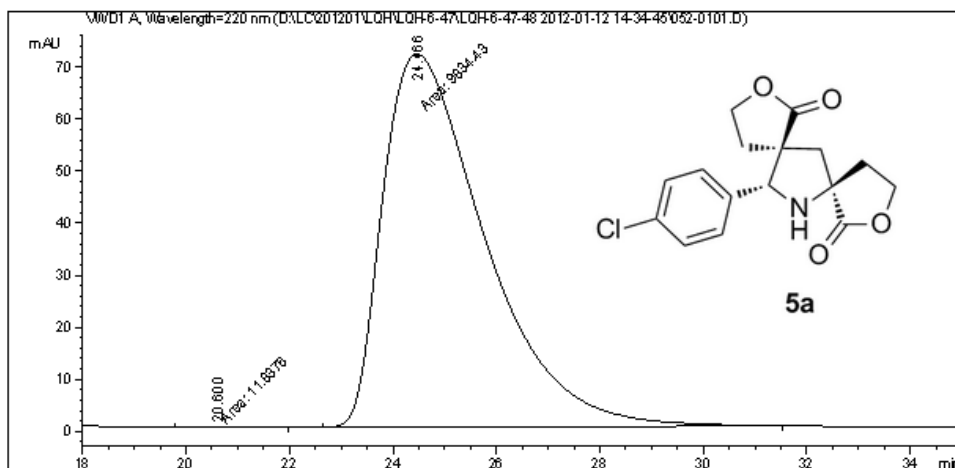

```
=====
                          Area Percent Report
=====
```

```
Sorted By           :      Signal
Multiplier           :      1.0000
Dilution             :      1.0000
Use Multiplier & Dilution Factor with ISTDs
```

Signal 1: WVD1 A, Wavelength=220 nm

| Peak # | RetTime [min] | Type | Width [min] | Area mAU   | Height [mAU] | Area %  |
|--------|---------------|------|-------------|------------|--------------|---------|
| 1      | 20.600        | MM   | 1.3168      | 11.83757   | 1.49823e-1   | 0.1202  |
| 2      | 24.466        | MM   | 2.2858      | 9834.43359 | 71.70798     | 99.8798 |

```
Totals :                          9846.27117  71.85781
```

```
=====
*** End of Report ***
```

Instrument 1 2/28/2012 1:50:58 PM LQH

Page 1 of 1

Data File D:\LC\201201\LQH\LQH-6-91\LQH-6-90A 2012-02-27 17-14-39\037-0101.D  
 Sample Name: LQH-6-90A

```

=====
Acq. Operator   : LQH                      Seq. Line :    1
Acq. Instrument : Instrument 1              Location  : Vial 37
Injection Date  : 2/27/2012 5:16:17 PM     Inj       :    1
                                           Inj Volume: 5 µl
Acq. Method     : D:\LC\201201\LQH\LQH-6-91\LQH-6-90A 2012-02-27 17-14-39\ASH-50-50-10ML-
220NM.M
Last changed    : 12/6/2011 11:03:10 AM by TMC
Analysis Method : D:\LC\201201\LQH\LQH-6-91\LQH-6-90A 2012-02-27 17-14-39\037-0101.D\DA.M (
ASH-50-50-10ML-220NM.M)
Last changed    : 3/9/2012 11:17:25 AM by FX
                  (modified after loading)
    
```

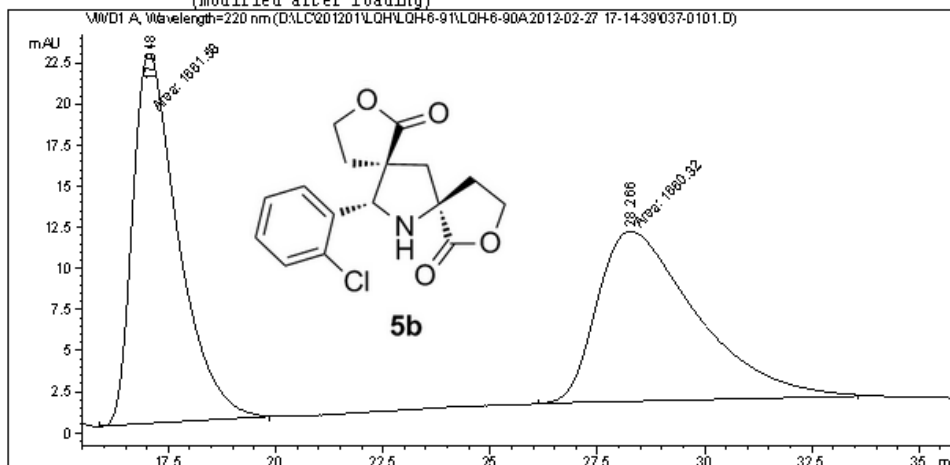

Area Percent Report

```

Sorted By      : Signal
Multiplier     : 1.0000
Dilution       : 1.0000
Use Multiplier & Dilution Factor with ISTDs
    
```

Signal 1: VMD1 A, Wavelength=220 nm

| Peak # | RetTime [min] | Type | Width [min] | Area mAU   | Area %  | Height [mAU] |
|--------|---------------|------|-------------|------------|---------|--------------|
| 1      | 17.048        | MM   | 1.2304      | 1661.57849 | 50.0190 | 22.50783     |
| 2      | 28.266        | MM   | 2.6761      | 1660.31567 | 49.9810 | 10.34035     |

Totals : 3321.89417 32.84818

\*\*\* End of Report \*\*\*



Data File D:\LC\201201\LQH\LQH-6-91\LQH-6-91A 2012-02-27 20-34-15\031-0101.D  
Sample Name: LQH-6-91A

```
=====
Acq. Operator   : LQH                               Seq. Line :    1
Acq. Instrument : Instrument 1                       Location  : Vial 31
Injection Date  : 2/27/2012 8:35:40 PM             Inj       :    1
                                                    Inj Volume: 5 µl
Acq. Method     : D:\LC\201201\LQH\LQH-6-91\LQH-6-91A 2012-02-27 20-34-15\ASH-50-50-10ML-
220NM-40MIN.M
Last changed    : 12/2/2011 2:34:27 PM by HZL
Analysis Method : D:\LC\201201\LQH\LQH-6-91\LQH-6-91A 2012-02-27 20-34-15\031-0101.D\DA.M (
ASH-50-50-10ML-220NM-40MIN.M)
Last changed    : 3/9/2012 11:19:39 AM by FX
(modified after loading)
Method Info     : ASH-50-50-1ML-254NM-50MIN
=====
```

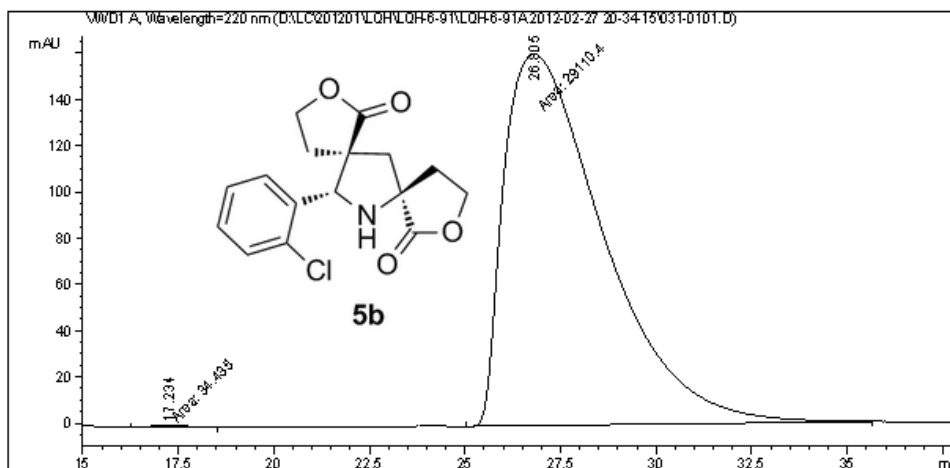

=====  
Area Percent Report  
=====

Sorted By : Signal  
Multiplier : 1.0000  
Dilution : 1.0000  
Use Multiplier & Dilution Factor with ISTDs

Signal 1: VWD1 A, Wavelength=220 nm

| Peak # | RetTime [min] | Type | Width [min] | Area mAU  | Height [mAU] | Area %  |
|--------|---------------|------|-------------|-----------|--------------|---------|
| 1      | 17.234        | MM   | 1.0958      | 34.43504  | 5.23737e-1   | 0.1182  |
| 2      | 26.805        | MM   | 3.0200      | 2.91104e4 | 160.65382    | 99.8818 |

Totals : 2.91448e4 161.17756

=====  
\*\*\* End of Report \*\*\*

Instrument 1 3/9/2012 11:19:47 AM FX

Page 1 of 1

Data File D:\LC\201201\LQH\LQH-6-90\LQH-6-90B 2012-02-27 08-47-40\031-0301.D  
Sample Name: LQH-6-90B

```
=====
Acq. Operator   : LQH                               Seq. Line :    3
Acq. Instrument : Instrument 1                       Location  : Vial 31
Injection Date  : 2/27/2012 9:37:15 AM              Inj       :    1
                                                    Inj Volume: 5 µl
Acq. Method     : D:\LC\201201\LQH\LQH-6-90\LQH-6-90B 2012-02-27 08-47-40\ASH-50-50-10ML-
                220MM.M
Last changed    : 2/27/2012 10:20:41 AM by LQH
                (modified after loading)
Analysis Method : D:\LC\201201\LQH\LQH-6-90\LQH-6-90B 2012-02-27 08-47-40\031-0301.D\DA.M (
                ASH-50-50-10ML-220MM.M)
Last changed    : 3/9/2012 11:15:17 AM by FX
                (modified after loading)
=====
```

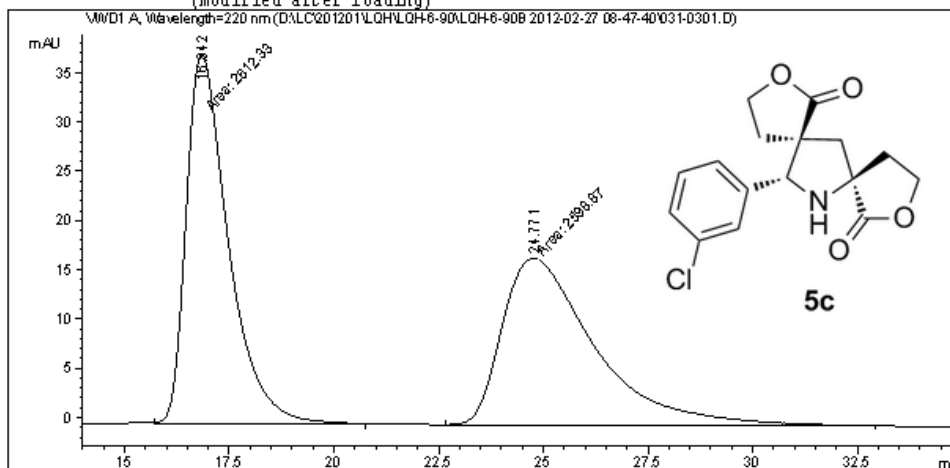

=====  
Area Percent Report  
=====

Sorted By : Signal  
Multiplier : 1.0000  
Dilution : 1.0000  
Use Multiplier & Dilution Factor with ISTDs

Signal 1: VWD1 A, Wavelength=220 nm

| Peak # | RetTime [min] | Type | Width [min] | Area mAU   | Height [mAU] | Area %  |
|--------|---------------|------|-------------|------------|--------------|---------|
| 1      | 16.842        | FM   | 1.1610      | 2612.32788 | 37.50181     | 50.1291 |
| 2      | 24.771        | MM   | 2.5608      | 2598.86987 | 16.91425     | 49.8709 |

Totals : 5211.19775 54.41606

=====  
\*\*\* End of Report \*\*\*

Instrument 1 3/9/2012 11:15:22 AM FX

Page 1 of 1

Data File D:\LC\DATA\LQH\LQH-10-73\LQH-10-73 2013-03-19 10-47-46\095-0201.D  
 Sample Name: LQH-10-73

```

=====
Acq. Operator   : TL                               Seq. Line :    2
Acq. Instrument : Instrument 1                     Location  : Vial 95
Injection Date  : 3/19/2013 11:00:30 AM          Inj       :    1
                                                    Inj Volume: 5 µl

Acq. Method     : D:\LC\DATA\LQH\LQH-10-73\LQH-10-73 2013-03-19 10-47-46\ASH-50-50-10ML-
                220NM-60MIN.M
Last changed    : 12/6/2011 9:55:58 PM by TMC
Analysis Method : D:\LC\DATA\LQH\LQH-10-73\LQH-10-73 2013-03-19 10-47-46\095-0201.D\A.M (
                ASH-50-50-10ML-220NM-60MIN.M)
Last changed    : 4/27/2013 11:14:30 AM by LFL
                (modified after loading)
    
```

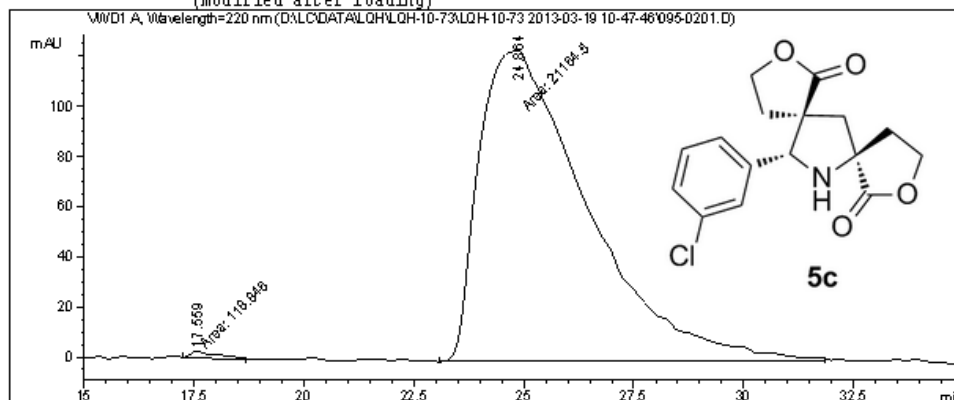

Area Percent Report

```

Sorted By      :      Signal
Multiplier     :      1.0000
Dilution       :      1.0000
Use Multiplier & Dilution Factor with ISTDs
    
```

Signal 1: VWD1 A, Wavelength=220 nm

| Peak # | RetTime [min] | Type | Width [min] | Area mAU  | Height [mAU] | Area %  |
|--------|---------------|------|-------------|-----------|--------------|---------|
| 1      | 17.559        | MM   | 0.7646      | 118.84649 | 2.59046      | 0.5584  |
| 2      | 24.864        | MM   | 2.8497      | 2.11645e4 | 123.78165    | 99.4416 |

Totals :                      2.12834e4    126.37211

\*\*\* End of Report \*\*\*

Data File D:\LC\201201\LQH\LQH-6-93\LQH-6-93BE 2012-03-09 14-49-26\065-0301.D  
Sample Name: LQH-6-93E

```
=====
Acq. Operator   : LQH                               Seq. Line :    3
Acq. Instrument : Instrument 1                       Location  : Vial 65
Injection Date  : 3/9/2012 3:35:13 PM              Inj       :    1
                                                    Inj Volume: 5 µl
Acq. Method     : D:\LC\201201\LQH\LQH-6-93\LQH-6-93BE 2012-03-09 14-49-26\ASH-50-50-10ML-
220MM.M
Last changed    : 3/9/2012 3:33:52 PM by LQH
                  (modified after loading)
Analysis Method : D:\LC\201201\LQH\LQH-6-93\LQH-6-93BE 2012-03-09 14-49-26\065-0301.D\DA.M (
ASH-50-50-10ML-220MM.M)
Last changed    : 3/12/2012 9:39:45 AM by FX
                  (modified after loading)
=====
```

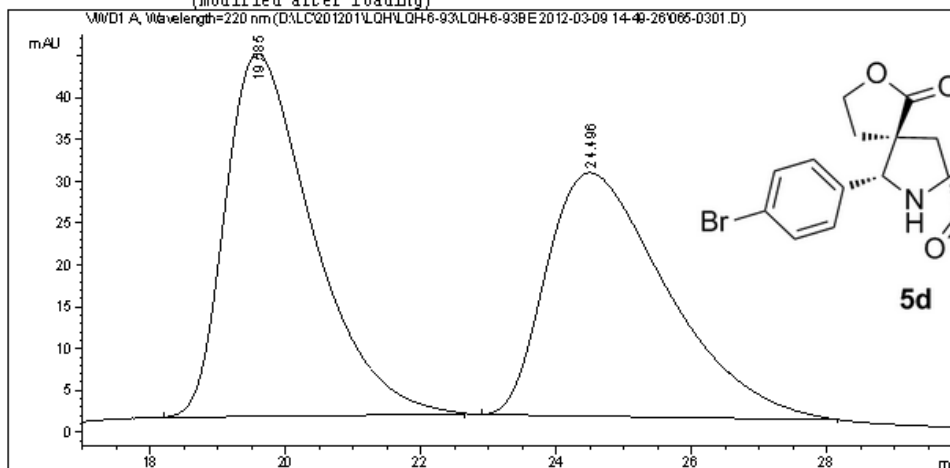

=====  
Area Percent Report  
=====

Sorted By : Signal  
Multiplier : 1.0000  
Dilution : 1.0000  
Use Multiplier & Dilution Factor with ISTDs

Signal 1: VWD1 A, Wavelength=220 nm

| Peak # | RetTime [min] | Type | Width [min] | Area mAU*s | Height [mAU] | Area %  |
|--------|---------------|------|-------------|------------|--------------|---------|
| 1      | 19.585        | BB   | 1.3108      | 3902.00293 | 43.34914     | 51.9619 |
| 2      | 24.496        | BB   | 1.6405      | 3607.35547 | 29.08884     | 48.0381 |

Totals : 7509.35840 72.43799

=====  
\*\*\* End of Report \*\*\*

Instrument 1 3/12/2012 9:39:51 AM FX

Page 1 of 1

Data File D:\LC\201201\FX\FX-5-76\FX-5-76 2012-03-10 18-05-03\043-0701.D  
 Sample Name: LQH-6-94E

```

=====
Acq. Operator   : FX                               Seq. Line :    7
Acq. Instrument : Instrument 1                     Location  : Vial 43
Injection Date  : 3/10/2012 9:35:26 PM           Inj       :    1
                                                    Inj Volume: 5 µl

Acq. Method     : D:\LC\201201\FX\FX-5-76\FX-5-76 2012-03-10 18-05-03\ASH-50-50-10ML-220NM-
40MIN.M
Last changed    : 12/2/2011 2:34:27 PM by HZL
Analysis Method : D:\LC\201201\FX\FX-5-76\FX-5-76 2012-03-10 18-05-03\043-0701.D\DA.M (ASH-
50-50-10ML-220NM-40MIN.M)
Last changed    : 3/12/2012 9:43:14 AM by FX
                : (modified after loading)
Method Info     : ASH-50-50-1ML-254NM-50MIN
    
```

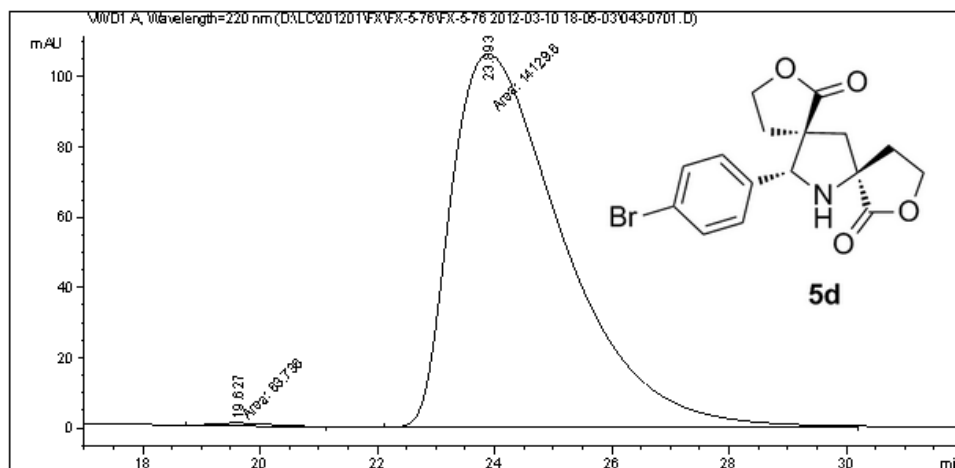

=====  
 Area Percent Report  
 =====

```

Sorted By      :      Signal
Multiplier     :      1.0000
Dilution       :      1.0000
Use Multiplier & Dilution Factor with ISTDs
    
```

Signal 1: VMD1 A, Wavelength=220 nm

| Peak # | RetTime [min] | Type | Width [min] | Area mAU  | Area %  | Height [mAU] |
|--------|---------------|------|-------------|-----------|---------|--------------|
| 1      | 19.627        | MM   | 1.2066      | 63.73604  | 0.4491  | 8.80380e-1   |
| 2      | 23.893        | MM   | 2.2139      | 1.41296e4 | 99.5509 | 106.36858    |

Totals :                    1.41933e4    107.24896

=====  
 \*\*\* End of Report \*\*\*

Instrument 1 3/12/2012 9:43:19 AM FX

Page 1 of 1

Data File D:\LC\201111\LQH\LQH-6-5\LQH-6-5 2011-12-06 09-46-05\081-0201.D  
Sample Name: LQH-6-5C

```
=====
Acq. Operator   : LQH                               Seq. Line :    2
Acq. Instrument : Instrument 1                       Location  : Vial 81
Injection Date  : 12/6/2011 9:58:27 AM              Inj       :    1
                                                    Inj Volume: 5 µl
Acq. Method     : D:\LC\201111\LQH\LQH-6-5\LQH-6-5 2011-12-06 09-46-05\ASH-50-50-10ML-220MM.
M
Last changed    : 12/6/2011 10:28:19 AM by LQH
                  (modified after loading)
Analysis Method : D:\LC\201111\LQH\LQH-6-5\LQH-6-5 2011-12-06 09-46-05\081-0201.D\DA.M (ASH-
50-50-10ML-220MM.M)
Last changed    : 1/2/2012 8:26:38 PM by thl
                  (modified after loading)
Method Info     : ASH-50-50-1ML-254MM-50MIN
=====
```

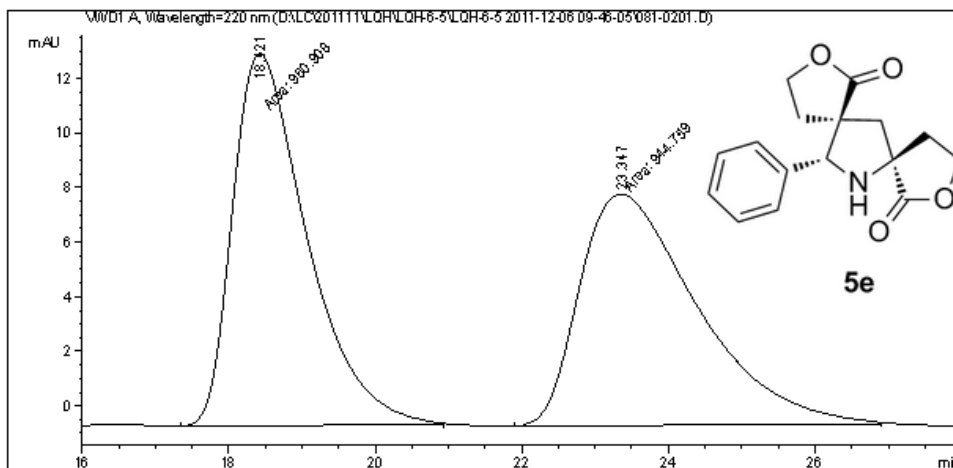

=====  
Area Percent Report  
=====

```
Sorted By      : Signal
Multiplier     : 1.0000
Dilution       : 1.0000
Use Multiplier & Dilution Factor with ISTDs
```

Signal 1: VMD1 A, Wavelength=220 nm

| Peak # | RetTime [min] | Type | Width [min] | Area mAU  | Height [mAU] | Area %  |
|--------|---------------|------|-------------|-----------|--------------|---------|
| 1      | 18.421        | MM   | 1.1746      | 960.90796 | 13.63483     | 50.4237 |
| 2      | 23.347        | MM   | 1.8567      | 944.75897 | 8.48041      | 49.5763 |

Totals : 1905.66693 22.11525

Instrument 1 1/2/2012 8:26:43 PM thl

Page 1 of 1

Data File D:\LC\201112\LQH\LQH-6-HUN\LQH-6-HUN 2012-01-02 17-28-02\034-0901.D  
Sample Name: LQH-6-43

=====  
Acq. Operator : LQH  
Acq. Instrument : Instrument 1  
Injection Date : 1/2/2012 7:50:15 PM  
Seq. Line : 9  
Location : Vial 34  
Inj : 1  
Inj Volume : 5 µl  
Acq. Method : D:\LC\201112\LQH\LQH-6-HUN\LQH-6-HUN 2012-01-02 17-28-02\ASH-50-50-10ML-220NM-30MIN.M  
Last changed : 1/2/2012 5:39:36 PM by thl  
Analysis Method : D:\LC\201112\LQH\LQH-6-HUN\LQH-6-HUN 2012-01-02 17-28-02\034-0901.D\DA.M (ASH-50-50-10ML-220NM-30MIN.M)  
Last changed : 1/2/2012 8:23:40 PM by thl  
(modified after loading)

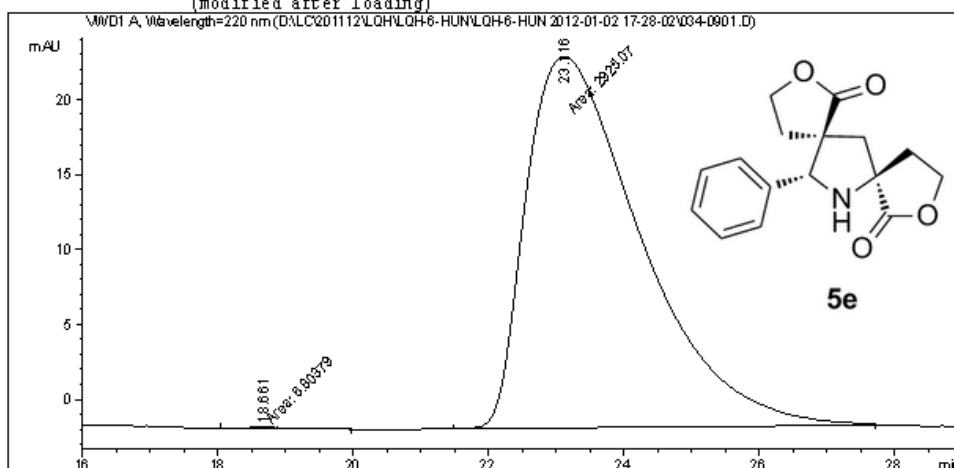

=====  
Area Percent Report  
=====

Sorted By : Signal  
Multiplier : 1.0000  
Dilution : 1.0000  
Use Multiplier & Dilution Factor with ISTDs

Signal 1: VWD1 A, Wavelength=220 nm

| Peak # | RetTime [min] | Type | Width [min] | Area mAU   | Area %  | Height [mAU] |
|--------|---------------|------|-------------|------------|---------|--------------|
| 1      | 18.661        | MM   | 1.1034      | 6.80379    | 0.2321  | 1.02772e-1   |
| 2      | 23.116        | MM   | 1.9676      | 2925.06689 | 99.7679 | 24.77680     |

Totals : 2931.87069 24.87957

=====  
\*\*\* End of Report \*\*\*  
=====

Data File D:\LC\201201\LQH\LQH-6-47\LQH-6-90B 2012-02-27 12-39-56\033-0201.D  
Sample Name: LQH-6-47C

=====  
Acq. Operator : LQH Seq. Line : 2  
Acq. Instrument : Instrument 1 Location : Vial 33  
Injection Date : 2/27/2012 12:52:36 PM Inj : 1  
Inj Volume : 5 µl  
Acq. Method : D:\LC\201201\LQH\LQH-6-47\LQH-6-90B 2012-02-27 12-39-56\ASH-50-50-10ML-  
220NM.M  
Last changed : 12/6/2011 11:03:10 AM by TMC  
Analysis Method : D:\LC\201201\LQH\LQH-6-47\LQH-6-90B 2012-02-27 12-39-56\033-0201.D\A.M (  
ASH-50-50-10ML-220NM.M)  
Last changed : 2/28/2012 1:52:21 PM by LQH  
(modified after loading)

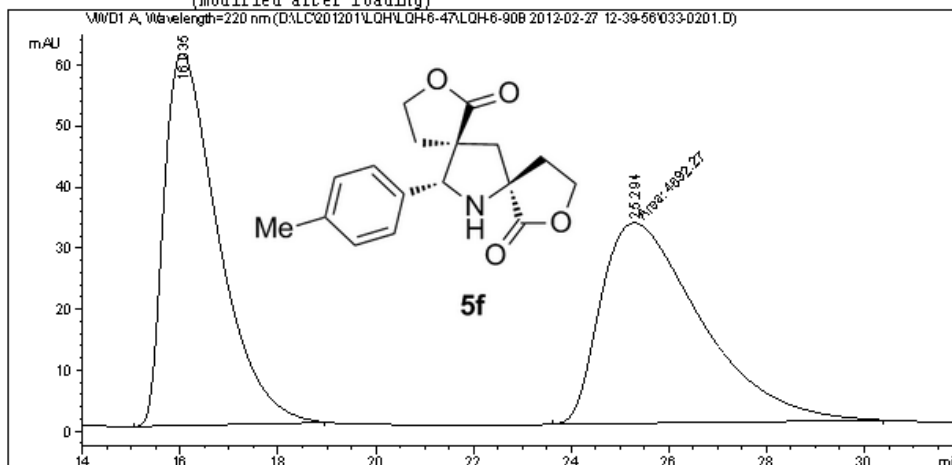

=====  
Area Percent Report  
=====

Sorted By : Signal  
Multiplier : 1.0000  
Dilution : 1.0000  
Use Multiplier & Dilution Factor with ISTDs

Signal 1: VMD1 A, Wavelength=220 nm

| Peak # | RetTime [min] | Type | Width [min] | Area mAU   | Area %  | Height [mAU] |
|--------|---------------|------|-------------|------------|---------|--------------|
| 1      | 16.035        | BB   | 1.1492      | 4697.03076 | 50.0254 | 60.97140     |
| 2      | 25.294        | MM   | 2.3817      | 4692.26660 | 49.9746 | 32.83550     |

Totals : 9389.29736 93.80690

=====  
\*\*\* End of Report \*\*\*

Instrument 1 2/28/2012 1:52:26 PM LQH

Page 1 of 1



Data File D:\LC\201201\LQH\LQH-6-48\LQH-6-90B 2012-02-27 14-37-53\035-0201.D  
 Sample Name: LQH-6-48C

```

=====
Acq. Operator   : LQH                      Seq. Line :    2
Acq. Instrument : Instrument 1              Location  : Vial 35
Injection Date  : 2/27/2012 4:03:25 PM     Inj       :    1
                                           Inj Volume: 5 µl
Acq. Method     : D:\LC\201201\LQH\LQH-6-48\LQH-6-90B 2012-02-27 14-37-53\ASH-50-50-10ML-
                220NM-40MIN.M
Last changed    : 12/2/2011 2:34:27 PM by HZL
Analysis Method : D:\LC\201201\LQH\LQH-6-48\LQH-6-90B 2012-02-27 14-37-53\035-0201.D\A.M (
                ASH-50-50-10ML-220NM-40MIN.M)
Last changed    : 3/9/2012 11:34:56 AM by FX
                (modified after loading)
Method Info     : ASH-50-50-1ML-254NM-50MIN
    
```

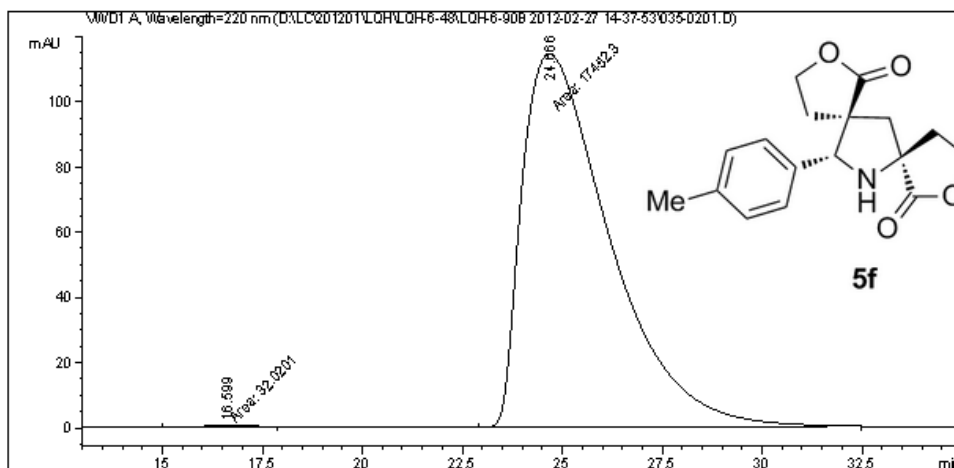

Area Percent Report

```

=====
Sorted By      :      Signal
Multiplier     :      1.0000
Dilution       :      1.0000
Use Multiplier & Dilution Factor with ISTDs
    
```

Signal 1: WVD1 A, Wavelength=220 nm

| Peak # | RetTime [min] | Type | Width [min] | Area mAU  | Area %  | Height [mAU] |
|--------|---------------|------|-------------|-----------|---------|--------------|
| 1      | 16.599        | MM   | 1.3422      | 32.02005  | 0.1831  | 3.97597e-1   |
| 2      | 24.666        | MM   | 2.5451      | 1.74523e4 | 99.8169 | 114.28714    |

Totals :                      1.74843e4    114.68474

\*\*\* End of Report \*\*\*

Instrument 1 3/9/2012 11:35:02 AM FX

Page 1 of 1

Data File D:\LC\201201\LQH\LQH-6-93\LQH-6-93C 2012-02-28 09-19-17\002-0201.D  
Sample Name: LQH-6-93A

```
=====
Acq. Operator   : LQH                      Seq. Line :    2
Acq. Instrument : Instrument 1              Location  : Vial 2
Injection Date  : 2/28/2012 10:00:47 AM    Inj       :    1
                                           Inj Volume: 5 µl
Acq. Method     : D:\LC\201201\LQH\LQH-6-93\LQH-6-93C 2012-02-28 09-19-17\ASH-50-50-10ML-
220MM.M
Last changed    : 2/28/2012 10:27:02 AM by LQH
                 (modified after loading)
Analysis Method : D:\LC\201201\LQH\LQH-6-93\LQH-6-93C 2012-02-28 09-19-17\002-0201.D\DA.M (
ASH-50-50-10ML-220MM.M)
Last changed    : 3/9/2012 11:24:19 AM by FX
                 (modified after loading)
=====
```

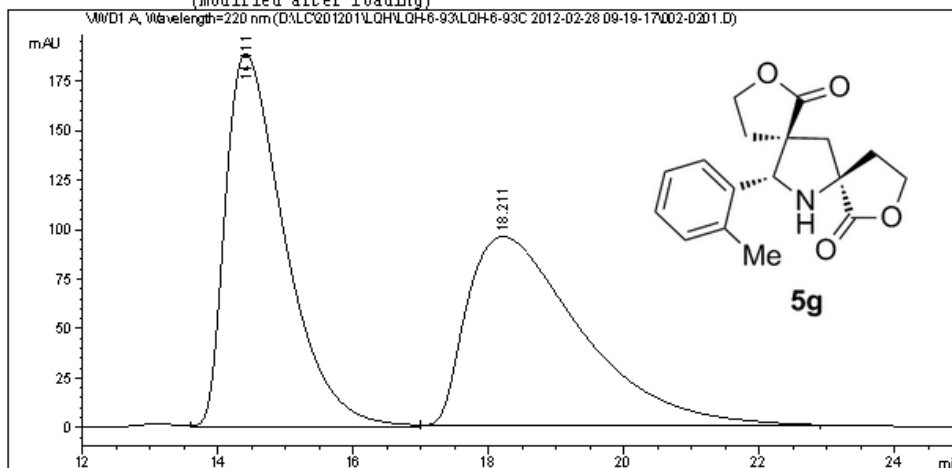

=====  
Area Percent Report  
=====

Sorted By : Signal  
Multiplier : 1.0000  
Dilution : 1.0000  
Use Multiplier & Dilution Factor with ISTDs

Signal 1: VWD1 A, Wavelength=220 nm

| Peak # | RetTime [min] | Type | Width [min] | Area mAU  | Height [mAU] | Area %  |
|--------|---------------|------|-------------|-----------|--------------|---------|
| 1      | 14.411        | VB   | 0.9306      | 1.14309e4 | 188.41473    | 50.4420 |
| 2      | 18.211        | BB   | 1.7569      | 1.12306e4 | 95.76410     | 49.5580 |

Totals : 2.26614e4 284.17883

=====  
\*\*\* End of Report \*\*\*

Instrument 1 3/9/2012 11:24:25 AM FX

Page 1 of 1

Data File D:\LC\201201\FX\FX-5-76\FX-5-76 2012-03-10 18-05-03\041-0501.D  
 Sample Name: LQH-6-94A

```

=====
Acq. Operator   : FX                               Seq. Line :    5
Acq. Instrument : Instrument 1                     Location  : Vial 41
Injection Date  : 3/10/2012 8:22:21 PM           Inj       :    1
                                                    Inj Volume:    5 µl

Acq. Method     : D:\LC\201201\FX\FX-5-76\FX-5-76 2012-03-10 18-05-03\ASH-50-50-10ML-220NM-
30MIN.M
Last changed    : 1/2/2012 5:39:36 PM by thl
Analysis Method : D:\LC\201201\FX\FX-5-76\FX-5-76 2012-03-10 18-05-03\041-0501.D\DA.M (ASH-
50-50-10ML-220NM-30MIN.M)
Last changed    : 3/12/2012 9:34:50 AM by FX
                  (modified after loading)
    
```

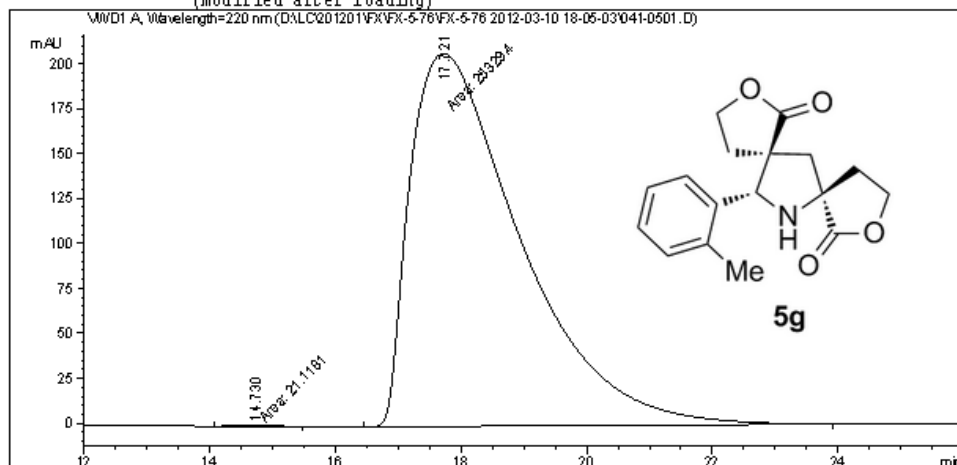

=====  
 Area Percent Report  
 =====

```

Sorted By       :      Signal
Multiplier      :      1.0000
Dilution        :      1.0000
Use Multiplier & Dilution Factor with ISTDs
    
```

Signal 1: VMD1 A, Wavelength=220 nm

| Peak # | RetTime [min] | Type | Width [min] | Area mAU  | Area *s    | Height [mAU] | Area % |
|--------|---------------|------|-------------|-----------|------------|--------------|--------|
| 1      | 14.730        | MM   | 0.7914      | 21.11814  | 4.44722e-1 | 0.0833       |        |
| 2      | 17.721        | MM   | 2.0359      | 2.53294e4 | 207.35204  | 99.9167      |        |

Totals :                      2.53505e4    207.79676

=====  
 \*\*\* End of Report \*\*\*



Data File D:\LC\201201\FX\FX-5-76\FX-5-76 2012-03-10 18-05-03\044-0801.D  
 Sample Name: LQH-6-111

```

=====
Acq. Operator   : FX                      Seq. Line :    8
Acq. Instrument : Instrument 1            Location  : Vial 44
Injection Date  : 3/10/2012 10:16:50 PM Inj       :    1
                                           Inj Volume: 5 µl

Acq. Method     : D:\LC\201201\FX\FX-5-76\FX-5-76 2012-03-10 18-05-03\ASH-50-50-10ML-220NM-
30MIN.M
Last changed    : 1/2/2012 5:39:36 PM by thl
Analysis Method : D:\LC\201201\FX\FX-5-76\FX-5-76 2012-03-10 18-05-03\044-0801.D\DA.M (ASH-
50-50-10ML-220NM-30MIN.M)
Last changed    : 3/12/2012 9:44:56 AM by FX
                  (modified after loading)
    
```

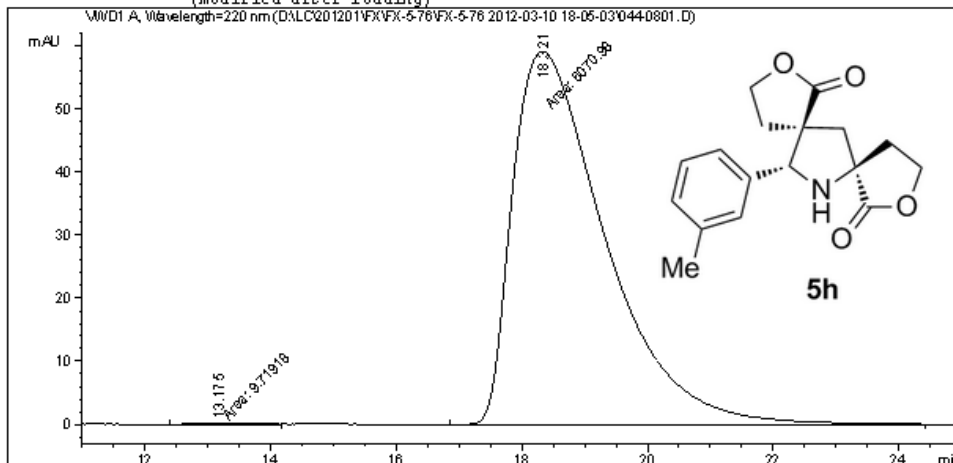

```

=====
Area Percent Report
=====
    
```

```

Sorted By      :      Signal
Multiplier     :      1.0000
Dilution       :      1.0000
Use Multiplier & Dilution Factor with ISTDs
    
```

Signal 1: VMD1 A, Wavelength=220 nm

| Peak # | RetTime [min] | Type | Width [min] | Area mAU   | Area %  | Height [mAU] |
|--------|---------------|------|-------------|------------|---------|--------------|
| 1      | 13.175        | MM   | 0.8521      | 9.71918    | 0.1598  | 1.90107e-1   |
| 2      | 18.321        | MM   | 1.7092      | 6070.97803 | 99.8402 | 59.20070     |

```
Totals :          6080.69720  59.39081
```

```

=====
*** End of Report ***
    
```

Data File D:\LC\201201\LQH\LQH-6-90\LQH-6-90B 2012-02-27 08-47-40\032-0401.D  
Sample Name: LQH-6-47B

```
=====
Acq. Operator   : LQH                               Seq. Line :    4
Acq. Instrument : Instrument 1                       Location  : Vial 32
Injection Date  : 2/27/2012 10:22:16 AM            Inj       :    1
                                                    Inj Volume: 5 µl
Acq. Method     : D:\LC\201201\LQH\LQH-6-90\LQH-6-90B 2012-02-27 08-47-40\ASH-50-50-10ML-
220MM.M
Last changed    : 2/27/2012 10:21:08 AM by LQH
(modified after loading)
Analysis Method : D:\LC\201201\LQH\LQH-6-90\LQH-6-90B 2012-02-27 08-47-40\032-0401.D\DA.M (
ASH-50-50-10ML-220MM.M)
Last changed    : 3/9/2012 11:08:16 AM by FX
(modified after loading)
=====
```

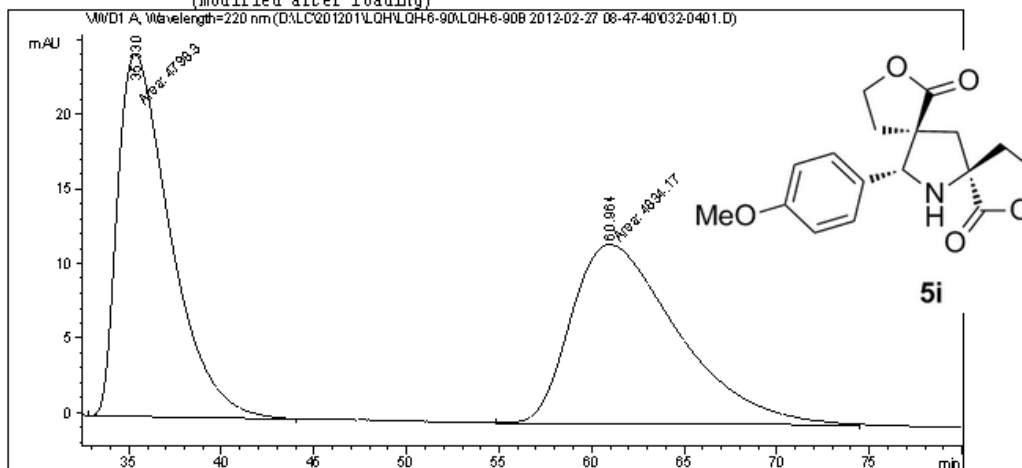

=====  
Area Percent Report  
=====

```
Sorted By      : Signal
Multiplier     : 1.0000
Dilution       : 1.0000
Use Multiplier & Dilution Factor with ISTDs
```

Signal 1: VWD1 A, Wavelength=220 nm

| Peak # | RetTime [min] | Type | Width [min] | Area mAU   | Height [mAU] | Area %  |
|--------|---------------|------|-------------|------------|--------------|---------|
| 1      | 35.330        | MM   | 3.2880      | 4798.29834 | 24.32262     | 49.8138 |
| 2      | 60.964        | MM   | 6.7069      | 4834.17285 | 12.01297     | 50.1862 |

Totals : 9632.47119 36.33559

=====  
\*\*\* End of Report \*\*\*

Instrument 1 3/9/2012 11:08:22 AM FX

Page 1 of 1

Data File D:\LC\201201\LQH\LQH-6-48\LQH-6-90B 2012-02-27 14-37-53\034-0101.D  
Sample Name: LQH-6-48B

```
=====
Acq. Operator   : LQH                      Seq. Line :    1
Acq. Instrument : Instrument 1              Location  : Vial 34
Injection Date  : 2/27/2012 2:39:24 PM     Inj       :    1
                                           Inj Volume: 5 µl
Acq. Method     : D:\LC\201201\LQH\LQH-6-48\LQH-6-90B 2012-02-27 14-37-53\ASH-50-50-10ML-
220MM.M
Last changed    : 2/27/2012 4:01:25 PM by LQH
                 (modified after loading)
Analysis Method : D:\LC\201201\LQH\LQH-6-48\LQH-6-90B 2012-02-27 14-37-53\034-0101.D\DA.M (
ASH-50-50-10ML-220MM.M)
Last changed    : 3/9/2012 11:32:06 AM by FX
                 (modified after loading)
=====
```

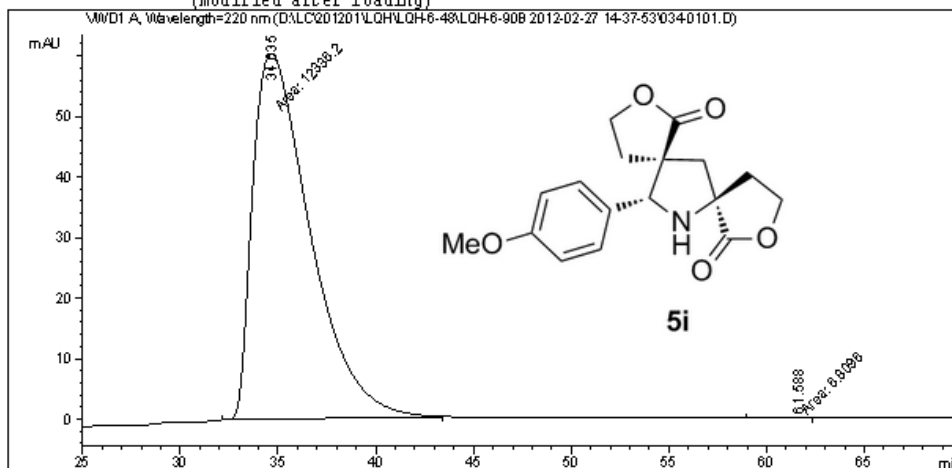

=====  
Area Percent Report  
=====

Sorted By : Signal  
Multiplier : 1.0000  
Dilution : 1.0000  
Use Multiplier & Dilution Factor with ISTDs

Signal 1: VWD1 A, Wavelength=220 nm

| Peak # | RetTime [min] | Type | Width [min] | Area mAU  | Height [mAU] | Area %  |
|--------|---------------|------|-------------|-----------|--------------|---------|
| 1      | 34.635        | MM   | 3.4068      | 1.23362e4 | 60.35048     | 99.9448 |
| 2      | 61.588        | MM   | 1.9781      | 6.80960   | 5.73759e-2   | 0.0552  |

Totals : 1.23430e4 60.40785

=====  
\*\*\* End of Report \*\*\*

Instrument 1 3/9/2012 11:33:04 AM FX

Page 1 of 1

Data File D:\LC\201201\LQH\LQH-6-93\LQH-6-93C-ODH 2012-02-28 12-29-11\001-0201.D  
 Sample Name: LQH-6-93C

```

=====
Acq. Operator   : LQH                      Seq. Line :    2
Acq. Instrument : Instrument 1              Location  : Vial 1
Injection Date  : 2/28/2012 12:41:32 PM    Inj       :    1
                                           Inj Volume: 5 µl
Acq. Method     : D:\LC\201201\LQH\LQH-6-93\LQH-6-93C-ODH 2012-02-28 12-29-11\ODH-40-60-1ML-
220NM.M
Last changed    : 2/28/2012 1:18:03 PM by LQH
                 (modified after loading)
Analysis Method : D:\LC\201201\LQH\LQH-6-93\LQH-6-93C-ODH 2012-02-28 12-29-11\001-0201.D\DA.
M (ODH-40-60-1ML-220NM.M)
Last changed    : 3/14/2012 9:22:47 PM by FX
                 (modified after loading)
Method Info     : ASH-50-50-1ML-254NM-50MIN
    
```

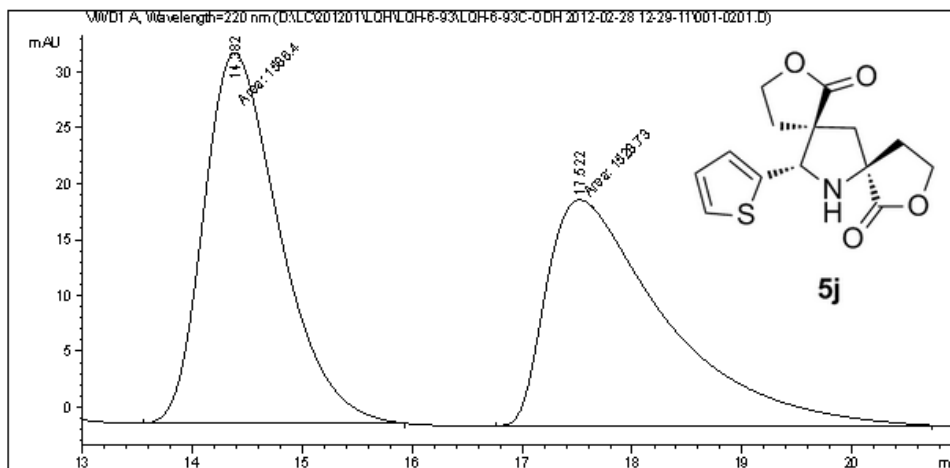

Area Percent Report

```

Sorted By      : Signal
Multiplier     : 1.0000
Dilution       : 1.0000
Use Multiplier & Dilution Factor with ISTDs
    
```

Signal 1: VMD1 A, Wavelength=220 nm

| Peak # | RetTime [min] | Type | Width [min] | Area mAU   | Area %  | Height [mAU] | Area %  |
|--------|---------------|------|-------------|------------|---------|--------------|---------|
| 1      | 14.382        | MM   | 0.7990      | 1586.40454 | 50.9256 | 33.09176     | 50.9256 |
| 2      | 17.522        | MM   | 1.2582      | 1528.73437 | 49.0744 | 20.25014     | 49.0744 |

Totals : 3115.13892 53.34190

Instrument 1 3/14/2012 9:22:53 PM FX

Page 1 of 1



Data File D:\LC\DATA\LQH\LQH-6-94\LQH-6-94C 2012-03-16 09-35-50\063-0101.D  
Sample Name: LQH-6-94C

```
=====
Acq. Operator   : LQH                      Seq. Line :    1
Acq. Instrument : Instrument 1              Location  : Vial 63
Injection Date  : 3/16/2012 9:37:19 AM     Inj       :    1
                                           Inj Volume: 5 µl
Acq. Method     : D:\LC\201201\LQH\LQH-6-94\LQH-6-94C 2012-03-16 09-35-50\ODH-40-60-IML-
220MM.M
Last changed    : 3/16/2012 9:58:38 AM by LQH
                 (modified after loading)
Analysis Method : D:\LC\DATA\LQH\LQH-6-94\LQH-6-94C 2012-03-16 09-35-50\063-0101.D\DA.M
                 (ODH-40-60-IML-220MM.M)
Last changed    : 5/5/2012 7:04:42 PM by lqh
                 (modified after loading)
Method Info     : ASH-50-50-IML-254NM-50MIN
=====
```

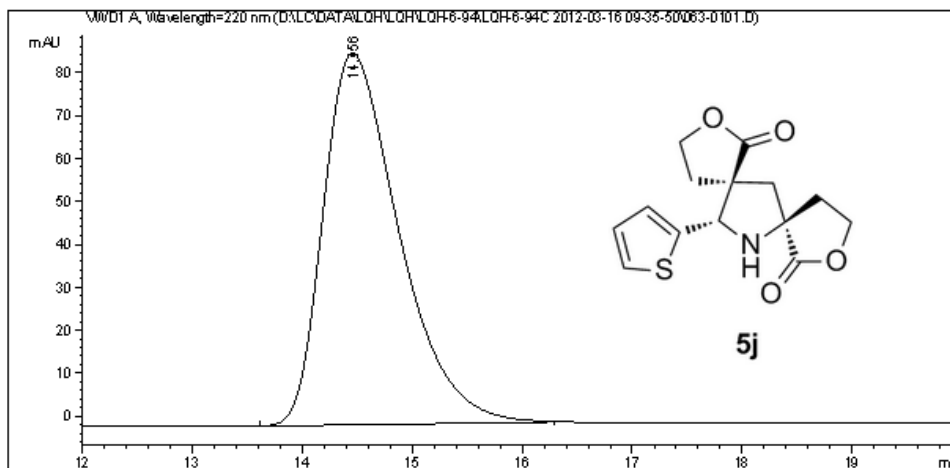

=====  
Area Percent Report  
=====

Sorted By : Signal  
Multiplier : 1.0000  
Dilution : 1.0000  
Use Multiplier & Dilution Factor with ISTDs

Signal 1: VWD1 A, Wavelength=220 nm

| Peak # | RetTime [min] | Type | Width [min] | Area mAU   | Height [mAU] | Area %   |
|--------|---------------|------|-------------|------------|--------------|----------|
| 1      | 14.456        | BB   | 0.7357      | 4144.70801 | 86.42880     | 100.0000 |

Totals : 4144.70801 86.42880

=====  
\*\*\* End of Report \*\*\*

Instrument 1 5/5/2012 7:04:49 PM lqh

Page 1 of 1

Data File D:\LC\201201\LQH\LQH-6-93\LQH-6-93C-ODH 2012-02-28 12-29-11\003-0301.D  
Sample Name: LQH-6-93D

```
=====
Acq. Operator   : LQH                               Seq. Line :    3
Acq. Instrument : Instrument 1                       Location  : Vial 3
Injection Date  : 2/28/2012 1:19:47 PM             Inj       :    1
                                                    Inj Volume: 5 µl
Acq. Method     : D:\LC\201201\LQH\LQH-6-93\LQH-6-93C-ODH 2012-02-28 12-29-11\ASH-50-50-
10ML-220NM.M
Last changed    : 2/28/2012 1:53:43 PM by LQH
(modified after loading)
Analysis Method : D:\LC\201201\LQH\LQH-6-93\LQH-6-93C-ODH 2012-02-28 12-29-11\003-0301.D\DA.
M (ASH-50-50-10ML-220NM.M)
Last changed    : 3/9/2012 11:28:14 AM by FX
(modified after loading)
=====
```

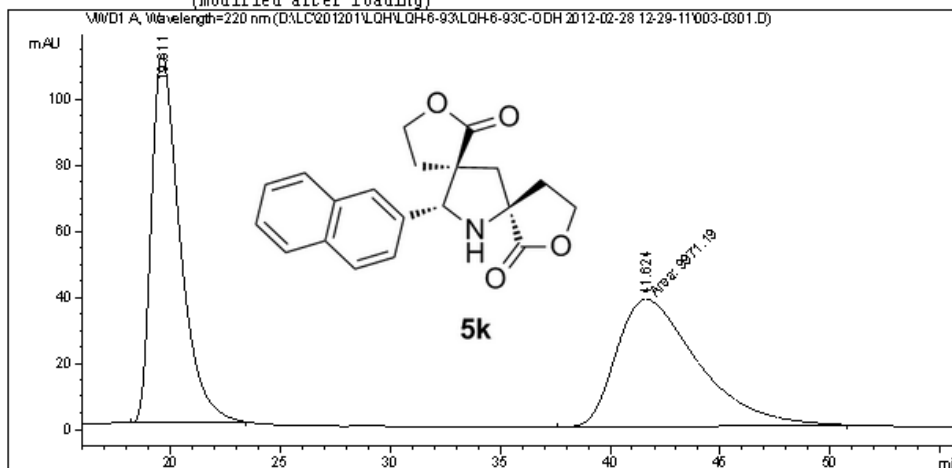

=====  
Area Percent Report  
=====

Sorted By : Signal  
Multiplier : 1.0000  
Dilution : 1.0000  
Use Multiplier & Dilution Factor with ISTDs

Signal 1: VWD1 A, Wavelength=220 nm

| Peak # | RetTime [min] | Type | Width [min] | Area mAU   | Height [mAU] | Area %  |
|--------|---------------|------|-------------|------------|--------------|---------|
| 1      | 19.611        | BB   | 1.3423      | 1.01271e4  | 111.79090    | 50.3879 |
| 2      | 41.624        | MM   | 4.3220      | 9971.19336 | 38.45141     | 49.6121 |

Totals : 2.00983e4 150.24231

=====  
\*\*\* End of Report \*\*\*

Instrument 1 3/9/2012 11:28:19 AM FX

Page 1 of 1

Data File D:\LC\DATA\LQH\LQH-6-94\LQH-6-94D 2012-03-12 10-51-32\057-0101.D  
Sample Name: LQH-6-94D

```
=====
Acq. Operator   : lqh                               Seq. Line :    1
Acq. Instrument : Instrument 1                       Location  : Vial 57
Injection Date  : 3/12/2012 10:53:09 AM             Inj       :    1
                                                    Inj Volume: 5 µl

Acq. Method    : D:\LC\201201\LQH\LQH-6-94\LQH-6-94D 2012-03-12 10-51-32\ASH-50-50-10ML-
                220NM-60MIN.M
Last changed   : 12/6/2011 9:55:58 PM by TMC
Analysis Method : D:\LC\DATA\LQH\LQH-6-94\LQH-6-94D 2012-03-12 10-51-32\057-0101.D\DA.M
                (ASH-50-50-10ML-220NM-60MIN.M)
Last changed   : 5/5/2012 7:09:28 PM by lqh
                (modified after loading)
=====
```

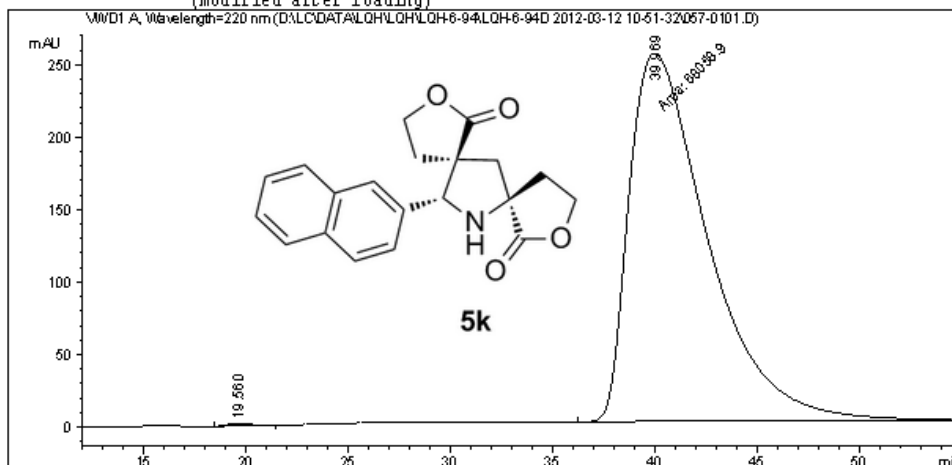

```
=====
                          Area Percent Report
=====
```

```
Sorted By      :      Signal
Multiplier     :      1.0000
Dilution       :      1.0000
Use Multiplier & Dilution Factor with ISTDs
```

Signal 1: VWD1 A, Wavelength=220 nm

| Peak # | RetTime [min] | Type | Width [min] | Area mAU  | Area %  | Height [mAU] | Area %  |
|--------|---------------|------|-------------|-----------|---------|--------------|---------|
| 1      | 19.560        | BB   | 0.8952      | 142.06021 | 0.2083  | 1.86954      | 0.2083  |
| 2      | 39.969        | MM   | 4.4642      | 6.80589e4 | 99.7917 | 254.09404    | 99.7917 |

```
Totals :                      6.82010e4  255.96358
```

```
=====
*** End of Report ***
```

Instrument 1 5/5/2012 7:09:33 PM lqh

Page 1 of 1

Data File D:\LC\DATA\LQH\LQH-9-45\LQH-9-45 2006-01-10 11-36-28\094-0501.D  
Sample Name: LQH-9-45

```
=====
Acq. Operator   : THL                               Seq. Line :    5
Acq. Instrument : Instrument 1                       Location  : Vial 94
Injection Date  : 1/10/2006 1:20:15 PM              Inj       :    1
                                                    Inj Volume: 5 µl
Acq. Method     : D:\LC\DATA\LQH\LQH-9-45\LQH-9-45 2006-01-10 11-36-28\ASH-50-50-10ML-220NM-
40MIN.M
Last changed    : 12/2/2011 2:34:27 PM by HZL
Analysis Method : D:\LC\DATA\LQH\LQH-9-45\LQH-9-45 2006-01-10 11-36-28\094-0501.D\DA.M (ASH-
50-50-10ML-220NM-40MIN.M)
Last changed    : 3/16/2013 4:25:49 PM by FX
                : (modified after loading)
Method Info     : ASH-50-50-1ML-254NM-50MIN
=====
```

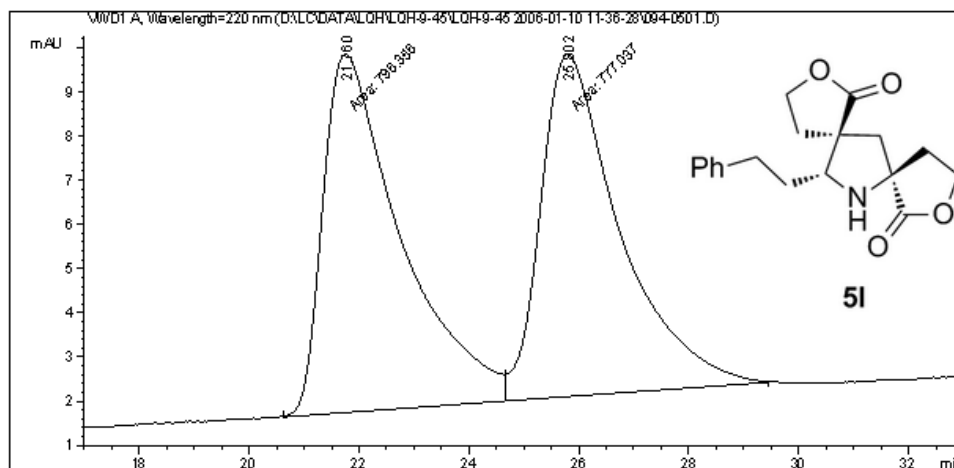

=====  
Area Percent Report  
=====

Sorted By : Signal  
Multiplier : 1.0000  
Dilution : 1.0000  
Use Multiplier & Dilution Factor with ISTDs

Signal 1: VMD1 A, Wavelength=220 nm

| Peak # | RetTime [min] | Type | Width [min] | Area mAU  | Area *s | Height [mAU] | Area % |
|--------|---------------|------|-------------|-----------|---------|--------------|--------|
| 1      | 21.760        | MF   | 1.6355      | 796.35645 | 8.11544 | 50.6139      |        |
| 2      | 25.802        | FM   | 1.6738      | 777.03687 | 7.73732 | 49.3861      |        |

Totals : 1573.39331 15.85276

=====  
\*\*\* End of Report \*\*\*

Instrument 1 3/16/2013 4:26:26 PM FX

Page 1 of 1

Data File D:\LC\DATA\LQH\LQH-9-45\LQH-9-45 2006-01-10 11-36-28\095-0601.D  
Sample Name: LQH-9-46

```
=====
Acq. Operator   : THL                               Seq. Line :    6
Acq. Instrument : Instrument 1                       Location  : Vial 95
Injection Date  : 1/10/2006 2:01:31 PM              Inj       :    1
                                                    Inj Volume: 5 µl

Acq. Method     : D:\LC\DATA\LQH\LQH-9-45\LQH-9-45 2006-01-10 11-36-28\ASH-50-50-10ML-220NM-
40MIN.M
Last changed    : 12/2/2011 2:34:27 PM by HZL
Analysis Method : D:\LC\DATA\LQH\LQH-9-45\LQH-9-45 2006-01-10 11-36-28\095-0601.D\DA.M (ASH-
50-50-10ML-220NM-40MIN.M)
Last changed    : 3/16/2013 4:28:36 PM by FX
                : (modified after loading)
Method Info     : ASH-50-50-1ML-254NM-50MIN
=====
```

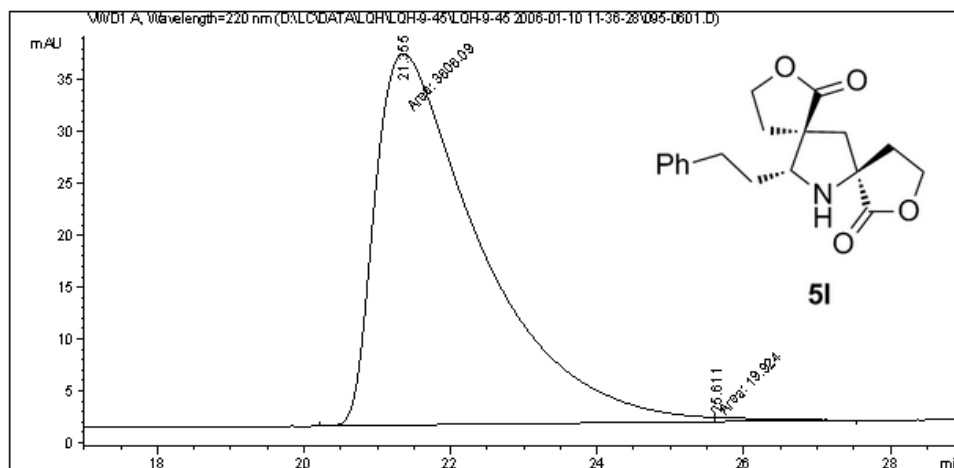

=====  
Area Percent Report  
=====

Sorted By : Signal  
Multiplier : 1.0000  
Dilution : 1.0000  
Use Multiplier & Dilution Factor with ISTDs

Signal 1: VMD1 A, Wavelength=220 nm

| Peak # | RetTime [min] | Type | Width [min] | Area mAU *s | Height [mAU] | Area %  |
|--------|---------------|------|-------------|-------------|--------------|---------|
| 1      | 21.365        | MF   | 1.6786      | 3606.08813  | 35.80420     | 99.4505 |
| 2      | 25.611        | FM   | 0.7911      | 19.92399    | 4.19765e-1   | 0.5495  |

Totals : 3626.01212 36.22396

=====  
\*\*\* End of Report \*\*\*

Instrument 1 3/16/2013 4:29:06 PM FX

Page 1 of 1

Data File D:\LC\DATA\LQH\LQH-9-40\LQH-9-40 2006-01-06 20-16-38\092-0301.D  
Sample Name: LQH-9-40

```
=====
Acq. Operator   : LQH                               Seq. Line :   3
Acq. Instrument : Instrument 1                       Location  : Vial 92
Injection Date  : 1/6/2006 8:58:01 PM              Inj       :   1
                                                    Inj Volume: 5 µl
Acq. Method     : D:\LC\DATA\LQH\LQH-9-40\LQH-9-40 2006-01-06 20-16-38\ASH-50-50-10ML-220MM.M
Last changed    : 1/6/2006 8:56:37 PM by LQH
                  (modified after loading)
Analysis Method : D:\LC\DATA\LQH\LQH-9-40\LQH-9-40 2006-01-06 20-16-38\092-0301.D\DA.M (ASH-
                  50-50-10ML-220MM.M)
Last changed    : 3/16/2013 4:19:15 PM by FX
                  (modified after loading)
=====
```

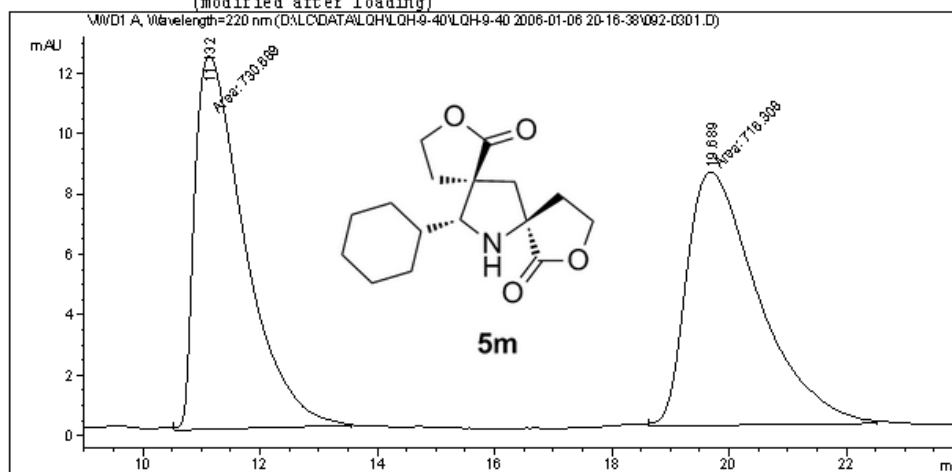

Area Percent Report

```
=====
Sorted By       : Signal
Multiplier      : 1.0000
Dilution        : 1.0000
Use Multiplier & Dilution Factor with ISTDs
=====
```

Signal 1: VWD1 A, Wavelength=220 nm

| Peak # | RetTime [min] | Type | Width [min] | Area [mAU *s] | Height [mAU] | Area %  |
|--------|---------------|------|-------------|---------------|--------------|---------|
| 1      | 11.132        | MM   | 0.9845      | 730.68909     | 12.37048     | 50.4969 |
| 2      | 19.689        | MM   | 1.4211      | 716.30835     | 8.40070      | 49.5031 |

```
Totals :                1446.99744  20.77118
```

\*\*\* End of Report \*\*\*

Data File D:\LC\DATA\LQH\LQH-9-45\LQH-9-45 2006-01-10 11-36-28\093-0401.D  
 Sample Name: LQH-9-40

```
=====
Acq. Operator   : THL                               Seq. Line :    4
Acq. Instrument : Instrument 1                       Location  : Vial 93
Injection Date  : 1/10/2006 12:53:34 PM             Inj       :    1
                                                    Inj Volume: 5 µl

Acq. Method    : D:\LC\DATA\LQH\LQH-9-45\LQH-9-45 2006-01-10 11-36-28\ASH-50-50-1ML-220NM.M
Last changed   : 1/10/2006 12:52:17 PM by THL
                (modified after loading)
Analysis Method : D:\LC\DATA\LQH\LQH-9-45\LQH-9-45 2006-01-10 11-36-28\093-0401.D\DA.M (ASH-
50-50-1ML-220NM.M)
Last changed   : 3/16/2013 4:24:15 PM by FX
                (modified after loading)
=====
```

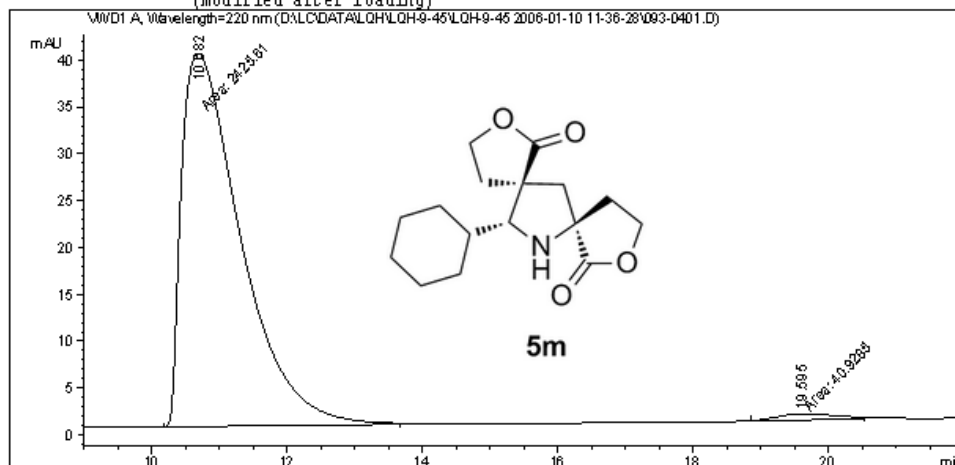

=====  
 Area Percent Report  
 =====

```
Sorted By      :      Signal
Multiplier     :      1.0000
Dilution       :      1.0000
Use Multiplier & Dilution Factor with ISTDs
```

Signal 1: VWD1 A, Wavelength=220 nm

| Peak # | RetTime [min] | Type | Width [min] | Area mAU   | Area %  | Height [mAU] |
|--------|---------------|------|-------------|------------|---------|--------------|
| 1      | 10.682        | MF   | 1.0141      | 2425.61426 | 98.3407 | 39.86407     |
| 2      | 19.595        | MM   | 1.0105      | 40.92847   | 1.6593  | 6.75068e-1   |

Totals :                         2466.54273    40.53914

=====  
 \*\*\* End of Report \*\*\*
